# Supplementary material for: One-Step Synthesis of Chiral Oxindole-type Analogues with Potent Anti-inflammatory and Analgesic Activities
Source: PubMed Central journal article supplement (PMC4555174; doi:10.1038/srep13699), 2015-09-01

## Supplementary Information

### **One-Step Synthesis of Chiral Oxindole-type Analogues with Potent Anti-inflammatory and Analgesic Activities**

Yulong Sun<sup>1,3†</sup>, Jia Liu<sup>2†</sup>, Xianxing Jiang<sup>1†\*</sup>, Tao Sun<sup>3</sup>, Luping Liu<sup>3</sup>, Xiaoyuan Zhang<sup>3</sup>, Shaoli Ding<sup>4</sup>,  
Jingyi Li<sup>3</sup>, Yan Zhuang<sup>3</sup>, Yiqing Wang<sup>5</sup> & Rui Wang<sup>1,3\*</sup>

<sup>1</sup> School of Pharmaceutical Sciences, Sun Yat-Sen University, Guangzhou, China, 510006.

<sup>2</sup> Shanghai Institute for Advanced Immunochemical Studies, ShanghaiTech University, Shanghai, China, 200031.

<sup>3</sup> Key Laboratory of Preclinical Study for New Drugs of Gansu Province, School of Basic Medical Sciences, Lanzhou University, China, 730000.

<sup>4</sup> Anesthesia department of Gansu Provincial Hospital, China, 730000.

<sup>5</sup> Key Laboratory for Reproductive Medicine and Embryo, The Reproductive Medicine Research Center of the First Hospital of Lanzhou University, Gansu, China, 730000

<sup>†</sup>Co-first author (these authors contributed equally to this work)

## **Table of contents**

- 1. Supplementary Materials and Methods (S3-S5)**
- 2. Figures (S6-S12)**
- 3. Supplementary References (S13-S14)**
- 4. Characterization of Synthesized Compounds (S15-S82)**

## Supplementary Materials and Methods

### *1. General methods for synthesis of spirooxindole compounds.*

All solvents were dried according to established procedures. Reactions were monitored by thin layer chromatography (TLC) and column chromatography purifications were carried out using silica gel GF254. Proton and carbon nuclear magnetic resonance ( $^1\text{H}$  NMR and  $^{13}\text{C}$  NMR) spectra were recorded on Bruker 300 MHz spectrometer in  $\text{CDCl}_3$  or  $[\text{D}^6]\text{DMSO}$  using tetramethylsilane (TMS) as internal standard unless otherwise noted. Data are presented as follows: chemical shift, integration, multiplicity (br = broad, s = singlet, d = doublet, t = triplet, q = quartet, m = multiplet) and coupling constant in Hertz (Hz). Infrared (IR) spectra were recorded on a FT-IR spectrometer. Optical rotations were recorded on a Perkin-Elmer 341 polarimeter. HR-MS was measured with an APEX II 47e mass spectrometer. The ee value determination was carried out using chiral high-performance liquid chromatography (HPLC) with Daicel Chiracel AD-H column on Waters with a 2998 UV-detector.

### *2. Ethics Statement*

All animal experiments were performed in accordance with the guidelines of China Council on Animal Care and Use. All animal procedures carried out in this study were reviewed, approved, and supervised by the Institutional Animal Care and Use Committee of the Ethics Committee of Lanzhou University, China.

### *3. Isolation of primary peritoneal macrophages*

This method has been used elsewhere <sup>1</sup>. Briefly, primary mouse peritoneal macrophages were obtained from C57BL/6 male mice (25-31 g) by intraperitoneal (i.p.) injection of 2 mL of sterile 3% Brewer thioglycollate broth. Four days later, cells were harvested by a lavage of the peritoneal cavity with 5 ml of RPMI 1640 medium containing 10% fetal bovine serum (FBS, Life Technologies). The primary peritoneal macrophages were seeded on to 96-well plates, kept for 2 h on plates to adhere and then washed three times with pre-warmed medium to remove the non-adherent cells. Macrophages were allowed to rest for 24 h in fresh complete medium before treatment with different drugs.

### *4. Cytotoxic activity assays*

Cytotoxicity of compounds was assessed by standard MTT assay. Mouse primary peritoneal macrophage cells ( $5 \times 10^3$ /well in 90  $\mu\text{L}$  medium) were seeded in 96-well plates and cultured for 24 h. Compounds of different concentrations ranging from 10 – 50  $\mu\text{M}$  were added to the corresponding wells, and the plates were incubated for 72 h. Then, 10  $\mu\text{L}$  of MTT (Sigma-Aldrich, St. Louis, MO, USA) solution (5.0 mg/mL) was added to each well. After 4 h of incubation at 37  $^\circ\text{C}$ , the medium was aspirated and the dye crystals were removed by DMSO wash. The absorbance at 490 nm of each sample was then determined by ELISA plate reader (Model 680, BioRad, Hercules, CA, USA).

### **5. Nitrite assay for estimation of NO production**

The nitrite assay used were described previously<sup>2</sup>. Primary peritoneal macrophages ( $1 \times 10^4$ /well) were plated in 96-well plates in MEM with 10% heat-inactivated FBS, and then treated with test compounds for 72 h. The supernatant was removed and fresh media containing 1  $\mu\text{g/mL}$  lipopolysaccharide (LPS, *Escherichia coli* serotype 0111:B4, Life Technologies). The culture was incubated for 72 h and the accumulation of stable nitrite in culture supernatants was evaluated by Griess reaction<sup>3</sup>. Briefly, 100  $\mu\text{L}$  medium supernatant from each well was transferred into an empty 96-well plate and then 100  $\mu\text{L}$  Griess reagent (Sigma) was added into each well. The reaction was kept at room temperature for 15 min and the absorbance at 540 nm was determined using Tecan infinite M200 (Tecan Group, Männedorf, Switzerland). NO production was calculated according to a standard curve of sodium nitrite of known concentrations.

### **6. Acute gastric damage assay**

Wistar rats (180-200 g) were placed in the operation room 72 h before the experiments for acclimatization. At 12 h before the test, rats were placed in cages with rinsed mesh bottoms with free access to water, but no food. Animals were assigned randomly to three groups with five animals per group. Indomethacin (30 mg/kg), Q4c (50 mg/kg) or vehicle only was orally administrated to rats in a volume/weight ratio of 5 ml/kg. All compounds were freshly prepared before dosing. At 6 h post dosing, rats were sacrificed using carbon dioxide. The stomach was removed from rats, opened along the greater curvature, gently rinsed with water, placed on petri dishes, and then digitally photographed by SONY W80 Cyber-shot camera (SONY, Japan).

### **7. Evaluation of in vivo anti-inflammatory and analgesic activities of Q4c**

Prior to experiments, animals (C57BL/6 mice and Wistar rats) were housed for 1 week at stable conditions with temperature of 20-23 °C and humidity of 65-75%. Settled artificial light cycle and access to food and water *ad libitum* were provided. All animals were kept and experiments were performed in accordance with the European Community guidelines for the use of experimental animals (86/609/EEC). All the protocols in this study were executed under the guideline of the Ethics Committee of Lanzhou University, China. Animals received human care and all efforts were undertaken to minimize animal suffering before and during experiments.

*Xylene-induced ear edema model.* Topical application of xylene can cause acute inflammation which is characterized by edema and granulocytic cell infiltration into the skin. Experiments were executed as described previously<sup>4</sup>. Briefly, mice were i.p. treated with vehicle, Q4c of varying concentrations and a traditional NSAID indomethacin as a reference compound. At 30 min after drug administration, 10.0  $\mu\text{L}$  of 2.5% (v/v) xylene dissolved in acetone solution was applied to the anterior and posterior surface of the right ear. The left ear remained untreated. Control animals received only the irritant, while the test mice received both the irritant and drugs. At the time of maximum inflammatory response (~3 h after xylene treatment), mice were sacrificed by cervical dislocation and a tissue disk of 6 mm diameter was cut from each ear lobe. Edema was calculated by the difference in weight between the samples from right treated and left untreated ears. The anti-edematous activity of compounds was presented as percent inhibition of ear swelling in mice treated with the test substances with respect to that in control

mice treated with the irritant alone<sup>5, 6, 7, 8</sup>. A total of ten mice were employed for each group of treatment.

*Carrageenan-induced paw inflammation model.* Acute inflammation was induced by intraplantar (i.pl.) injection of 25.0  $\mu$ L of carrageenan (1% w/v in saline) into the right hind paw of male mice<sup>9</sup>. The experimental setup constituted five groups with seven mice per group. Group 1 received an i.p. treatment of 60.0  $\mu$ L vehicle saline solution containing 5% (v/v) DMSO and 5% (v/v) Cremophor EL. At 30 min after vehicle administration, 25.0  $\mu$ L of 1%(w/v) carrageenan (Life Technologies) in saline solution was s.c. injected in the right footpad and 25.0  $\mu$ L of saline in the left footpad. Group 2-4 were injected i.p. with 300.0 $\mu$ L of Q4c for varying doses followed by carrageenan treatment. Group 5 was treated i.p. with 300.0  $\mu$ L of DEX (5.0 mg/kg, a reference drug) followed by carrageenan injections. As for the groups to test the effects of various inhibitors, mice were administrated with Q4c (25.0 mg/kg, i.p.) in the presence or absence of different inhibitors. To examine the effects of inhibitors, mice were i.pl. administrated with 25.0 mg/kg of Q4c in the presence or absence of different inhibitors. NF- $\kappa$ B pathway inhibitor BAY 11-7082 and iNOS inhibitor S-methyl-ITU (SMT) were examined in this study. The thickness of left and right footpads was measured using a caliper at 1, 2, 3, 4, 5, 6, 24 and 48 h post dosing. The difference in the thickness of left untreated and right treated footpads was calculated. This study was executed in a blinded manner.

*Acetic acid writhing test.* The writhing test was carried out according to the method of previous study<sup>10, 11</sup>. Male mice were treated with Q4c (12.5, 25.0, 50.0 mg/kg, i.p.) or morphine (5.0 mg/kg, i.p.)for 15 min and then 0.6% freshly prepared aqueous solution of acetic acidwas i.p. administrated. The number of writhes was recorded at 15min after injection of acetic acid. The analgesic activity of compounds was presented as the percentage decrease in the number of writhes and calculatedusing the following formula: % inhibition of writhes =  $(V - D)/V \times 100$ , where V and D present the number of writhes in vehicle-treated group or drug-treated group, respectively.

*Tail-flick test.* The nociceptive response was assessed by the radiant heat tail-flick test. Male mice weighing 20.0-22.0 g were used. The animals were gently restrained by hand, and a light beam was focused onto the tail. At the beginning of the study, the lamp intensity was adjusted to elicit a response in control animals within 3-5 s. A cut-off time was set at 10 s to minimize tissue damage. Tail-flick time was determined before injection and 5, 10, 15, 20, 30, 40, 50 and 60 min after injection. Every male mouse was used only once.

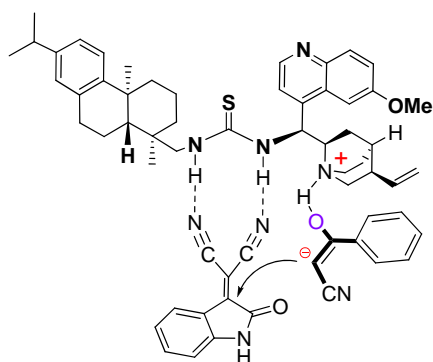

**Supplementary Figure 1.** Proposed mechanism of the asymmetric synthesis of novel spirooxindole-type pyranopyrimidines.

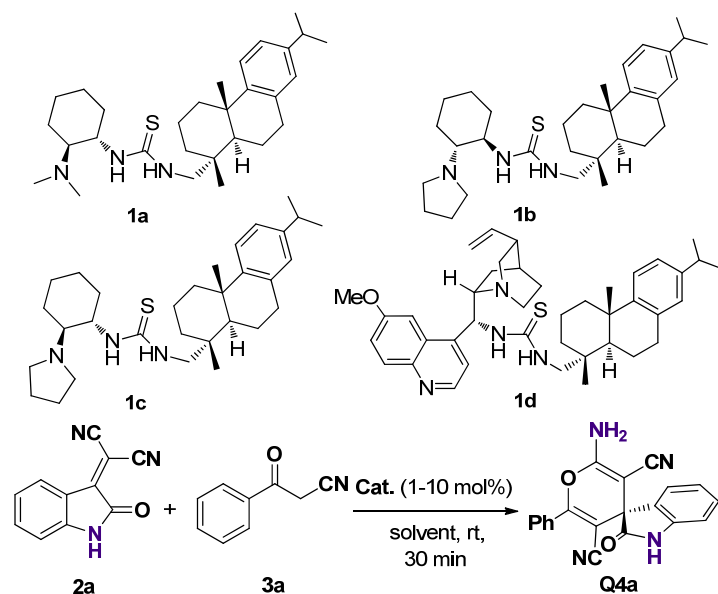

| Entry | Cat.      | Solvent                         | Yield [%] | ee [%] |
|-------|-----------|---------------------------------|-----------|--------|
| 1     | <b>1a</b> | CH <sub>2</sub> Cl <sub>2</sub> | 91        | 65     |
| 2     | <b>1b</b> | CH <sub>2</sub> Cl <sub>2</sub> | 92        | 85     |
| 3     | <b>1c</b> | CH <sub>2</sub> Cl <sub>2</sub> | 88        | -79    |
| 4     | <b>1d</b> | CH <sub>2</sub> Cl <sub>2</sub> | 90        | 98     |
| 5     | <b>1d</b> | toluene                         | 80        | 55     |
| 6     | <b>1d</b> | THF                             | 40        | 36     |
| 7     | <b>1d</b> | Et <sub>2</sub> O               | 94        | 99     |
| 8     | <b>1d</b> | MeOH                            | 50        | 10     |

**Supplementary Figure 2.** Optimization of reaction parameters. Unless noted, the reaction was conducted with **2a** (0.22 mmol) and **3a** (0.20 mmol) using 1.0 mol% catalyst for 30 min at room temperature. Yield and ee values were determined by HPLC, and configuration was assigned by comparison of retention time and specific rotation of the obtained compounds with data reported in literature.<sup>12,13</sup>

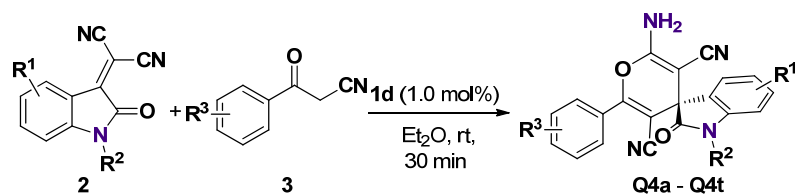

| entry | R <sup>1</sup> | R <sup>2</sup> | R <sup>3</sup> | Yield[%] <sup>[b]</sup> | ee [%] <sup>[c]</sup> |
|-------|----------------|----------------|----------------|-------------------------|-----------------------|
| 1     | H              | H              | H              | 94 (Q4a)                | 99                    |
| 2     | 5-F            | H              | H              | 78 (Q4b)                | >99                   |
| 3     | 7-F            | H              | H              | 92 (Q4c)                | 93                    |
| 4     | 5-MeO          | H              | H              | 84 (Q4d)                | 94                    |
| 5     | H              | Me             | H              | 80 (Q4e)                | 95                    |
| 6     | H              | Ally           | H              | 99 (Q4f)                | 95                    |
| 7     | H              | Ph             | H              | 87 (Q4g)                | 98                    |
| 8     | H              | Bn             | H              | 89 (Q4h)                | 96                    |
| 9     | H              | Ac             | H              | 85 (Q4i)                | >99                   |
| 10    | 7-F            | Ally           | H              | 93 (Q4j)                | 95                    |
| 11    | 5-Cl           | Ally           | H              | 80 (Q4k)                | >99                   |
| 12    | 7-Cl           | Ally           | H              | 87 (Q4l)                | 97                    |
| 13    | 5-Cl,7-Me      | Ally           | H              | 99 (Q4m)                | 99                    |
| 14    | 5-Br           | Ally           | H              | 90 (Q4n)                | >99                   |
| 15    | 5-Me           | Ally           | H              | 92 (Q4o)                | >99                   |
| 16    | 5-MeO          | Ally           | H              | 99 (Q4p)                | >99                   |
| 17    | H              | H              | 3-Cl           | 75 (Q4q)                | >99                   |
| 18    | H              | H              | 4-Cl           | 78 (Q4r)                | >99                   |
| 19    | H              | H              | 3-Me           | 88 (Q4s)                | >99                   |
| 20    | H              | H              | 4-Me           | 90 (Q4t)                | 90                    |

**Supplementary Figure 3.** Synthesis of various isatylidene malononitriles under optimized conditions. Unless noted, the reactions were conducted with **2** (0.22 mmol) and **3** (0.20 mmol) using 1.0 mol% catalyst in Et<sub>2</sub>O for 30 min at room temperature. Yield and ee values were determined by HPLC, and configuration was assigned by comparison of retention time and specific rotation of the obtained compounds with data reported in literature.<sup>12,13</sup>



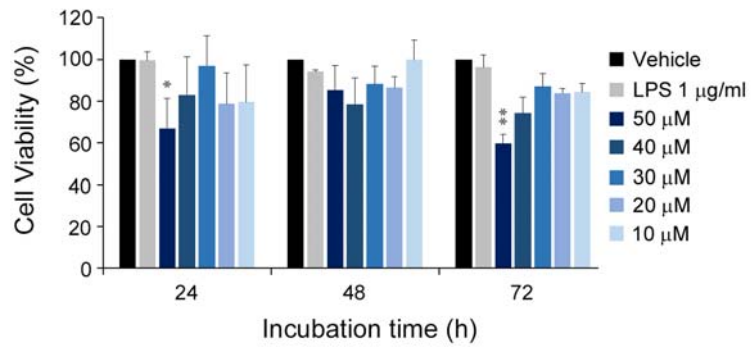

**Supplementary Figure 4.** Cytotoxicity of Q4c on mouse primary peritoneal macrophages. Q4c of various concentrations was incubated with primary peritoneal macrophages for 24, 48 and 72 h and cell viability was determined by MTT assay. Data are shown as mean  $\pm$  s.e. ( $n = 3$ ). Significant difference between vehicle and test groups was evaluated by two-way ANOVA, followed by Tukey post-tests. \*, significantly different from vehicle, \*,  $p < 0.05$ ; \*\*,  $p < 0.01$ .

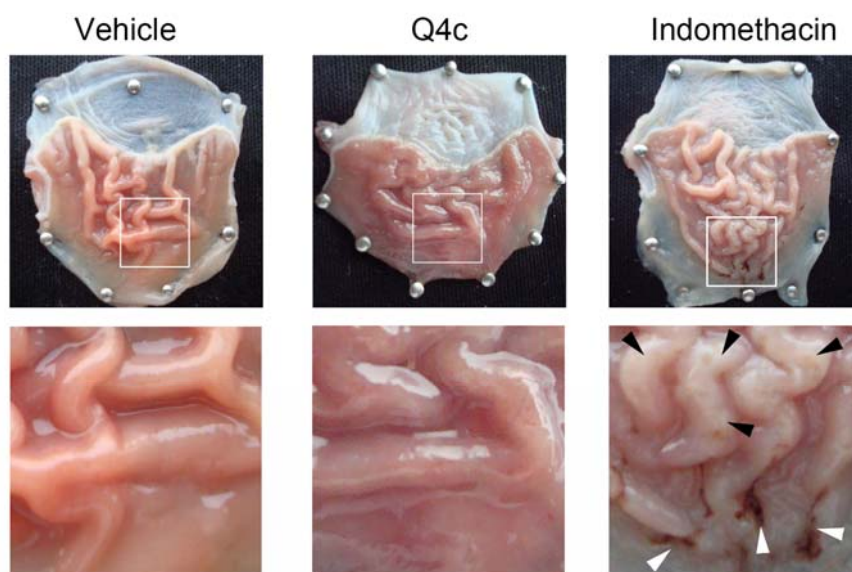

**Supplementary Figure 5.** Analysis of acute gastric damage of Q4c (30 mg/kg) and indomethacin (30 mg/kg). White and black arrows indicate hemorrhages and ulcers, respectively.

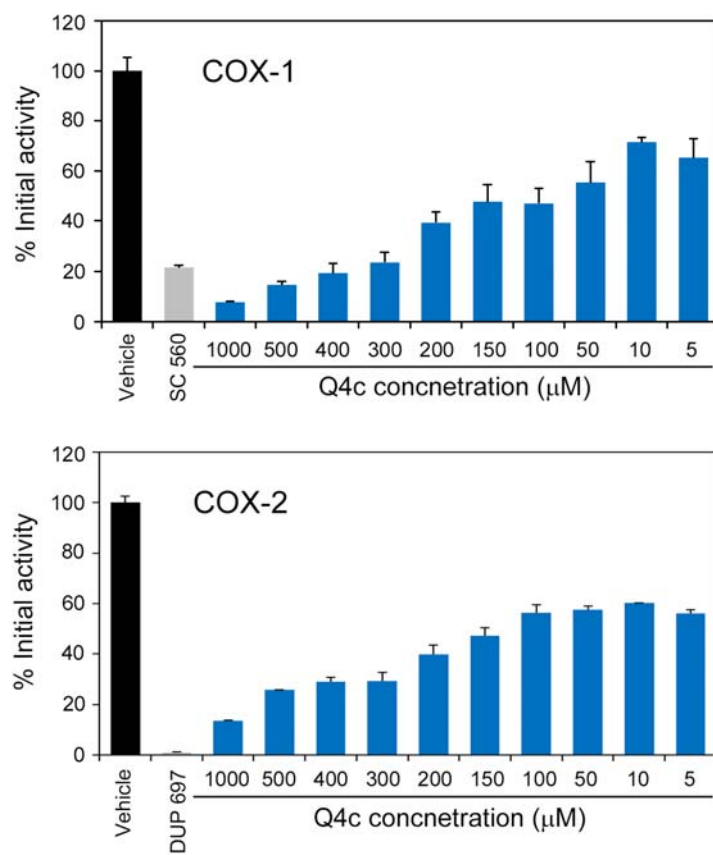

**Supplementary Figure 6.** *In vitro* inhibitory activity of Q4c to COX-1 and COX-2. The inhibition assay was performed using COX Fluorescent Inhibitor Screening Assay Kit (Cayman Chemical, Ann Arbor, MI, USA) following manufacturer's instructions. COX-1 inhibitor SC 560 (5 nM) and COX-2 inhibitor DUP 697 (25 nM) were used as controls<sup>14,15</sup>.

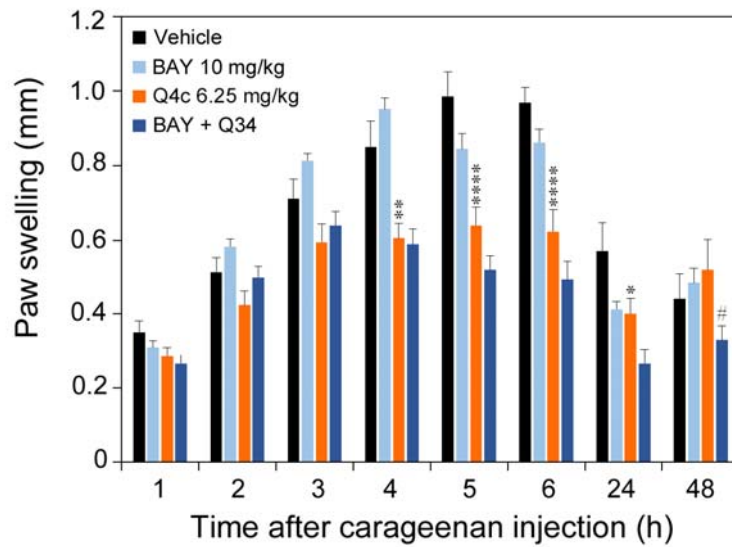

**Supplementary Figure 7.** The effect of NF- $\kappa$ B antagonist BAY 11-7082 on the *in vivo* anti-inflammatory activity of Q4c. The data of vehicle and Q4c in this figure were from the same experiments as represented in Fig. 5B. Data are shown as mean  $\pm$  SEM ( $n = 7$ ). Significant difference from vehicle, \*,  $p < 0.05$ ; \*\*,  $p < 0.01$ ; \*\*\*,  $p < 0.005$ ; \*\*\*\*,  $p < 0.001$ . Significant difference between Q4c treatment in the absence and presence of BAY 11-7082, #,  $p < 0.05$ . Statistical analysis was performed by two-way ANOVA, followed by Tukey post-tests.

## Supplementary References

1. Sun YL, Zhang XY, Sun T, He N, Li JY, Zhuang Y, *et al.* The anti-inflammatory potential of neuropeptide FF in vitro and in vivo. *Peptides* 2013, **47**(1): 124-132.
2. Sun YL, Zhang XY, He N, Sun T, Zhuang Y, Fang Q, *et al.* Neuropeptide FF activates ERK and NF kappa B signal pathways in differentiated SH-SY5Y cells. *Peptides* 2012, **38**(1): 110-117.
3. Ding AH, Nathan CF, Stuehr DJ. Release of reactive nitrogen intermediates and reactive oxygen intermediates from mouse peritoneal macrophages. Comparison of activating cytokines and evidence for independent production. *J Immunol* 1988, **141**(7): 2407-2412.
4. Rotelli AE, Guardia T, Juarez AO, de la Rocha NE, Pelzer LE. Comparative study of flavonoids in experimental models of inflammation. *Pharmacol Res* 2003, **48**(6): 601-606.
5. Schiantarelli P, Cadel S, Acerbi D, Pavesi L. Antiinflammatory activity and bioavailability of percutaneous piroxicam. *Arzneimittelforschung* 1982, **32**(3): 230-235.
6. Tubaro A, Dri P, Delbello G, Zilli C, Della Loggia R. The croton oil ear test revisited. *Agents Actions* 1986, **17**(3-4): 347-349.
7. Tubaro A, Dri P, Melato M, Mulas G, Bianchi P, Del Negro P, *et al.* In the croton oil ear test the effects of non steroidal antiinflammatory drug (NSAIDs) are dependent on the dose of the irritant. *Agents Actions* 1986, **19**(5-6): 371-373.
8. Berg DJ, Leach MW, Kuhn R, Rajewsky K, Muller W, Davidson NJ, *et al.* Interleukin 10 but not interleukin 4 is a natural suppressant of cutaneous inflammatory responses. *J Exp Med* 1995, **182**(1): 99-108.
9. Henriques MG, Silva PM, Martins MA, Flores CA, Cunha FQ, Assreuy-Filho J, *et al.* Mouse paw edema. A new model for inflammation? *Braz J Med Biol Res* 1987, **20**(2): 243-249.
10. Fukawa K, Kawano O, Hibi M, Misaki N, Ohba S, Hatanaka Y. A method for evaluating analgesic agents in rats. *J Pharmacol Methods* 1980, **4**(3): 251-259.
11. Ribeiro RA, Vale ML, Thomazzi SM, Paschoalato AB, Poole S, Ferreira SH, *et al.* Involvement of resident macrophages and mast cells in the writhing nociceptive response induced by zymosan and acetic acid in mice. *Eur J Pharmacol* 2000, **387**(1): 111-118.
12. Jiang XX, Sun YL, Yao J, Cao YM, Kai M, He N, *et al.* Core Scaffold-Inspired Concise Synthesis of Chiral Spirooxindole-Pyranopyrimidines with Broad-Spectrum Anticancer Potency. *Adv Synth Catal* 2012, **354**(5): 917-925.
13. Sun YL, Liu J, Sun T, Zhang XY, Yao J, Kai M, *et al.* Anti-cancer small molecule JP-8g exhibits potent in vivo anti-inflammatory activity. *Sci Rep* 2014, **4**: 4372.
14. Kargman S, Wong E, Greig GM, Falgueyret JP, Cromlish W, Ethier D, *et al.* Mechanism of selective inhibition of human prostaglandin G/H synthase-1 and -2 in intact cells. *Biochem Pharmacol* 1996, **52**(7): 1113-1125.

15. Smith CJ, Zhang Y, Koboldt CM, Muhammad J, Zweifel BS, Shaffer A, *et al.* Pharmacological analysis of cyclooxygenase-1 in inflammation. *Proc Natl Acad Sci U S A* 1998, **95**(22): 13313-13318.

## Characterization of Synthesized Compounds

### 1. NMR, MS and HPLC data of synthesized compounds

(*S*)-2'-amino-2-oxo-6'-phenylspiro[indoline-3,4'-pyran]-3',5'-dicarbonitrile (**Q4a**)

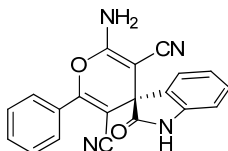

The title compound was isolated by column chromatography (CH<sub>2</sub>Cl<sub>2</sub>/EtOAc = 4/1) in 94% yield as white solid with a melting point (mp) of 178 °C.

<sup>1</sup>H NMR (300 MHz, [D<sup>6</sup>]DMSO): δ 10.86(s, 1 H), 7.81-7.81(d, *J* = 1.5 Hz, 2 H), 7.56-7.79(m, 5 H), 7.44-7.46(d, *J* = 7.2 Hz, 1 H), 7.30-7.36(m, 1 H), 7.08-7.13(t, *J* = 6.9 Hz, 1 H), 6.92-6.95(d, *J* = 7.8 Hz, 1 H)

<sup>13</sup>C NMR (75 MHz, [D<sup>6</sup>]DMSO): δ 176.4, 159.8, 159.6, 141.5, 132.1, 131.2, 130.1, 129.5, 128.8, 127.9, 125.3, 122.9, 117.0, 115.4, 110.2, 87.5, 53.9, 50.2.

HRMS-ESI (*m/z*): calculated for C<sub>20</sub>H<sub>12</sub>N<sub>4</sub>O<sub>2</sub>+Na<sup>+</sup>: 363.0852; found: 363.0846, 1.7ppm.

IR: 3427.4, 2206.7, 1726.8, 1668.3, 1627.8, 1470.2, 1412.1, 1318.9, 1262.2, 1152.8, 744.3, 671.0 cm<sup>-1</sup>.

HPLC: ee was determined by HPLC analysis (Chiralcel AD-H, *i*-PrOH/ Hexane = 30/70, 1.0 mL/min, 246 nm.) Retention time: *t*<sub>minor</sub> = 8.89 min, *t*<sub>major</sub> = 7.24 min, ee = 99%.

(*S*)-2'-amino-5-fluoro-2-oxo-6'-phenylspiro[indoline-3,4'-pyran]-3',5'-dicarbonitrile (**Q4b**)

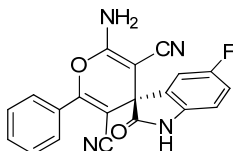

The title compound was isolated by column chromatography (CH<sub>2</sub>Cl<sub>2</sub>/EtOAc = 4/1) in 78% yield as white solid with an mp of 189 °C.

<sup>1</sup>H NMR (300 MHz, [D<sup>6</sup>]DMSO): δ 10.89(s, 1 H), 7.79-7.82(m, 2 H), 7.72(s, 2 H), 7.51-7.64(m, 4 H), 7.14-7.21(m, 1 H), 6.91-6.96(m, 1 H).

<sup>13</sup>C NMR (75 MHz, [D<sup>6</sup>]DMSO): δ 176.5, 160.0, 159.6, 157.1, 137.7, 132.8, 132.1, 129.5, 128.8, 128.0, 117.0, 116.8, 116.5, 115.3, 113.5, 113.2, 111.1, 86.9, 53.4, 50.7.

HRMS-ESI (*m/z*): calculated for C<sub>20</sub>H<sub>11</sub>FN<sub>4</sub>O<sub>2</sub>+Na<sup>+</sup>: 381.0758; found: 381.0751, 1.8ppm.

IR: 3280.8, 2200.3, 1729.6, 1669.0, 1630.5, 1594.1, 1486.1, 1412.9, 1318.4, 1271.7, 1155.7, 687.9, 599.0 cm<sup>-1</sup>.

HPLC: ee was determined by HPLC analysis (Chiralcel AD-H, *i*-PrOH/ Hexane = 15/85, 1.0 mL/min, 254 nm.) Retention time: *t*<sub>minor</sub> = 18.51 min, *t*<sub>major</sub> = 15.98 min, ee = >99%.

(*S*)-2'-amino-7-fluoro-2-oxo-6'-phenylspiro[indoline-3,4'-pyran]-3',5'-dicarbonitrile (**Q4c**)

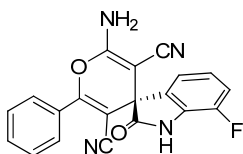

The title compound was isolated by column chromatography ( $\text{CH}_2\text{Cl}_2/\text{EtOAc} = 4/1$ ) in 92% yield as white solid with an mp of 220 °C.

**$^1\text{H}$  NMR** (300 MHz,  $[\text{D}^6]\text{DMSO}$ ):  $\delta$  11.45(s, 1 H), 7.75-7.83(m, 4 H), 7.56-7.65(m, 3 H), 7.35-7.38(d,  $J = 7.5\text{Hz}$ , 1 H), 7.26-7.32(t,  $J = 18.0\text{Hz}$  1 H), 7.11-7.18(m, 1 H).

**$^{13}\text{C}$  NMR** (75 MHz,  $[\text{D}^6]\text{DMSO}$ ):  $\delta$  176.8, 160.5, 160.1, 134.4, 132.7, 129.9, 129.3, 128.4, 122.0, 117.5, 117.4, 115.8, 87.4, 53.9, 51.1, 40.8, 40.5, 40.2, 39.9, 39.7, 39.4, 39.1.

**HRMS-ESI** ( $m/z$ ): calculated for  $\text{C}_{20}\text{H}_{11}\text{FN}_4\text{O}_2 + \text{H}^+$ : 359.0939; found: 359.0955, 4.4ppm.

**IR**: 3349.3, 2926.2, 2201.1, 1724.2, 1667.3, 1462.0, 1409.4, 1369.9, 1316.2, 1253.6, 1203.2, 1152.7, 1086.7, 1039.0, 869.4  $\text{cm}^{-1}$ .

**HPLC**: ee was determined by HPLC analysis (Chiralcel AD-H, *i*-PrOH/ Hexane = 30/70, 1.0 mL/min, 254 nm.) Retention time:  $t_{\text{minor}} = 9.15$  min,  $t_{\text{major}} = 7.37$  min, ee = 93%.

(*S*)-2'-amino-5-methoxy-2-oxo-6'-phenylspiro[indoline-3,4'-pyran]-3',5'-dicarbonitrile (**Q4d**)

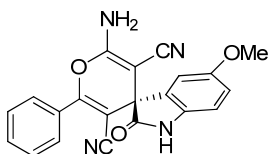

The title compound was isolated by column chromatography ( $\text{CH}_2\text{Cl}_2/\text{EtOAc} = 4/1$ ) in 84% yield as white solid with an mp of 193 °C.

**$^1\text{H}$  NMR** (300 MHz,  $[\text{D}^6]\text{DMSO}$ ):  $\delta$  10.67(s, 1 H), 7.79-7.82(m, 2 H), 7.58-7.64(m, 5 H), 7.13-7.14(d,  $J = 2.4$  Hz, 1 H), 6.83-6.91(m, 2 H), 3.75(s, 3 H).

**$^{13}\text{C}$  NMR** (75 MHz,  $[\text{D}^6]\text{DMSO}$ ):  $\delta$  176.3, 159.7, 159.5, 155.7, 134.6, 132.5, 132.1, 129.6, 128.8, 128.0, 117.1, 115.5, 115.0, 111.8, 110.7, 87.5, 55.5, 54.0, 50.7.

**HRMS-ESI** ( $m/z$ ): calculated for  $\text{C}_{21}\text{H}_{14}\text{N}_4\text{O}_3 + \text{Na}^+$ : 393.0958; found: 393.0955, 0.8ppm.

**IR**: 3280.1, 3176.1, 2203.4, 1716.7, 1670.1, 1630.4, 1601.8, 1491.2, 1407.6, 1301.2, 1268.0, 1203.1, 1157.1, 1025.5, 772.6, 686.2, 632.0, 599.3  $\text{cm}^{-1}$ .

**HPLC**: ee was determined by HPLC analysis (Chiralcel AD-H, *i*-PrOH/ Hexane = 15/85, 1.0 mL/min, 254 nm.) Retention time:  $t_{\text{minor}} = 10.43$  min,  $t_{\text{major}} = 8.06$  min, ee = 94%.

(*S*)-2'-amino-1-methyl-2-oxo-6'-phenylspiro[indoline-3,4'-pyran]-3',5'-dicarbonitrile (**Q4e**)

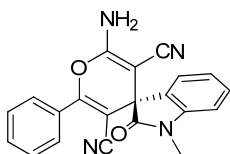



The title compound was isolated by column chromatography (CH<sub>2</sub>Cl<sub>2</sub>/EtOAc = 8/1) in 80% yield as white solid with an mp of 190 °C.

**<sup>1</sup>H NMR** (300 MHz, [D<sup>6</sup>]DMSO): δ 7.80-7.82(d, *J* = 6.9 Hz, 2 H), 7.72(s, 2 H), 7.42-7.64(m, 5 H), 7.16-7.22(m, 2 H), 2.23-2.34(d, *J* = 32.4 Hz, 3 H).

**<sup>13</sup>C NMR** (75 MHz, [D<sup>6</sup>]DMSO): δ 174.8, 160.0, 159.7, 142.9, 132.2, 130.4, 130.2, 129.5, 128.8, 127.9, 125.1, 123.6, 116.9, 115.2, 109.2, 87.3, 53.6, 49.8, 26.6.

**HRMS-ESI** (*m/z*): calculated for C<sub>21</sub>H<sub>14</sub>N<sub>4</sub>O<sub>2</sub>+Na<sup>+</sup>: 377.1009; found: 377.1003, 1.6ppm.

**IR**: 3427.2, 2202.4, 1711.8, 1663.9, 1468.4, 1414.8, 1366.0, 1308.0, 1264.3, 1148.5, 747.7, 576.5 cm<sup>-1</sup>.

**HPLC**: ee was determined by HPLC analysis (Chiralcel AD-H, *i*-PrOH/ Hexane = 30/70, 1.0 mL/min, 277 nm.) Retention time: *t*<sub>minor</sub> = 11.10 min, *t*<sub>major</sub> = 7.53 min, ee = 95%.

(*S*)-1-allyl-2'-amino-2-oxo-6'-phenylspiro[indoline-3,4'-pyran]-3',5'-dicarbonitrile (**Q4f**)

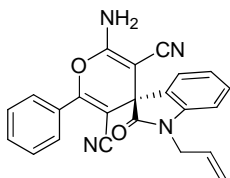

The title compound was isolated by column chromatography (CH<sub>2</sub>Cl<sub>2</sub>/EtOAc = 8/1) in 99% yield. White solid, mp 206 °C.

**<sup>1</sup>H NMR** (300 MHz, [D<sup>6</sup>]DMSO): δ 7.80-7.83(m, 2 H), 7.74(s, 1 H), 7.54-7.67(m, 4 H), 7.39-7.44(t, *J* = 7.5 Hz, 1 H), 7.17-7.22(t, *J* = 7.2 Hz, 1 H), 7.04-7.07(d, *J* = 7.8 Hz, 1 H), 5.79-5.91(m, 1 H), 5.15-5.25(m, 2 H), 4.40(s, 2 H);

**<sup>13</sup>C NMR** (75 MHz, [D<sup>6</sup>]DMSO): δ 174.7, 160.1, 159.7, 142.0, 132.2, 130.9, 130.4, 130.1, 129.5, 128.8, 128.0, 125.2, 123.6, 116.9, 116.4, 115.4, 109.8, 87.2, 53.6, 49.9, 41.9.

**HRMS-ESI** (*m/z*): calculated for C<sub>23</sub>H<sub>16</sub>N<sub>4</sub>O<sub>2</sub>+Na<sup>+</sup>: 403.1165; found: 403.1169, 1.0ppm.

**IR**: 3448.4, 3299.9, 2200.6, 1709.0, 11669.5, 1603.1, 1467.3, 1409.4, 1362.2, 1305.9, 1189.5, 1149.0, 921.7, 756.1, 699.4 cm<sup>-1</sup>.

**HPLC**: ee was determined by HPLC analysis (Chiralcel AD-H, *i*-PrOH/ Hexane = 30/70, 1.0 mL/min, 277 nm.) Retention time: *t*<sub>minor</sub> = 13.69 min, *t*<sub>major</sub> = 8.26 min, ee = 95%.

(*S*)-2'-amino-2-oxo-1,6'-diphenylspiro[indoline-3,4'-pyran]-3',5'-dicarbonitrile (**Q4g**)

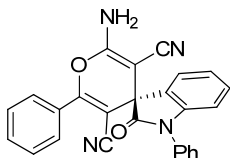

The title compound was isolated by column chromatography (CH<sub>2</sub>Cl<sub>2</sub>/EtOAc = 8/1) in 87% yield as white solid with an mp of 190 °C.

**<sup>1</sup>H NMR** (300 MHz, [D<sup>6</sup>]DMSO): δ 7.83-7.86(m, 4 H), 7.51-7.82(m, 7 H), 7.38-7.42(m, 3 H), 7.24-7.29(t, *J* = 7.5 Hz, 1 H), 6.81-6.83(d, *J* = 7.8 Hz, 1 H).

**<sup>13</sup>C NMR** (75 MHz, [D<sup>6</sup>]DMSO): δ 174.6, 160.0, 159.6, 142.6, 133.6, 132.3, 130.4, 130.3, 130.0, 129.4, 128.9, 128.7, 128.0, 126.4, 125.7, 124.3, 115.3, 109.5, 87.1, 79.1, 53.6, 50.1.

**HRMS-ESI** (*m/z*): calculated for C<sub>26</sub>H<sub>16</sub>N<sub>4</sub>O<sub>2</sub>+Na<sup>+</sup>: 439.1165; found: 439.1153, 2.7ppm.

**IR**: 3390.2, 2198.0, 1725.4, 1607.1, 1498.7, 1466.1, 1367.7, 1313.5, 1152.5, 1026.5, 823.9, 757.1, 697.4 cm<sup>-1</sup>.

**HPLC**: ee was determined by HPLC analysis (Chiralcel AD-H, *i*-PrOH/ Hexane = 30/70, 1.0 mL/min, 254 nm.) Retention time: *t*<sub>minor</sub> = 21.22 min, *t*<sub>major</sub> = 10.30 min, ee = 98%.

(*S*)-2'-amino-1-benzyl-2-oxo-6'-phenylspiro[indoline-3,4'-pyran]-3',5'-dicarbonitrile (**Q4h**)

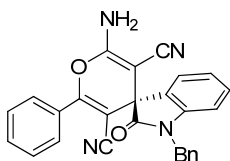

The title compound was isolated by column chromatography (CH<sub>2</sub>Cl<sub>2</sub>/EtOAc = 8/1) in 89% yield as white solid with an mp of 188 °C.

**<sup>1</sup>H NMR** (300 MHz, [D<sup>6</sup>]DMSO): δ 7.82-7.84(d, *J* = 6.9 Hz, 2 H), 7.76(s, 2 H), 7.55-7.65(m, 4 H), 7.26-7.39(m, 6 H), 7.15-7.20(t, *J* = 7.5 Hz, 1 H), 6.95-6.98(d, *J* = 7.8 Hz, 1 H), 5.02(s, 2 H).

**<sup>13</sup>C NMR** (75 MHz, [D<sup>6</sup>]DMSO): δ 175.2, 160.2, 159.8, 142.0, 135.4, 132.2, 130.5, 130.2, 129.5, 128.8, 128.5, 128.0, 127.5, 127.0, 125.3, 123.8, 117.0, 115.4, 109.9, 87.2, 53.7, 49.9, 43.2.

**HRMS-ESI** (*m/z*): calculated for C<sub>27</sub>H<sub>18</sub>N<sub>4</sub>O<sub>2</sub>+Na<sup>+</sup>: 453.1322; found: 453.1332, 2.2ppm. **IR**: 3338.9, 3176.6, 2205.9, 1705.1, 1673.3, 1609.3, 1364.9, 1305.4, 1147.5, 744.4, 688.5 cm<sup>-1</sup>.

**HPLC**: ee was determined by HPLC analysis (Chiralcel AD-H, *i*-PrOH/ Hexane = 30/70, 1.0 mL/min, 254 nm.) Retention time: *t*<sub>minor</sub> = 18.51 min, *t*<sub>major</sub> = 21.05 min, ee = 96%.

(*S*)-1-acetyl-2'-amino-2-oxo-6'-phenylspiro[indoline-3,4'-pyran]-3',5'-dicarbonitrile (**Q4i**)

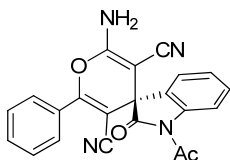

The title compound was isolated by column chromatography (CH<sub>2</sub>Cl<sub>2</sub>/EtOAc = 8/1) in 85% yield as white solid with an mp of 210 °C.

**<sup>1</sup>H NMR** (300 MHz, [D<sup>6</sup>]DMSO): δ 8.15-8.18(d, *J* = 8.1 Hz, 1 H), 7.93(s, 2 H), 7.84-7.86(d, *J* = 6.6 Hz, 2 H), 7.58-7.69(m, 4 H), 7.49-7.55(t, *J* = 7.5 Hz, 1 H), 7.38-7.43(t, *J* = 7.5 Hz, 1 H), 2.65(s, 2 H).

**<sup>13</sup>C NMR** (75 MHz, [D<sup>6</sup>]DMSO): δ 176.3, 170.3, 160.5, 159.8, 139.2, 132.4, 130.5, 129.3, 129.2, 128.8, 128.1, 126.4, 125.6, 116.6, 115.9, 115.1, 86.9, 53.8, 50.9, 26.1.

**HRMS-ESI** (*m/z*): calculated for C<sub>22</sub>H<sub>14</sub>N<sub>4</sub>O<sub>3</sub>+Na<sup>+</sup>: 405.0958; found: 405.0948, 2.5ppm.

**IR**: 3381.5, 2923.3, 2205.8, 1750.4, 1716.2, 1672.4, 1624.6, 1595.5, 1465.9, 1410.6, 1370.7, 1303.4, 1262.2, 1157.7, 757.9, 694.6, 532.1 cm<sup>-1</sup>.

**HPLC:** ee was determined by HPLC analysis (Chiralcel AD-H, *i*-PrOH/ Hexane = 30/70, 1.0 mL/min, 254nm.) Retention time:  $t_{\text{minor}} = 8.23$  min,  $t_{\text{major}} = 7.22$  min, ee = >99%.

(*S*)-1-allyl-2'-amino-7-fluoro-2-oxo-6'-phenylspiro[indoline-3,4'-pyran]-3',5'-dicarbonitrile (**Q4j**)

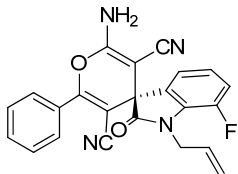

The title compound was isolated by column chromatography (CH<sub>2</sub>Cl<sub>2</sub>/EtOAc = 8/1) in 93% yield as white solid with an mp of 207 °C.

**<sup>1</sup>H NMR** (300 MHz, [D<sup>6</sup>]DMSO): δ 7.80-7.83(m, 4 H), 7.56-7.68(m, 3 H), 7.46-7.49(s, 1 H), 7.30-7.36(m, 1 H), 7.20-7.27(m, 1 H), 5.89-5.98(m, 1 H), 5.15-5.21(m, 2 H), 4.47(s, 2 H).

**<sup>13</sup>C NMR** (75 MHz, [D<sup>6</sup>]DMSO): δ 174.6, 160.3, 159.7, 133.3, 132.3, 131.9, 129.4, 128.8, 128.6, 128.0, 124.9, 124.9, 121.8, 118.3, 118.1, 116.8, 115.6, 115.2, 86.7, 53.3, 50.2, 43.8.

**HRMS-ESI** ( $m/z$ ): calculated for C<sub>23</sub>H<sub>15</sub>FN<sub>4</sub>O<sub>2</sub>+Na<sup>+</sup>: 421.1071; found: 421.1077, 1.4ppm.

**IR:** 3449.9, 3290.7, 3164.9, 2924.6, 2854.9, 2198.0, 1711.5, 1669.4, 1622.0, 1593.7, 1469.1, 1410.2, 1356.3, 1304.9, 1245.2, 1187.4, 1149.0, 989.9, 920.1, 783.9, 744.0, 698.5, 521.7 cm<sup>-1</sup>.

**HPLC:** ee was determined by HPLC analysis (Chiralcel AD-H, *i*-PrOH/ Hexane = 30/70, 1.0 mL/min, 277 nm.) Retention time:  $t_{\text{minor}} = 11.37$  min,  $t_{\text{major}} = 7.53$  min, ee = 95%.

(*S*)-1-allyl-2'-amino-5-chloro-2-oxo-6'-phenylspiro[indoline-3,4'-pyran]-3',5'-dicarbonitrile (**Q4k**)

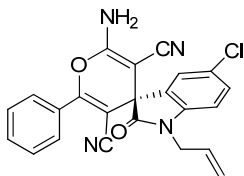

The title compound was isolated by column chromatography (CH<sub>2</sub>Cl<sub>2</sub>/EtOAc = 8/1) in 80% yield as white solid with an mp of 244 °C.

**<sup>1</sup>H NMR** (300 MHz, [D<sup>6</sup>]DMSO): δ 7.80-7.84(m, 5 H), 7.71(s, 2 H), 7.56-7.65(m, 3 H), 7.47-7.51(m, 1 H), 7.08-7.11(d,  $J = 8.4$  Hz, 1 H), 5.76-5.89(m, 1 H), 5.15-5.24(m, 2 H), 4.41-4.42(d,  $J = 4.5$  Hz, 2 H).

**<sup>13</sup>C NMR** (75 MHz, [D<sup>6</sup>]DMSO): δ 174.5, 160.4, 159.7, 140.9, 132.4, 132.2, 130.7, 130.1, 129.5, 128.8, 128.0, 127.8, 125.7, 116.9, 116.5, 115.4, 111.4, 86.4, 53.1, 50.1, 42.0.

**HRMS-ESI** ( $m/z$ ): calculated for C<sub>23</sub>H<sub>15</sub>ClN<sub>4</sub>O<sub>2</sub>+Na<sup>+</sup>:437.0776; found: 437.0766, 2.4ppm.

**IR:** 3338.6, 3181.7, 2209.1, 1709.2, 1672.5, 1633.8, 1601.3, 1483.2, 1413.6, 1349.6, 1300.5, 1252.9, 1193.0, 1156.0, 1075.9, 820.7, 760.5, 689.6, 586.3, 560.6 cm<sup>-1</sup>.

**HPLC:** ee was determined by HPLC analysis (Chiralcel AD-H, *i*-PrOH/ Hexane = 30/70, 1.0 mL/min, 277 nm.) Retention time:  $t_{\text{minor}} = 12.10$  min,  $t_{\text{major}} = 6.26$  min, ee = >99%.

(*S*)-1-allyl-2'-amino-7-chloro-2-oxo-6'-phenylspiro[indoline-3,4'-pyran]-3',5'-dicarbonitrile (**Q4l**)

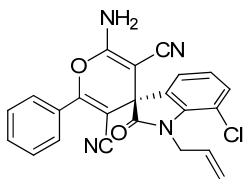

The title compound was isolated by column chromatography (CH<sub>2</sub>Cl<sub>2</sub>/EtOAc = 8/1) in 87% yield as white solid with an mp of 194 °C.

**<sup>1</sup>H NMR** (300 MHz, [D<sup>6</sup>]DMSO): δ 7.80-7.83(m, 4 H), 7.56-7.65(m, 4 H), 7.43-7.46(m, 1 H), 7.21-7.26(t, *J* = 7.8 Hz, 1 H), 5.92-6.03(m, 1 H), 5.11-5.18(m, 2 H), 4.69-4.69(d, *J* = 1.8 Hz, 2 H).

**<sup>13</sup>C NMR** (75 MHz, [D<sup>6</sup>]DMSO): δ 175.4, 160.4, 159.7, 137.8, 133.5, 132.7, 132.4, 132.3, 129.3, 128.8, 128.0, 125.1, 124.8, 116.8, 115.3, 115.2, 114.6, 86.6, 53.4, 49.7, 43.5.

**HRMS-ESI** (*m/z*): calculated for C<sub>23</sub>H<sub>15</sub>ClN<sub>4</sub>O<sub>2</sub>+Na<sup>+</sup>: 437.0776; found: 437.0779, 0.7ppm.

**IR**: 3392.1, 3309.4, 3189.7, 2924.8, 2207.7, 1713.2, 1669.6, 1593.4, 1454.5, 1409.9, 1356.1, 1314.5, 1154.5, 744.2, 691.3 cm<sup>-1</sup>.

**HPLC**: ee was determined by HPLC analysis (Chiralcel AD-H, *i*-PrOH/ Hexane = 30/70, 1.0 mL/min, 254 nm.) Retention time: *t*<sub>minor</sub> = 9.06 min, *t*<sub>major</sub> = 7.29 min, ee = 97%.

(*S*)-1-allyl-2'-amino-5-chloro-7-methyl-2-oxo-6'-phenylspiro[indoline-3,4'-pyran]-3',5'-dicarbonitrile (**Q4m**)

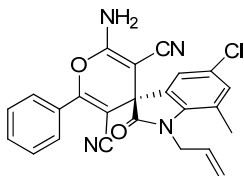

The title compound was isolated by column chromatography (CH<sub>2</sub>Cl<sub>2</sub>/EtOAc = 8/1) in 99% yield as white solid with an mp of 203 °C.

**<sup>1</sup>H NMR** (300 MHz, [D<sup>6</sup>]DMSO): δ 7.77-7.98(m, 4 H), 7.56-7.71(m, 4 H), 7.30-7.36(m, 1 H), 5.96-6.07(m, 1 H), 5.10-5.20(m, 2 H), 4.56(s, 2 H), 2.47-2.51(m, 3 H).

**<sup>13</sup>C NMR** (75 MHz, [D<sup>6</sup>]DMSO): δ 175.4, 160.4, 159.7, 139.0, 133.3, 133.2, 132.2, 129.5, 128.1, 127.5, 123.5, 122.3, 117.0, 115.5, 114.9, 86.7, 53.6, 49.5, 43.6, 17.3.

**HRMS-ESI** (*m/z*): calculated for C<sub>24</sub>H<sub>17</sub>ClN<sub>4</sub>O<sub>2</sub>+Na<sup>+</sup>: 451.0932; found: 451.0925, 1.6ppm.

**IR**: 3349.4, 3184.9, 2924.4, 2854.8, 2208.9, 1706.4, 1674.3, 1599.6, 1459.6, 1411.5, 1341.7, 1302.7, 1237.0, 1183.4, 1152.6, 688.8, 599.1, 559.0 cm<sup>-1</sup>.

**HPLC**: ee was determined by HPLC analysis (Chiralcel AD-H, *i*-PrOH/ Hexane = 30/70, 1.0 mL/min, 254 nm.) Retention time: *t*<sub>minor</sub> = 9.11 min, *t*<sub>major</sub> = 6.26 min, ee = 99%.

(*S*)-1-allyl-2'-amino-5-bromo-2-oxo-6'-phenylspiro[indoline-3,4'-pyran]-3',5'-dicarbonitrile (**Q4n**)

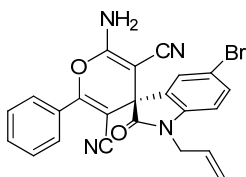

The title compound was isolated by column chromatography (CH<sub>2</sub>Cl<sub>2</sub>/EtOAc = 8/1) in 90% yield as white solid with an mp of 245 °C.

**<sup>1</sup>H NMR** (300 MHz, [D<sup>6</sup>]DMSO): δ 7.93(s, 1 H), 7.80-7.92(m, 4 H), 7.56-7.65(m, 4 H), 7.03-7.05(d, *J* = 8.4 Hz, 1 H), 5.76-5.88(m, 1 H), 5.15-5.23(m, 2 H), 4.40-4.4.14(d, *J* = 3.6 Hz, 1 H).

**<sup>13</sup>C NMR** (75 MHz, [D<sup>6</sup>]DMSO): δ 174.4, 160.4, 159.7, 141.3, 133.0, 132.7, 132.2, 130.7, 129.5, 128.8, 128.3, 128.1, 116.9, 116.5, 115.5, 115.4, 111.9, 86.4, 53.1, 50.0, 42.0.

**HRMS-ESI** (*m/z*): calculated for C<sub>23</sub>H<sub>15</sub>BrN<sub>4</sub>O<sub>2</sub>+Na<sup>+</sup>: 481.0271; found: 481.0262, 1.9ppm.

**IR**: 3344.1, 3184.9, 2209.1, 1704.5, 1671.6, 1632.6, 1602.9, 1479.5, 1413.7, 1349.0, 1298.3, 1155.7, 687.3, 582.4 cm<sup>-1</sup>.

**HPLC**: ee was determined by HPLC analysis (Chiralcel AD-H, *i*-PrOH/ Hexane = 30/70, 1.0 mL/min, 254 nm.) Retention time: *t*<sub>minor</sub> = 12.80 min, *t*<sub>major</sub> = 6.47 min, ee = >99%.

*(S)*-1-allyl-2'-amino-5-methyl-2-oxo-6'-phenylspiro[indoline-3,4'-pyran]-3',5'-dicarbonitrile (**Q4o**)

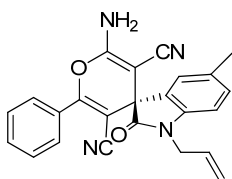

The title compound was isolated by column chromatography (CH<sub>2</sub>Cl<sub>2</sub>/EtOAc = 8/1) in 92% yield as white solid with an mp of 185 °C.

**<sup>1</sup>H NMR** (300 MHz, [D<sup>6</sup>]DMSO): δ 7.80-7.83(m, 2 H), 7.71(s, 2 H), 7.56-7.64(m, 3 H), 7.37(s, 1 H), 7.20-7.22(d, *J* = 7.8 Hz, 1 H), 6.92-6.95(d, *J* = 8.1 Hz, 1 H), 5.79-5.88(m, 1 H), 5.13-5.24(m, 2 H), 4.37-4.38(d, *J* = 3.9 Hz, 2 H), 2.33(s, 3 H).

**<sup>13</sup>C NMR** (75 MHz, [D<sup>6</sup>]DMSO): δ 174.6, 159.9, 159.6, 139.6, 132.8, 132.2, 131.0, 130.5, 130.4, 129.5, 128.8, 128.0, 125.6, 117.0, 116.3, 115.4, 109.6, 87.3, 53.8, 49.9, 41.9, 20.6.

**HRMS-ESI** (*m/z*): calculated for C<sub>24</sub>H<sub>18</sub>N<sub>4</sub>O<sub>2</sub>+Na<sup>+</sup>: 417.1322; found: 417.1313, 2.2ppm.

**IR**: 3311.7, 3175.1, 2208.2, 1703.0, 1670.8, 1599.4, 1495.0, 1410.2, 1357.8, 1304.7, 1150.7, 814.4, 693.2 cm<sup>-1</sup>.

**HPLC**: ee was determined by HPLC analysis (Chiralcel AD-H, *i*-PrOH/ Hexane = 30/70, 1.0 mL/min, 254 nm.) Retention time: *t*<sub>minor</sub> = 11.46 min, *t*<sub>major</sub> = 6.42 min, ee = >99%.

*(S)*-1-allyl-2'-amino-5-methoxy-2-oxo-6'-phenylspiro[indoline-3,4'-pyran]-3',5'-dicarbonitrile (**Q4p**)

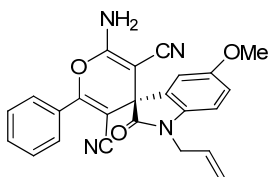

The title compound was isolated by column chromatography (CH<sub>2</sub>Cl<sub>2</sub>/EtOAc = 8/1) in 99% yield as white solid with an mp of 204 °C.

**<sup>1</sup>H NMR** (300 MHz, [D<sup>6</sup>]DMSO): δ 7.80-7.83(m, 2 H), 7.71(s, 2 H), 7.55-7.64(m, 3 H), 7.24(s, 1 H), 6.96-6.97(d, *J* = 1.2 Hz, 2 H), 5.76-5.88(m, 1 H), 5.14-5.24(m, 2 H), 4.36-4.37(d, *J* = 2.7 Hz, 2 H), 3.77(s, 3 H).

**<sup>13</sup>C NMR** (75 MHz, [D<sup>6</sup>]DMSO): δ 174.5, 160.0, 159.7, 156.3, 135.2, 132.1, 131.7, 131.1, 129.6, 128.8, 128.0, 117.0, 116.3, 115.4, 114.8, 112.0, 110.4, 87.2, 55.6, 53.8, 50.3, 41.9.

**HRMS-ESI** (*m/z*): calculated for C<sub>24</sub>H<sub>18</sub>N<sub>4</sub>O<sub>3</sub>+Na<sup>+</sup>: 433.1271; found: 433.1275, 0.9ppm.

**IR**: 3414.4, 3300.7, 3181.6, 2924.3, 2855.1, 2195.1, 1704.7, 1664.6, 1597.0, 1493.0, 1456.4, 1298.8, 1148.5, 1010.0, 769.6, 694.1, 527.8, 479.4 cm<sup>-1</sup>.

**HPLC**: ee was determined by HPLC analysis (Chiralcel AD-H, *i*-PrOH/ Hexane = 30/70, 1.0 mL/min, 320 nm.) Retention time: *t*<sub>minor</sub> = 17.98 min, *t*<sub>major</sub> = 9.39 min, ee = >99%.

(*S*)-2'-amino-6'-(3-chlorophenyl)-2-oxospiro[indoline-3,4'-pyran]-3',5'-dicarbonitrile (**Q4q**)

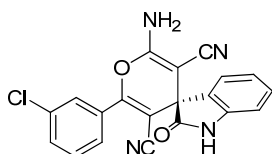

The title compound was isolated by column chromatography (CH<sub>2</sub>Cl<sub>2</sub>/EtOAc = 4/1) in 75% yield as white solid with an mp of 193 °C.

**<sup>1</sup>H NMR** (300 MHz, [D<sup>6</sup>]DMSO): δ 10.88(s, 1 H), 7.89(s, 1 H), 7.78-7.81(d, *J* = 7.8 Hz, 1 H), 7.59-7.74(m, 3 H), 7.46-7.49(d, *J* = 7.5 Hz, 1 H), 7.31-7.36(t, *J* = 7.2 Hz, 1 H), 7.09-7.14(t, *J* = 7.5 Hz, 1 H), 6.92-6.95(d, *J* = 7.8 Hz, 1 H).

**<sup>13</sup>C NMR** (75 MHz, [D<sup>6</sup>]DMSO): δ 176.3, 159.5, 158.2, 141.5, 133.5, 131.9, 131.4, 131.1, 130.8, 130.1, 127.7, 126.7, 126.7, 125.5, 122.9, 116.9, 115.1, 110.2, 88.4, 53.9, 50.2.

**HRMS-ESI** (*m/z*): calculated for C<sub>20</sub>H<sub>11</sub>ClN<sub>4</sub>O<sub>2</sub>+Na<sup>+</sup>: 397.0463; found: 397.0458, 1.3ppm.

**IR**: 3279.6, 3169.6, 2923.7, 2204.3, 1721.3, 1671.9, 1624.0, 1473.1, 1411.8, 1317.3, 1257.3, 1158.7, 747.1, 674.8 cm<sup>-1</sup>.

**HPLC**: ee was determined by HPLC analysis (Chiralcel AD-H, *i*-PrOH/ Hexane = 30/70, 1.0 mL/min, 254 nm.) Retention time: *t*<sub>minor</sub> = 8.58 min, *t*<sub>major</sub> = 6.51 min, ee = >99%.

(*S*)-2'-amino-6'-(4-chlorophenyl)-2-oxospiro[indoline-3,4'-pyran]-3',5'-dicarbonitrile (**Q4r**)

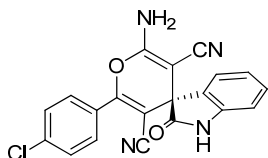

The title compound was isolated by column chromatography (CH<sub>2</sub>Cl<sub>2</sub>/EtOAc = 4/1) in 78% yield as white solid with an mp of 180 °C.

**<sup>1</sup>H NMR** (300 MHz, [D<sup>6</sup>]DMSO): δ 10.87(s, 1 H), 7.82-7.85(d, *J* = 8.7 Hz, 2 H), 7.67-7.70(m, 4 H), 7.45-7.47(d, *J* = 7.5 Hz, 1 H), 7.33(s, 1 H), 7.11-7.13(d, *J* = 7.5 Hz, 1 H), 6.92-6.95(d, *J* = 7.5 Hz, 1 H).

**<sup>13</sup>C NMR** (75 MHz, [D<sup>6</sup>]DMSO): δ 176.3, 159.5, 158.7, 141.5, 136.9, 131.1, 130.1, 129.8, 129.0, 128.3, 125.4, 122.9, 117.0, 115.2, 110.2, 87.9, 53.9, 50.2.

**HRMS-ESI** (*m/z*): calculated for C<sub>20</sub>H<sub>11</sub>CIN<sub>4</sub>O<sub>2</sub>+Na<sup>+</sup>: 397.0463; found: 397.0461, 0.5ppm.

**IR**: 3302.8, 3192.8, 2924.4, 2201.7, 1726.7, 1669.6, 1591.6, 1470.9, 1402.9, 1317.5, 1154.9, 1093.9, 741.0, 672.9 cm<sup>-1</sup>.

**HPLC**: ee was determined by HPLC analysis (Chiralcel AD-H, *i*-PrOH/ Hexane = 30/70, 1.0 mL/min, 254 nm.) Retention time: *t*<sub>minor</sub> = 16.05 min, *t*<sub>major</sub> = 8.03 min, ee = >99%.

(*S*)-2'-amino-2-oxo-6'-*m*-tolylspiro[indoline-3,4'-pyran]-3',5'-dicarbonitrile (**Q4s**)

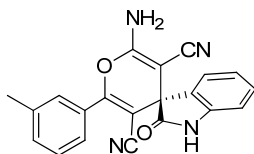

The title compound was isolated by column chromatography (CH<sub>2</sub>Cl<sub>2</sub>/EtOAc = 4/1) in 88% yield as white solid with an mp of 198 °C.

**<sup>1</sup>H NMR** (300 MHz, [D<sup>6</sup>]DMSO): δ 10.86(s, 1 H), 7.57-7.65(m, 4 H), 7.43-7.49(m, 3 H), 7.30-7.36(m, 1 H), 7.08-7.13(m, 1 H), 6.92-6.95(d, *J* = 7.8 Hz, 2 H), 2.38(s, 3 H).

**<sup>13</sup>C NMR** (75 MHz, [D<sup>6</sup>]DMSO): δ 176.4, 159.9, 159.6, 141.5, 138.3, 132.7, 131.3, 130.1, 129.5, 128.7, 128.2, 125.3, 125.1, 122.9, 117.0, 115.4, 110.2, 87.4, 53.9, 50.2, 20.8.

**HRMS-ESI** (*m/z*): calculated for C<sub>21</sub>H<sub>14</sub>N<sub>4</sub>O<sub>2</sub>+Na<sup>+</sup>: 377.1009; found: 377.1000, 2.4ppm.

**IR**: 3303.1, 3169.5, 2923.5, 2204.6, 1721.0, 1667.9, 1623.3, 1470.6, 1411.1, 1315.1, 1144.3, 741.2, 674.3 cm<sup>-1</sup>.

**HPLC**: ee was determined by HPLC analysis (Chiralcel AD-H, *i*-PrOH/ Hexane = 30/70, 1.0 mL/min, 254 nm.) Retention time: *t*<sub>minor</sub> = 7.79 min, *t*<sub>major</sub> = 6.85 min, ee = >99%.

(*S*)-2'-amino-2-oxo-6'-*p*-tolylspiro[indoline-3,4'-pyran]-3',5'-dicarbonitrile (**Q4t**)

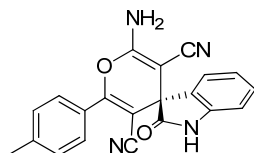

The title compound was isolated by column chromatography (CH<sub>2</sub>Cl<sub>2</sub>/EtOAc = 4/1) in 90% yield as white solid with an mp of 173 °C.

**<sup>1</sup>H NMR** (300 MHz, [D<sup>6</sup>]DMSO): δ 10.85(s, 1 H), 7.65-7.72(m, 4 H), 7.38-7.44(m, 3 H), 7.30-7.33(m, 1 H), 7.08-7.13(t, *J* = 7.5 Hz, 1 H), 6.92-6.94(d, *J* = 7.5 Hz, 2 H), 2.39(s, 3 H).

**<sup>13</sup>C NMR** (75 MHz, [D<sup>6</sup>]DMSO): δ 176.5, 159.7, 159.6, 142.4, 141.5, 131.3, 130.0, 129.3, 127.8, 126.7, 125.3, 122.9, 117.1, 115.6, 110.2, 86.7, 53.9, 50.2, 21.0.

**HRMS-ESI** (*m/z*): calculated for C<sub>21</sub>H<sub>14</sub>N<sub>4</sub>O<sub>2</sub>+Na<sup>+</sup>: 377.1009; found: 377.1001, 2.1ppm.

**IR**: 3342.9, 3180.5, 2205.3, 1720.3, 1667.2, 1619.5, 1470.1, 1407.8, 1310.5, 1151.3, 677.1 cm<sup>-1</sup>.

**HPLC**: ee was determined by HPLC analysis (Chiralcel AD-H, *i*-PrOH/ Hexane = 30/70, 1.0 mL/min, 254 nm.) Retention time: *t*<sub>minor</sub> = 9.62min, *t*<sub>major</sub> = 10.65 min, ee = 90%.



## 2. HPLC Chromatograms of racemic and chiral products

(*S*)-2'-amino-2-oxo-6'-phenylspiro[indoline-3,4'-pyran]-3',5'-dicarbonitrile (**Q4a**)

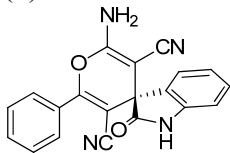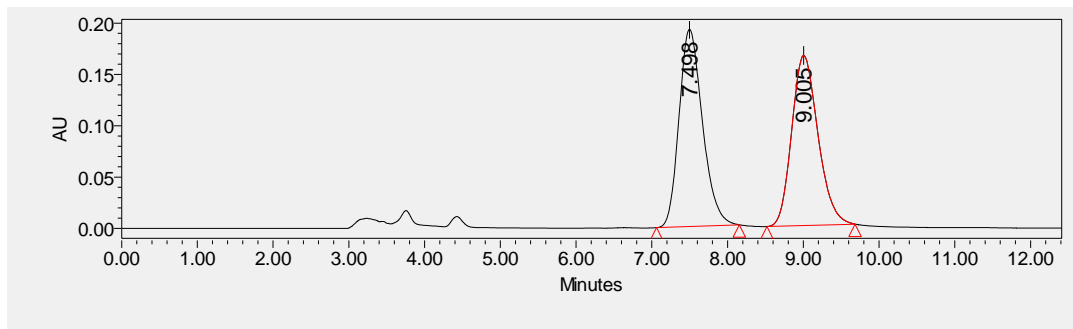

| Entry | Retention Time | Area    | Area (%) | Height | Int Type | Peak Type |
|-------|----------------|---------|----------|--------|----------|-----------|
| 1     | 7.498          | 4113817 | 50.78    | 192104 | bb       | Unknown   |
| 2     | 9.005          | 3988145 | 49.22    | 165690 | bb       | Unknown   |

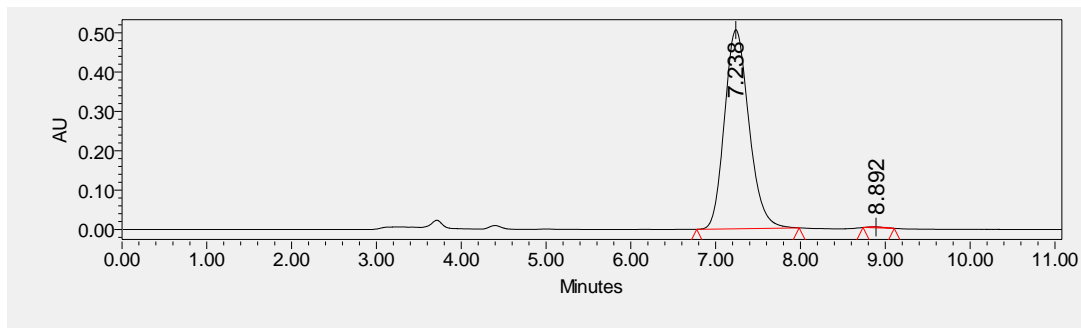

| Entry | Retention Time | Area     | Area (%) | Height | Int Type | Peak Type |
|-------|----------------|----------|----------|--------|----------|-----------|
| 1     | 7.238          | 10154857 | 99.70    | 505899 | bb       | Unknown   |
| 2     | 8.892          | 30387    | 0.30     | 2279   | bb       | Unknown   |

(S)-2'-amino-5-fluoro-2-oxo-6'-phenylspiro[indoline-3,4'-pyran]-3',5'-dicarbonitrile (**Q4b**)

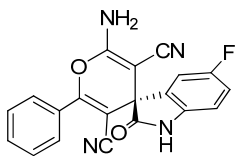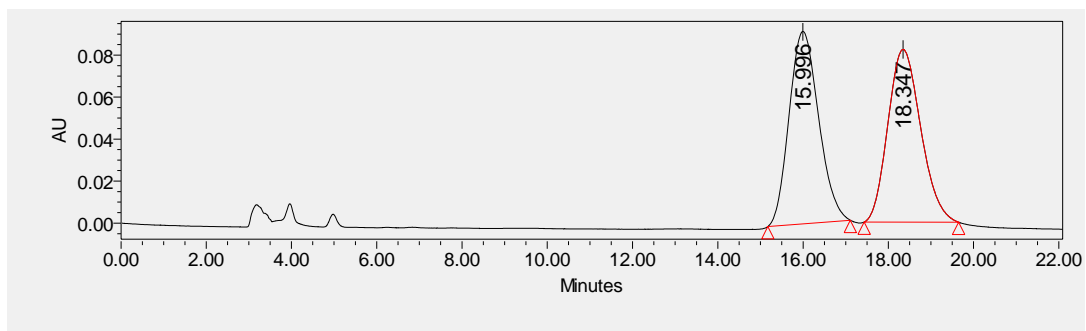

| Entry | Retention Time | Area    | Area (%) | Height | Int Type | Peak Type |
|-------|----------------|---------|----------|--------|----------|-----------|
| 1     | 15.996         | 4400793 | 50.03    | 91632  | bb       | Unknown   |
| 2     | 18.347         | 4396005 | 49.97    | 82231  | bb       | Unknown   |

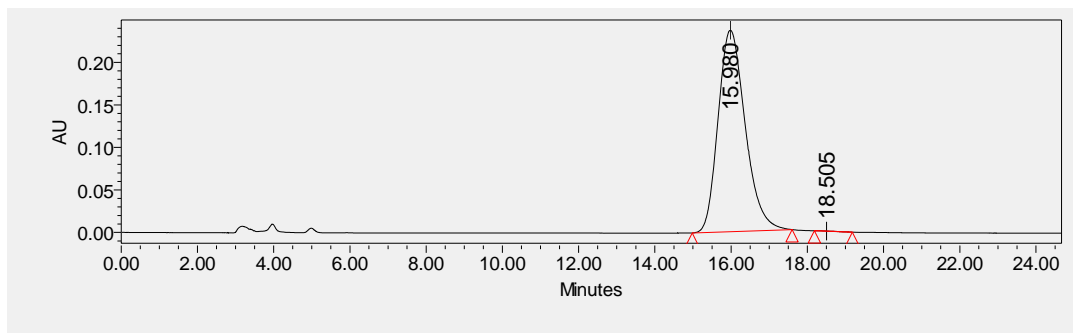

| Entry | Retention Time | Area     | Area (%) | Height | Int Type | Peak Type |
|-------|----------------|----------|----------|--------|----------|-----------|
| 1     | 15.980         | 11693491 | 99.96    | 236932 | bb       | Unknown   |
| 2     | 18.505         | 4287     | 0.04     | 169    | bb       | Unknown   |

(S)-2'-amino-7-fluoro-2-oxo-6'-phenylspiro[indoline-3,4'-pyran]-3',5'-dicarbonitrile (Q4c)

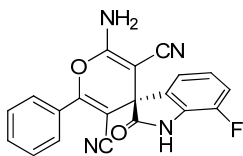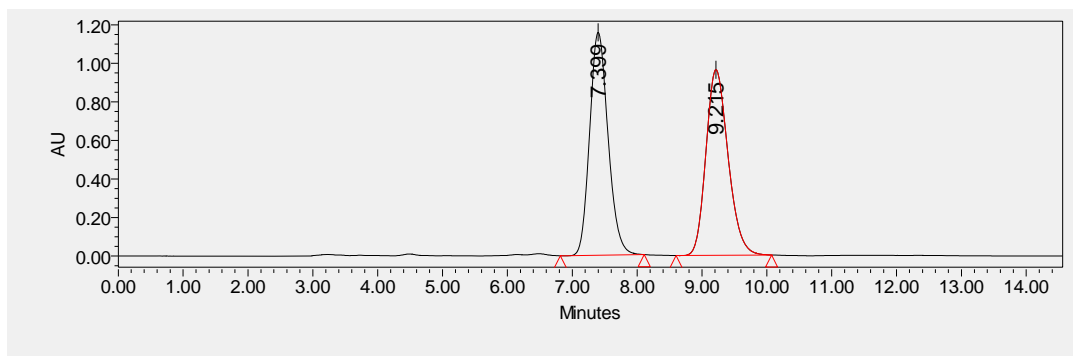

| Entry | Retention Time | Area     | Area (%) | Height  | Int Type | Peak Type |
|-------|----------------|----------|----------|---------|----------|-----------|
| 1     | 7.399          | 22810800 | 49.95    | 1156418 | bb       | Unknown   |
| 2     | 9.215          | 22858331 | 50.05    | 963370  | bb       | Unknown   |

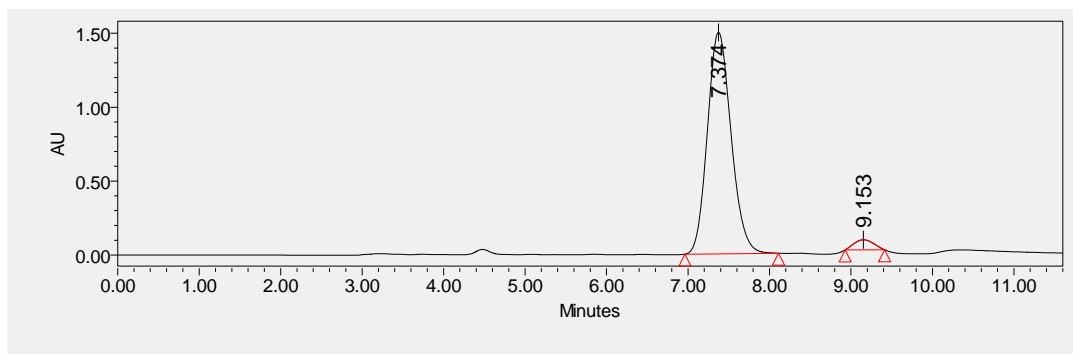

| Entry | Retention Time | Area     | Area (%) | Height  | Int Type | Peak Type |
|-------|----------------|----------|----------|---------|----------|-----------|
| 1     | 7.374          | 30287876 | 96.34    | 1497732 | bb       | Unknown   |
| 2     | 9.153          | 1151154  | 3.66     | 67973   | bb       | Unknown   |

(S)-2'-amino-5-methoxy-2-oxo-6'-phenylspiro[indoline-3,4'-pyran]-3',5'-dicarbonitrile (**Q4d**)

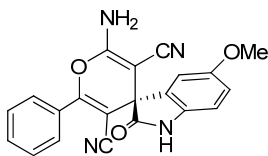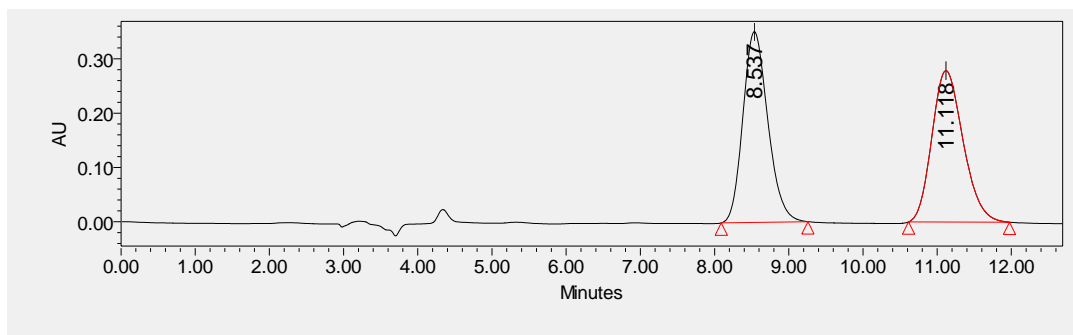

| Entry | Retention Time | Area    | Area (%) | Height | Int Type | Peak Type |
|-------|----------------|---------|----------|--------|----------|-----------|
| 1     | 8.537          | 8196493 | 50.21    | 351215 | bb       | Unknown   |
| 2     | 11.118         | 8127534 | 49.79    | 278759 | bb       | Unknown   |

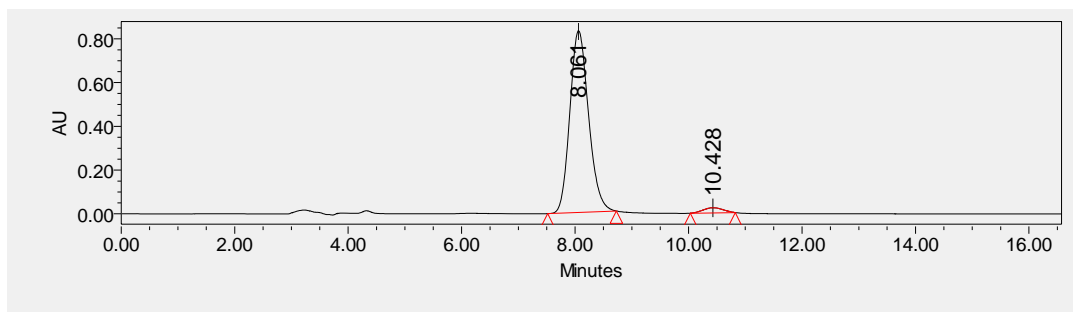

| Entry | Retention Time | Area     | Area (%) | Height | Int Type | Peak Type |
|-------|----------------|----------|----------|--------|----------|-----------|
| 1     | 8.061          | 18993096 | 97.09    | 830456 | bb       | Unknown   |
| 2     | 10.428         | 569783   | 2.91     | 23444  | bb       | Unknown   |

(S)-2'-amino-1-methyl-2-oxo-6'-phenylspiro[indoline-3,4'-pyran]-3',5'-dicarbonitrile (**Q4e**)

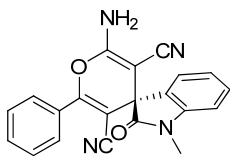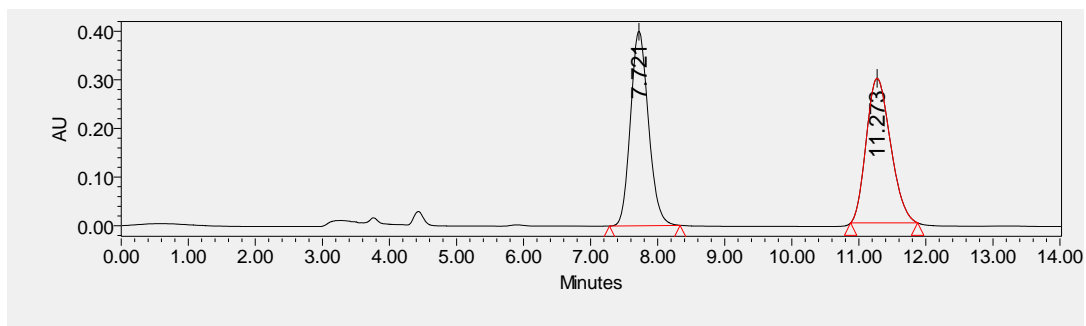

| Entry | Retention Time | Area    | Area (%) | Height | Int Type | Peak Type |
|-------|----------------|---------|----------|--------|----------|-----------|
| 1     | 7.721          | 7434942 | 49.87    | 399758 | bb       | Unknown   |
| 2     | 11.273         | 7474552 | 50.13    | 297092 | bb       | Unknown   |

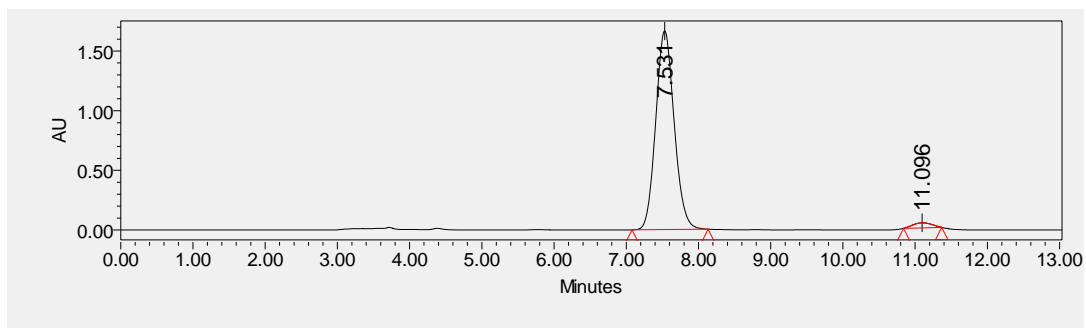

| Entry | Retention Time | Area     | Area (%) | Height  | Int Type | Peak Type |
|-------|----------------|----------|----------|---------|----------|-----------|
| 1     | 7.531          | 29511293 | 97.42    | 1664904 | bb       | Unknown   |
| 2     | 11.096         | 781505   | 2.58     | 42574   | bb       | Unknown   |

(S)-1-allyl-2'-amino-2-oxo-6'-phenylspiro[indoline-3,4'-pyran]-3,5'-dicarbonitrile (**Q4f**)

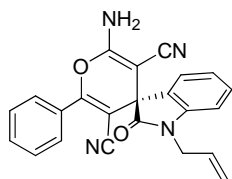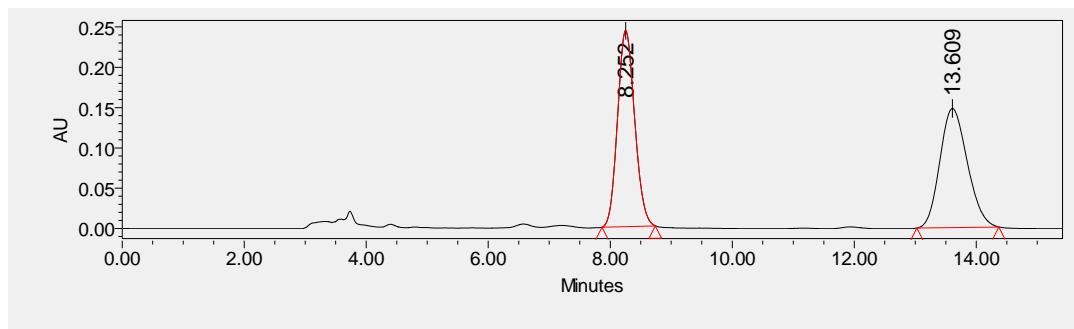

| Entry | Retention Time | Area    | Area (%) | Height | Int Type | Peak Type |
|-------|----------------|---------|----------|--------|----------|-----------|
| 1     | 8.252          | 4725852 | 50.64    | 243411 | bb       | Unknown   |
| 2     | 13.609         | 4606413 | 49.36    | 147655 | bb       | Unknown   |

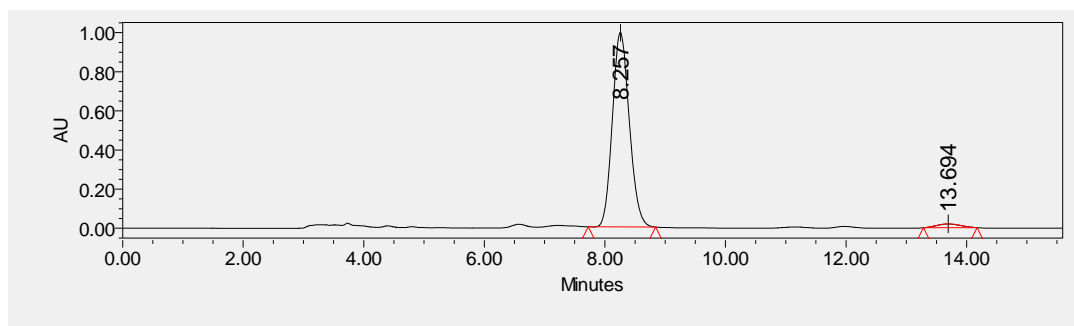

| Entry | Retention Time | Area     | Area (%) | Height | Int Type | Peak Type |
|-------|----------------|----------|----------|--------|----------|-----------|
| 1     | 8.257          | 19377892 | 97.30    | 994839 | bb       | Unknown   |
| 2     | 13.694         | 537211   | 2.70     | 19422  | bb       | Unknown   |

(S)-2'-amino-2-oxo-1,6'-diphenylspiro[indoline-3,4'-pyran]-3',5'-dicarbonitrile (**Q4g**)

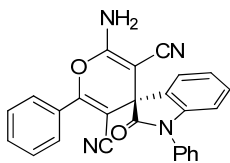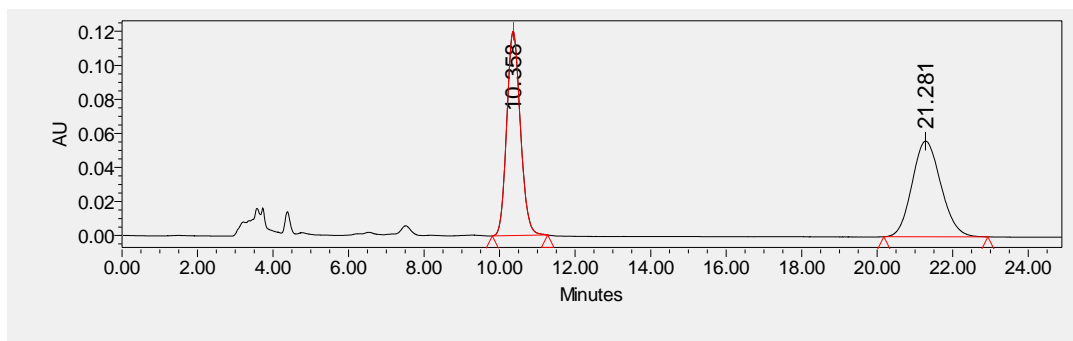

| Entry | Retention Time | Area    | Area (%) | Height | Int Type | Peak Type |
|-------|----------------|---------|----------|--------|----------|-----------|
| 1     | 10.358         | 2996667 | 50.09    | 120108 | bb       | Unknown   |
| 2     | 21.281         | 2986100 | 49.91    | 56230  | bb       | Unknown   |

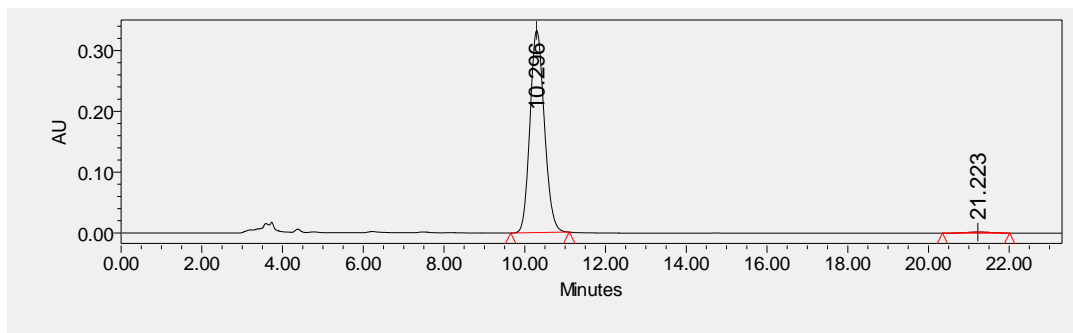

| Entry | Retention Time | Area    | Area (%) | Height | Int Type | Peak Type |
|-------|----------------|---------|----------|--------|----------|-----------|
| 1     | 10.296         | 8214774 | 99.01    | 332751 | bb       | Unknown   |
| 2     | 21.223         | 81858   | 0.99     | 1722   | bb       | Unknown   |

(S)-2'-amino-1-benzyl-2-oxo-6'-phenylspiro[indoline-3,4'-pyran]-3',5'-dicarbonitrile (Q4h)

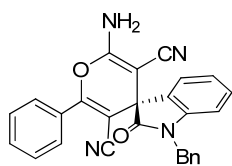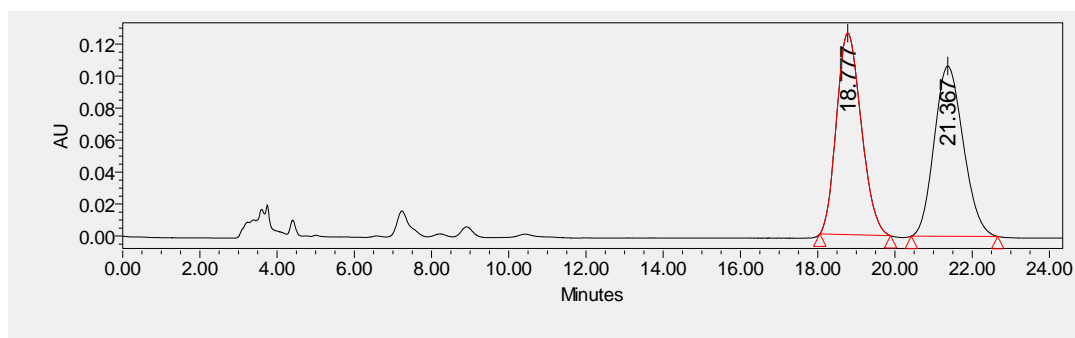

| Entry | Retention Time | Area    | Area (%) | Height | Int Type | Peak Type |
|-------|----------------|---------|----------|--------|----------|-----------|
| 1     | 18.777         | 5599946 | 50.23    | 125983 | bb       | Unknown   |
| 2     | 21.367         | 5549693 | 49.77    | 106373 | bb       | Unknown   |

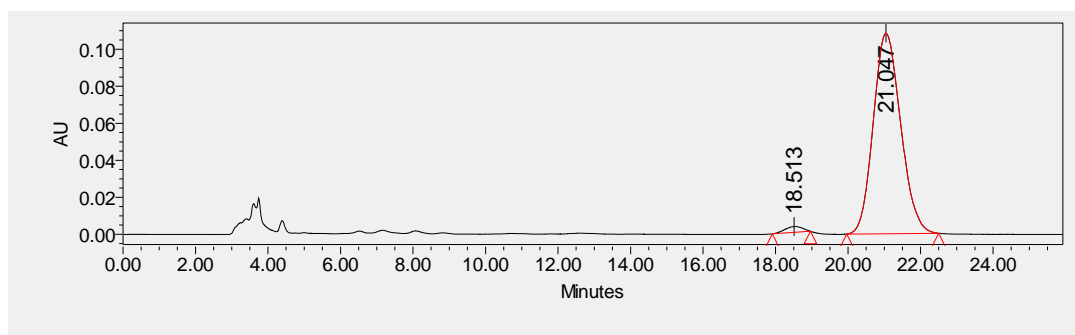

| Entry | Retention Time | Area    | Area (%) | Height | Int Type | Peak Type |
|-------|----------------|---------|----------|--------|----------|-----------|
| 1     | 18.513         | 106921  | 1.85     | 3170   | bb       | Unknown   |
| 2     | 21.047         | 5678297 | 98.15    | 108365 | bb       | Unknown   |



(S)-1-acetyl-2'-amino-2-oxo-6'-phenylspiro[indoline-3,4'-pyran]-3',5'-dicarbonitrile (Q4i)

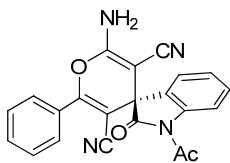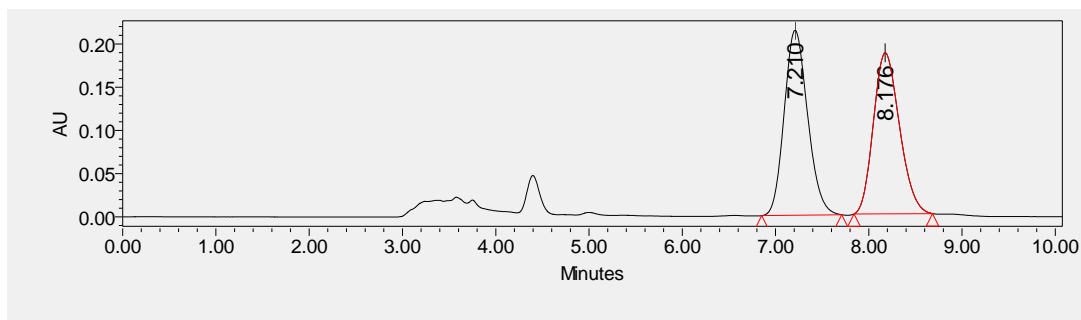

| Entry | Retention Time | Area    | Area (%) | Height | Int Type | Peak Type |
|-------|----------------|---------|----------|--------|----------|-----------|
| 1     | 7.210          | 3734426 | 50.82    | 213985 | bb       | Unknown   |
| 2     | 8.176          | 3613869 | 49.18    | 186227 | bb       | Unknown   |

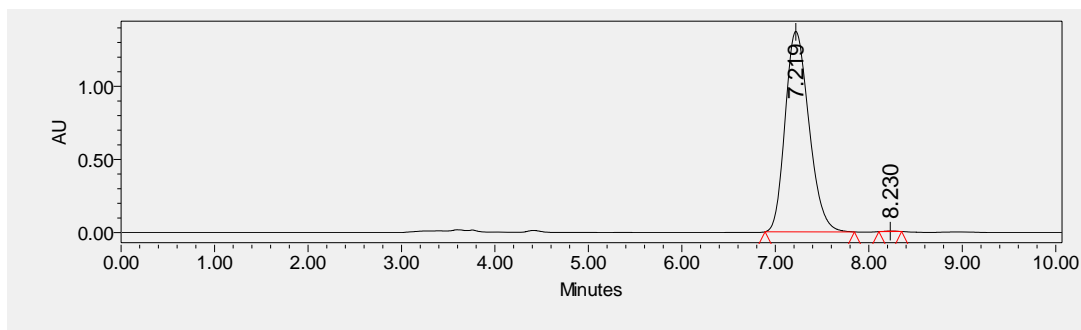

| Entry | Retention Time | Area     | Area (%) | Height  | Int Type | Peak Type |
|-------|----------------|----------|----------|---------|----------|-----------|
| 1     | 7.219          | 24282977 | 99.89    | 1370921 | bb       | Unknown   |
| 2     | 8.230          | 27412    | 0.11     | 2991    | bb       | Unknown   |

(S)-1-allyl-2'-amino-7-fluoro-2-oxo-6'-phenylspiro[indoline-3,4'-pyran]-3',5'-dicarbonitrile (**Q4j**)

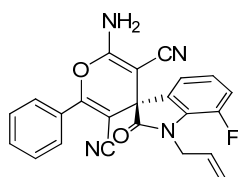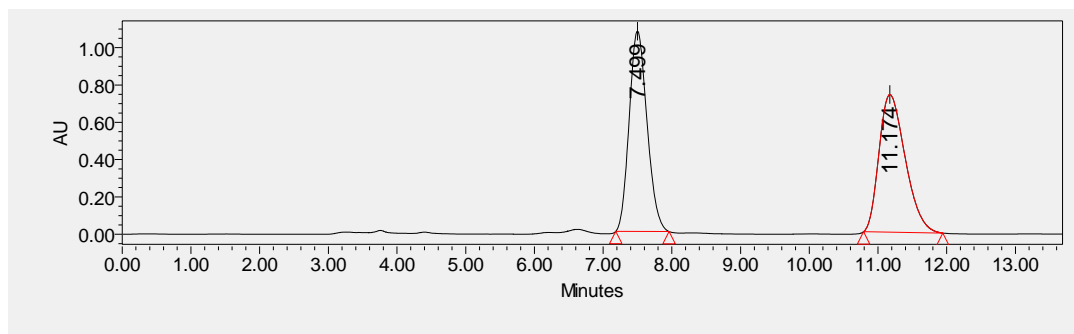

| Entry | Retention Time | Area     | Area (%) | Height  | Int Type | Peak Type |
|-------|----------------|----------|----------|---------|----------|-----------|
| 1     | 7.499          | 19380517 | 49.84    | 1074327 | bb       | Unknown   |
| 2     | 11.174         | 19506439 | 50.16    | 737355  | bb       | Unknown   |

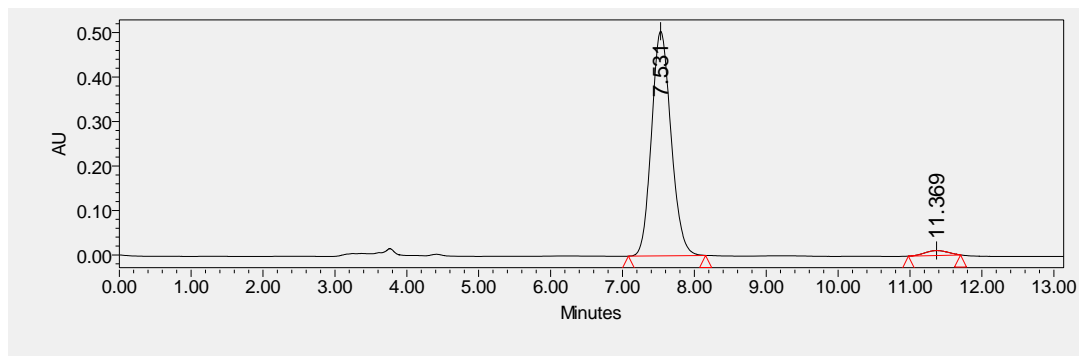

| Entry | Retention Time | Area    | Area (%) | Height | Int Type | Peak Type |
|-------|----------------|---------|----------|--------|----------|-----------|
| 1     | 7.531          | 9527582 | 97.48    | 505431 | bb       | Unknown   |
| 2     | 11.369         | 246001  | 2.52     | 11086  | bb       | Unknown   |

(S)-1-allyl-2'-amino-5-chloro-2-oxo-6'-phenylspiro[indoline-3,4'-pyran]-3',5'-dicarbonitrile (**Q4k**)

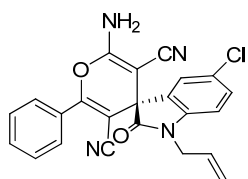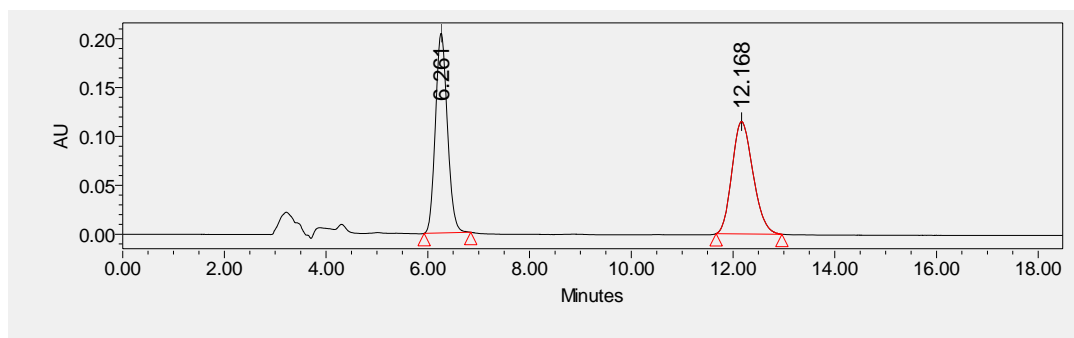

| Entry | Retention Time | Area    | Area (%) | Height | Int Type | Peak Type |
|-------|----------------|---------|----------|--------|----------|-----------|
| 1     | 6.261          | 3334836 | 50.38    | 204339 | bb       | Unknown   |
| 2     | 12.168         | 3284913 | 49.62    | 114773 | bb       | Unknown   |

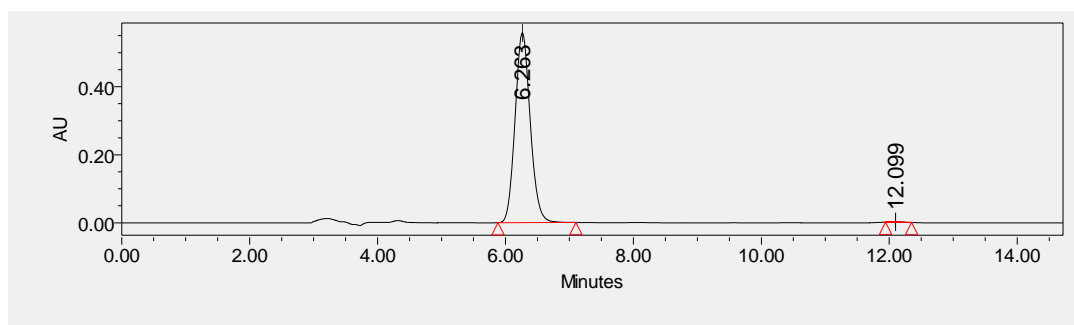

| Entry | Retention Time | Area    | Area (%) | Height | Int Type | Peak Type |
|-------|----------------|---------|----------|--------|----------|-----------|
| 1     | 6.263          | 9195063 | 99.83    | 558305 | bb       | Unknown   |
| 2     | 12.099         | 15913   | 0.17     | 1092   | bb       | Unknown   |

(S)-1-allyl-2'-amino-7-chloro-2-oxo-6'-phenylspiro[indoline-3,4'-pyran]-3',5'-dicarbonitrile (**Q41**)

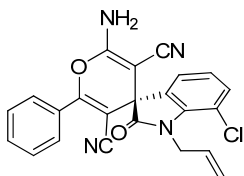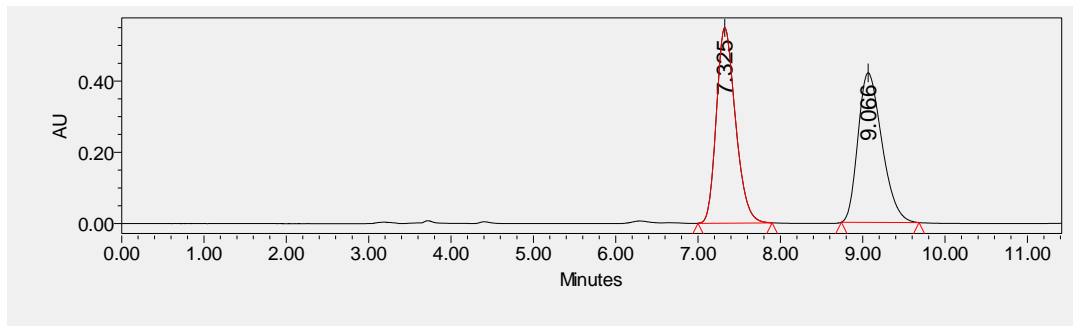

| Entry | Retention Time | Area    | Area (%) | Height | Int Type | Peak Type |
|-------|----------------|---------|----------|--------|----------|-----------|
| 1     | 7.325          | 8816025 | 50.99    | 548589 | bb       | Unknown   |
| 2     | 9.066          | 8472885 | 49.01    | 419684 | bb       | Unknown   |

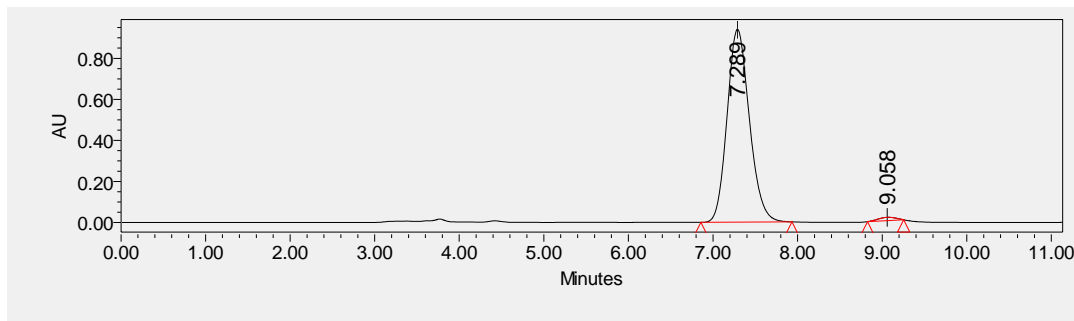

| Entry | Retention Time | Area     | Area (%) | Height | Int Type | Peak Type |
|-------|----------------|----------|----------|--------|----------|-----------|
| 1     | 7.289          | 17191849 | 98.64    | 939937 | bb       | Unknown   |
| 2     | 9.058          | 236284   | 1.36     | 16243  | bb       | Unknown   |

(*S*)-1-allyl-2'-amino-5-chloro-7-methyl-2-oxo-6'-phenylspiro[indoline-3,4'-pyran]-3',5'-dicarbonitrile (**Q4m**)

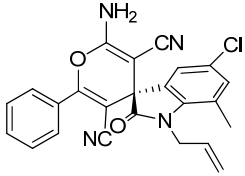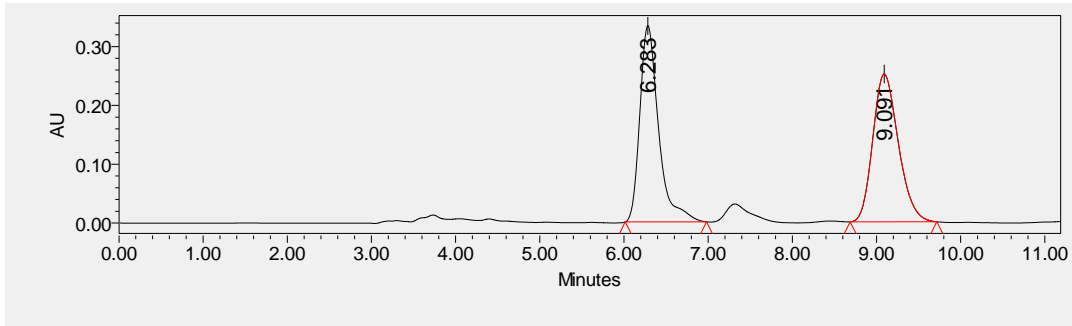

| Entry | Retention Time | Area    | Area (%) | Height | Int Type | Peak Type |
|-------|----------------|---------|----------|--------|----------|-----------|
| 1     | 6.283          | 5167061 | 49.43    | 333746 | bb       | Unknown   |
| 2     | 9.091          | 5286817 | 50.57    | 251280 | bb       | Unknown   |

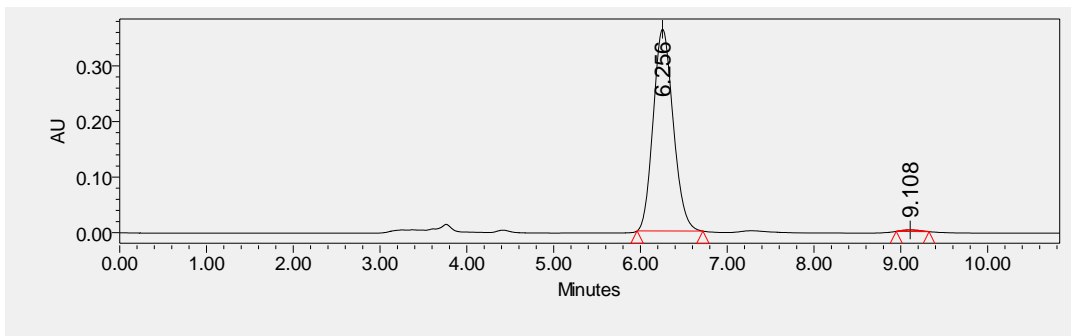

| Entry | Retention Time | Area    | Area (%) | Height | Int Type | Peak Type |
|-------|----------------|---------|----------|--------|----------|-----------|
| 1     | 6.256          | 5808701 | 99.35    | 362796 | bb       | Unknown   |
| 2     | 9.108          | 38213   | 0.65     | 2799   | bb       | Unknown   |

(S)-1-allyl-2'-amino-5-bromo-2-oxo-6'-phenylspiro[indoline-3,4'-pyran]-3',5'-dicarbonitrile (**Q4n**)

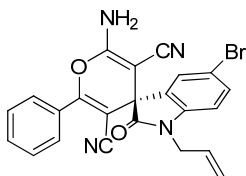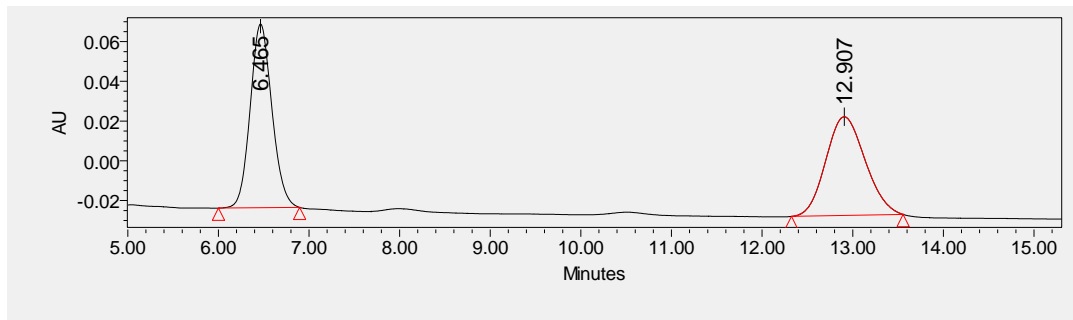

| Entry | Retention Time | Area    | Area (%) | Height | Int Type | Peak Type |
|-------|----------------|---------|----------|--------|----------|-----------|
| 1     | 6.465          | 1540523 | 50.71    | 92449  | bb       | Unknown   |
| 2     | 12.907         | 1497145 | 49.29    | 49673  | bb       | Unknown   |

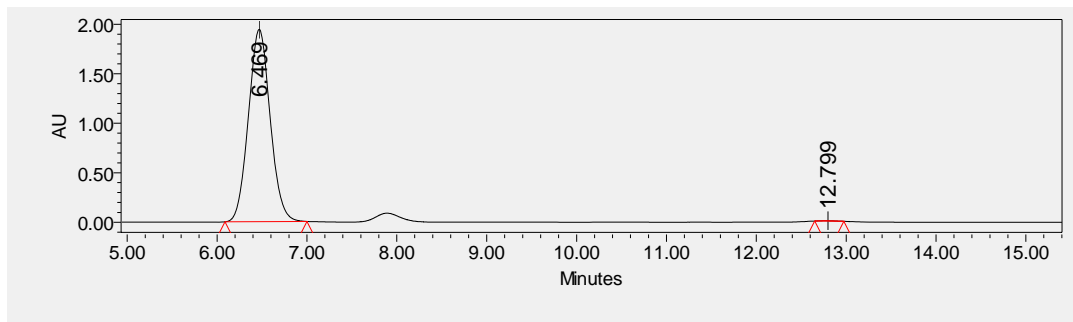

| Entry | Retention Time | Area     | Area (%) | Height  | Int Type | Peak Type |
|-------|----------------|----------|----------|---------|----------|-----------|
| 1     | 6.469          | 32660271 | 99.85    | 1942448 | bb       | Unknown   |
| 2     | 12.799         | 48008    | 0.15     | 3874    | bb       | Unknown   |

(S)-1-allyl-2'-amino-5-methyl-2-oxo-6'-phenylspiro[indoline-3,4'-pyran]-3',5'-dicarbonitrile (**Q4o**)

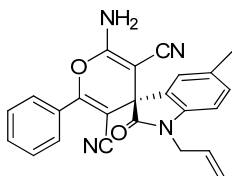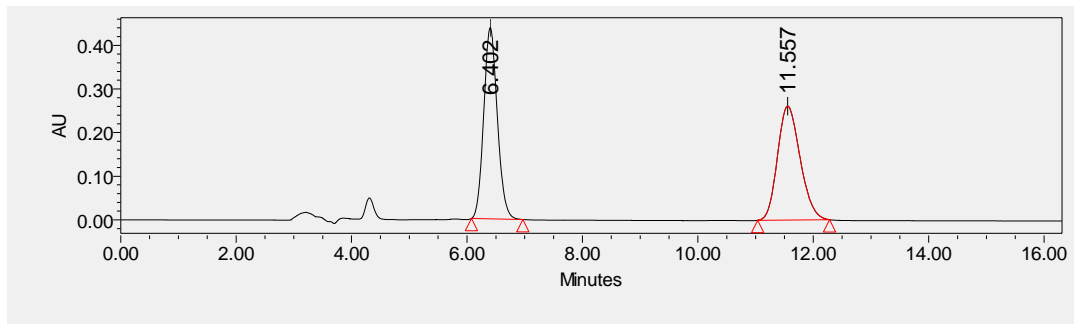

| Entry | Retention Time | Area    | Area (%) | Height | Int Type | Peak Type |
|-------|----------------|---------|----------|--------|----------|-----------|
| 1     | 6.402          | 7168957 | 50.23    | 438382 | bb       | Unknown   |
| 2     | 11.557         | 7103001 | 49.77    | 261188 | bb       | Unknown   |

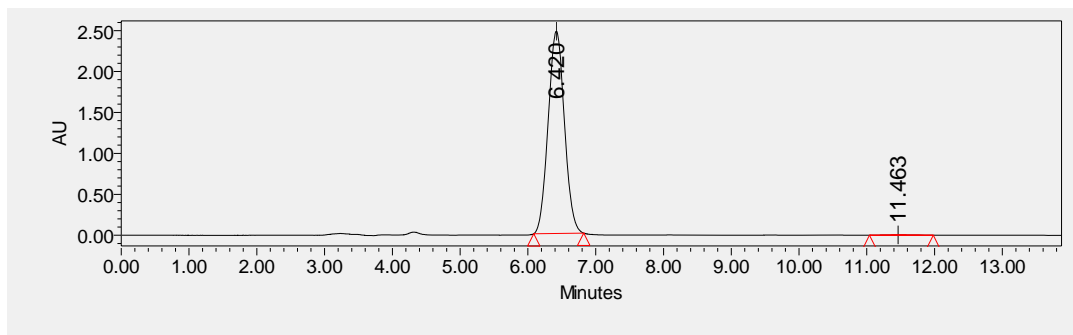

| Entry | Retention Time | Area     | Area (%) | Height  | Int Type | Peak Type |
|-------|----------------|----------|----------|---------|----------|-----------|
| 1     | 6.420          | 41075254 | 99.70    | 2470262 | bb       | Unknown   |
| 2     | 11.463         | 121624   | 0.30     | 4974    | bb       | Unknown   |

(S)-1-allyl-2'-amino-5-methoxy-2-oxo-6'-phenylspiro[indoline-3,4'-pyran]-3',5'-dicyanitrile  
(Q4p)

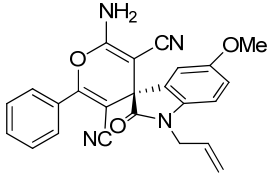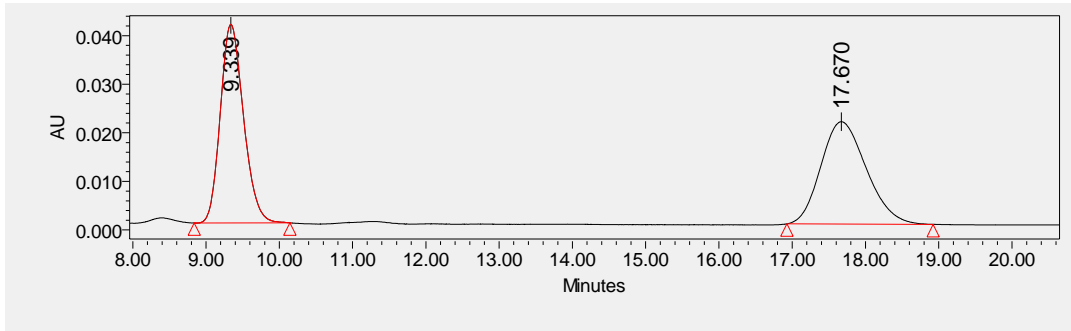

| Entry | Retention Time | Area   | Area (%) | Height | Int Type | Peak Type |
|-------|----------------|--------|----------|--------|----------|-----------|
| 1     | 9.339          | 898735 | 49.73    | 40910  | bb       | Unknown   |
| 2     | 17.670         | 908321 | 50.27    | 21070  | bb       | Unknown   |

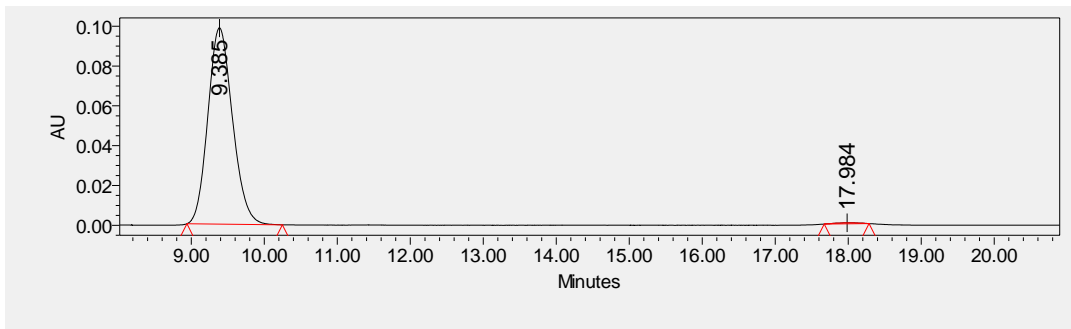

| Entry | Retention Time | Area    | Area (%) | Height | Int Type | Peak Type |
|-------|----------------|---------|----------|--------|----------|-----------|
| 1     | 9.385          | 2300821 | 99.47    | 98537  | bb       | Unknown   |
| 2     | 17.984         | 12173   | 0.53     | 533    | bb       | Unknown   |



(S)-2'-amino-6'-(3-chlorophenyl)-2-oxospiro[indoline-3,4'-pyran]-3',5'-dicarbonitrile (Q4q)

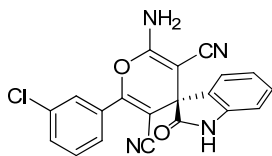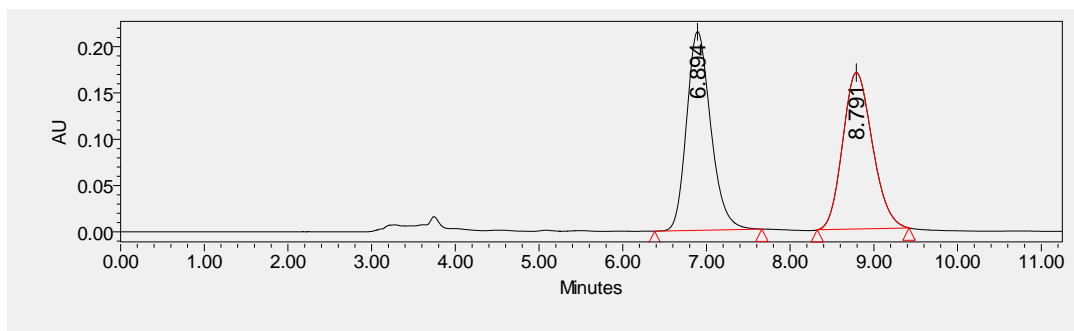

| Entry | Retention Time | Area    | Area (%) | Height | Int Type | Peak Type |
|-------|----------------|---------|----------|--------|----------|-----------|
| 1     | 6.894          | 4298030 | 50.78    | 214895 | bb       | Unknown   |
| 2     | 8.791          | 4165319 | 49.22    | 169093 | bb       | Unknown   |

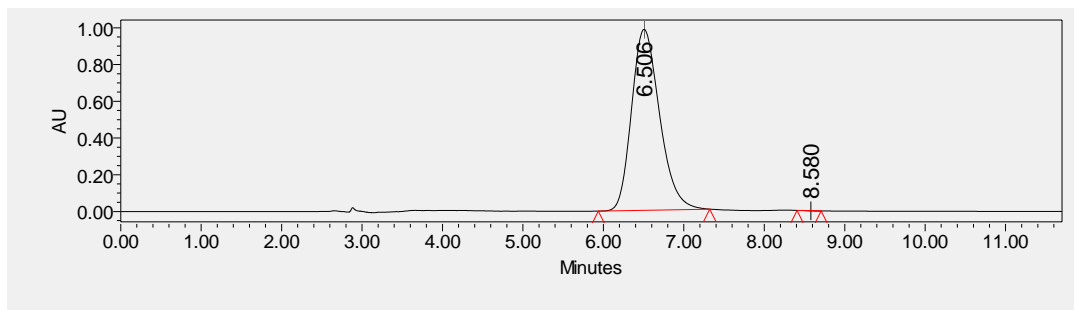

| Entry | Retention Time | Area     | Area (%) | Height | Int Type | Peak Type |
|-------|----------------|----------|----------|--------|----------|-----------|
| 1     | 6.506          | 23844261 | 99.99    | 985742 | bb       | Unknown   |
| 2     | 8.580          | 3126     | 0.01     | -280   | bb       | Unknown   |

(S)-2'-amino-6'-(4-chlorophenyl)-2-oxospiro[indoline-3,4'-pyran]-3',5'-dicarbonitrile (**Q4r**)

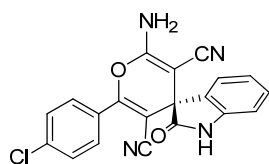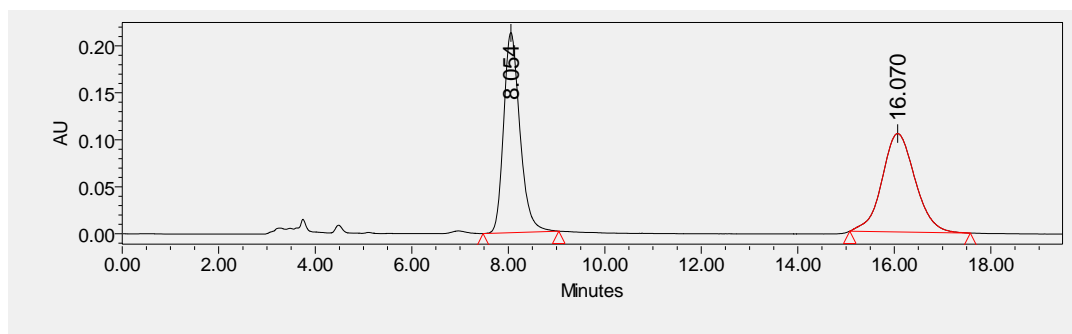

| Entry | Retention Time | Area    | Area (%) | Height | Int Type | Peak Type |
|-------|----------------|---------|----------|--------|----------|-----------|
| 1     | 8.054          | 4972769 | 50.01    | 212970 | bb       | Unknown   |
| 2     | 16.070         | 4971552 | 49.99    | 104655 | bb       | Unknown   |

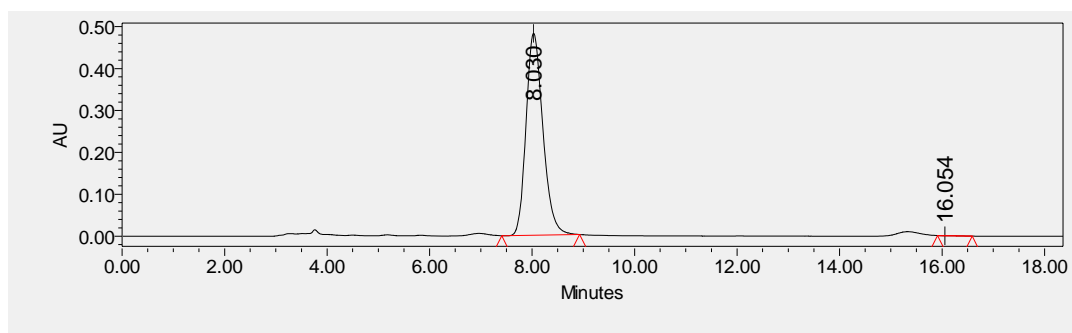

| Entry | Retention Time | Area     | Area (%) | Height | Int Type | Peak Type |
|-------|----------------|----------|----------|--------|----------|-----------|
| 1     | 8.030          | 10995890 | 99.97    | 481630 | bb       | Unknown   |
| 2     | 16.054         | 3585     | 0.03     | -158   | bb       | Unknown   |

(S)-2'-amino-2-oxo-6'-m-tolylspiro[indoline-3,4'-pyran]-3',5'-dicarbonitrile (**Q4s**)

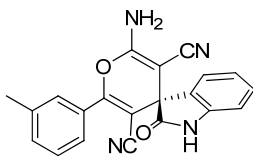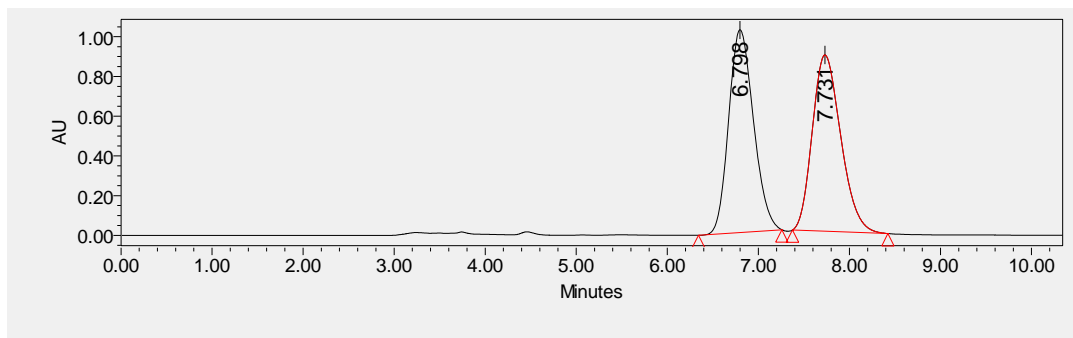

| Entry | Retention Time | Area     | Area (%) | Height  | Int Type | Peak Type |
|-------|----------------|----------|----------|---------|----------|-----------|
| 1     | 6.798          | 19317190 | 50.06    | 1020839 | bb       | Unknown   |
| 2     | 7.731          | 19272017 | 49.94    | 887226  | bb       | Unknown   |

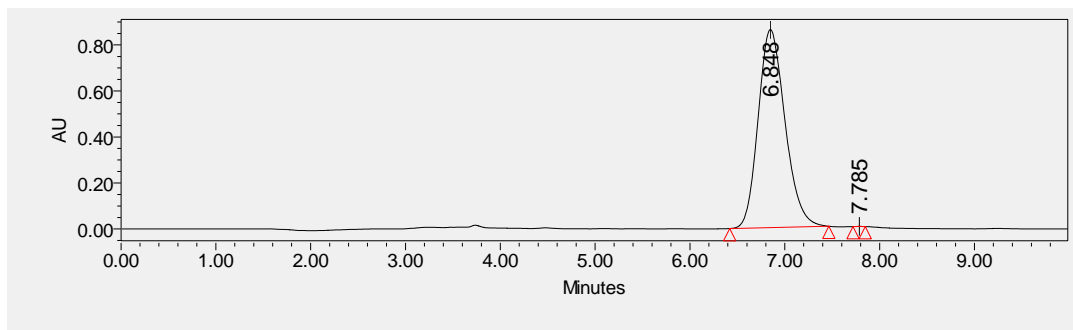

| Entry | Retention Time | Area     | Area (%) | Height | Int Type | Peak Type |
|-------|----------------|----------|----------|--------|----------|-----------|
| 1     | 6.848          | 16944656 | 99.98    | 860842 | bb       | Unknown   |
| 2     | 7.785          | 2666     | 0.02     | 533    | bb       | Unknown   |

(S)-2'-amino-2-oxo-6'-p-tolylspiro[indoline-3,4'-pyran]-3',5'-dicarbonitrile (Q4t)

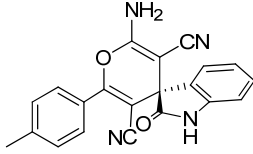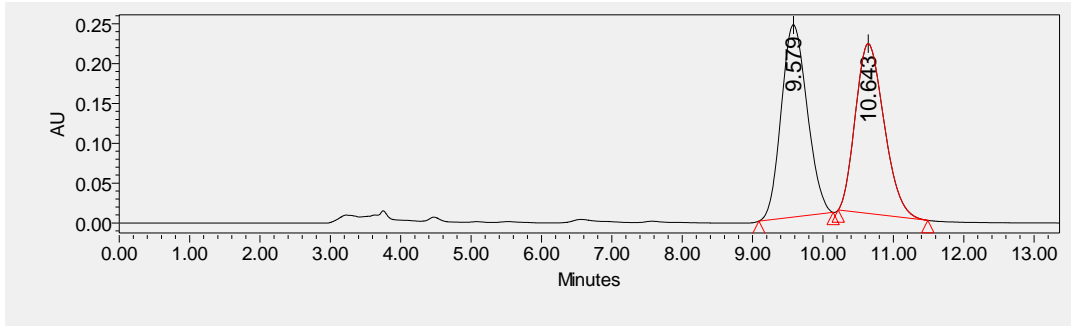

| Entry | Retention Time | Area    | Area (%) | Height | Int Type | Peak Type |
|-------|----------------|---------|----------|--------|----------|-----------|
| 1     | 9.579          | 6166421 | 50.56    | 241321 | bb       | Unknown   |
| 2     | 10.643         | 6029328 | 49.44    | 213006 | bb       | Unknown   |

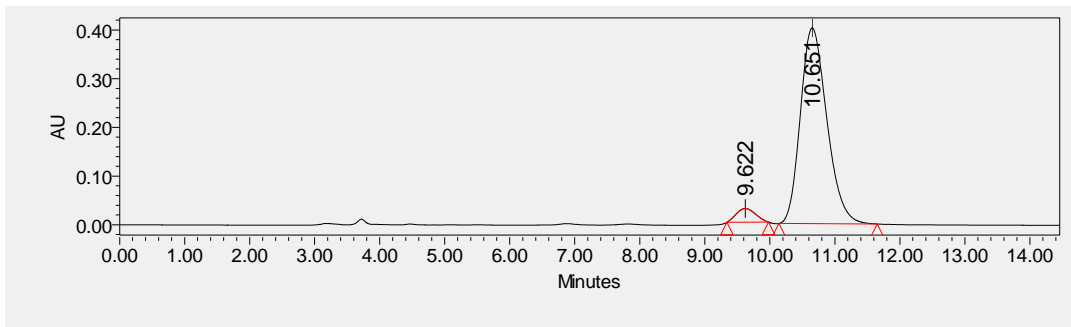

| Entry | Retention Time | Area     | Area (%) | Height | Int Type | Peak Type |
|-------|----------------|----------|----------|--------|----------|-----------|
| 1     | 9.622          | 579309   | 4.85     | 28052  | bb       | Unknown   |
| 2     | 10.651         | 11356003 | 95.15    | 402227 | bb       | Unknown   |

### 3. NMR spectra of products

(*S*)-2'-amino-2-oxo-6'-phenylspiro[indoline-3,4'-pyran]-3',5'-dicyanitrile (**Q4a**):

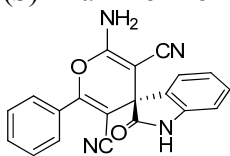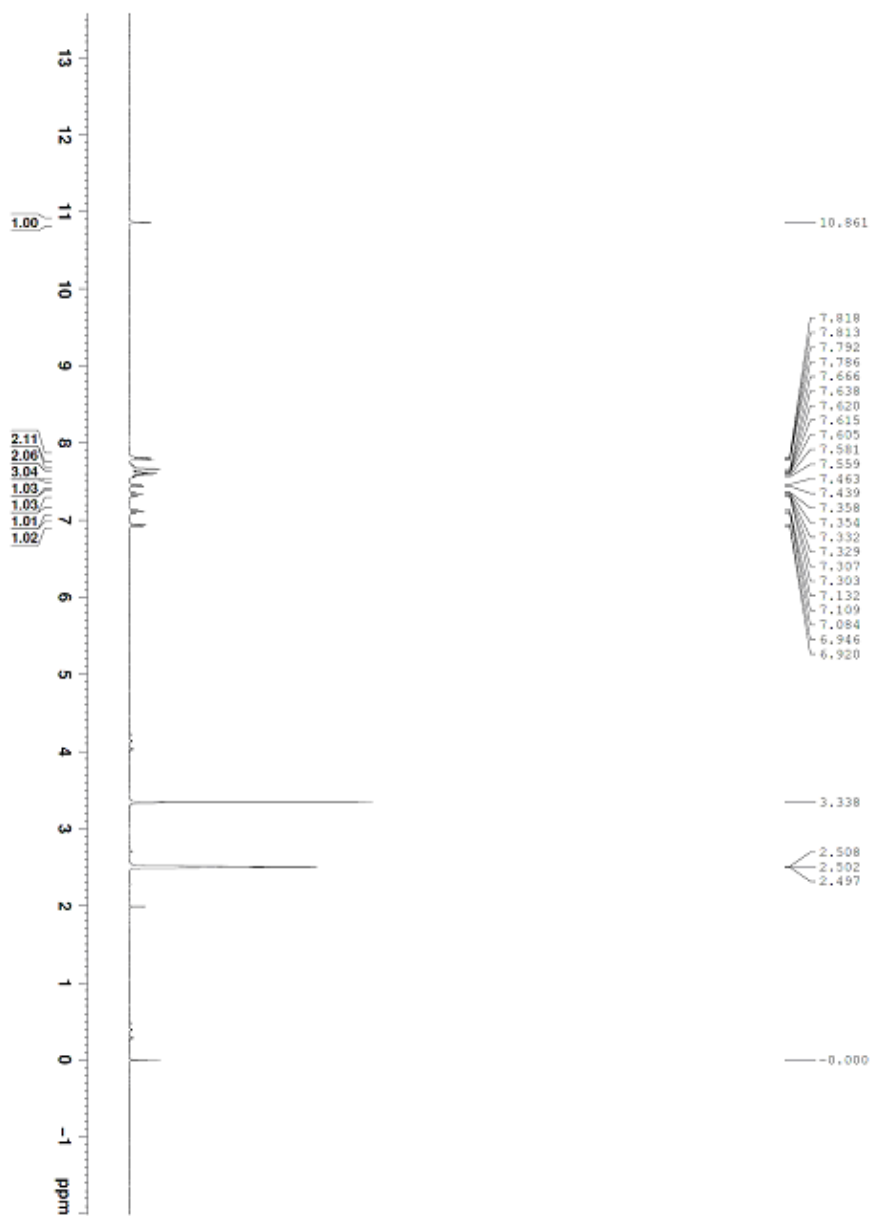

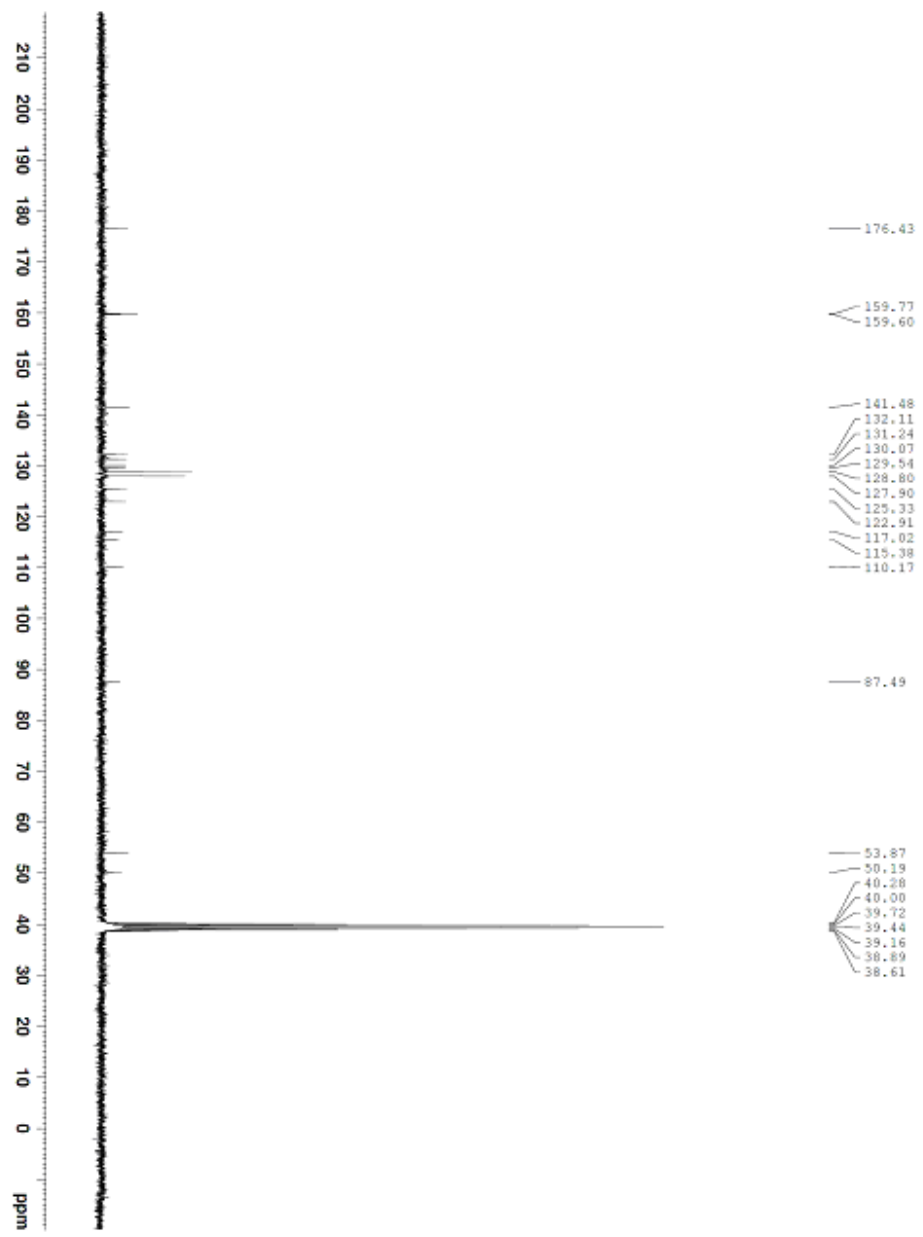

(S)-2'-amino-5-fluoro-2-oxo-6'-phenylspiro[indoline-3,4'-pyran]-3',5'-dicarbonitrile (**Q4b**)

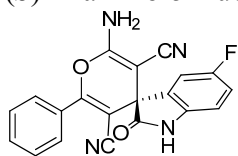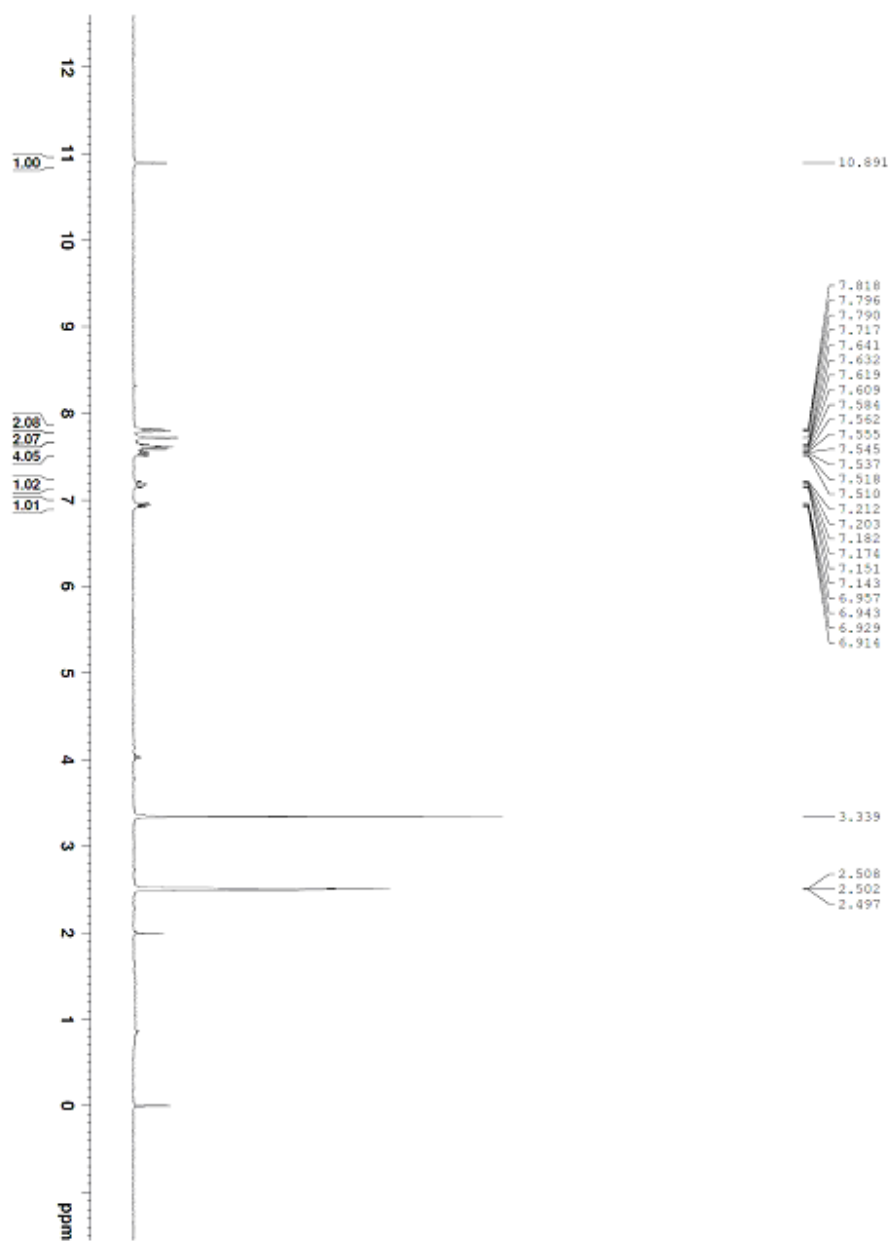

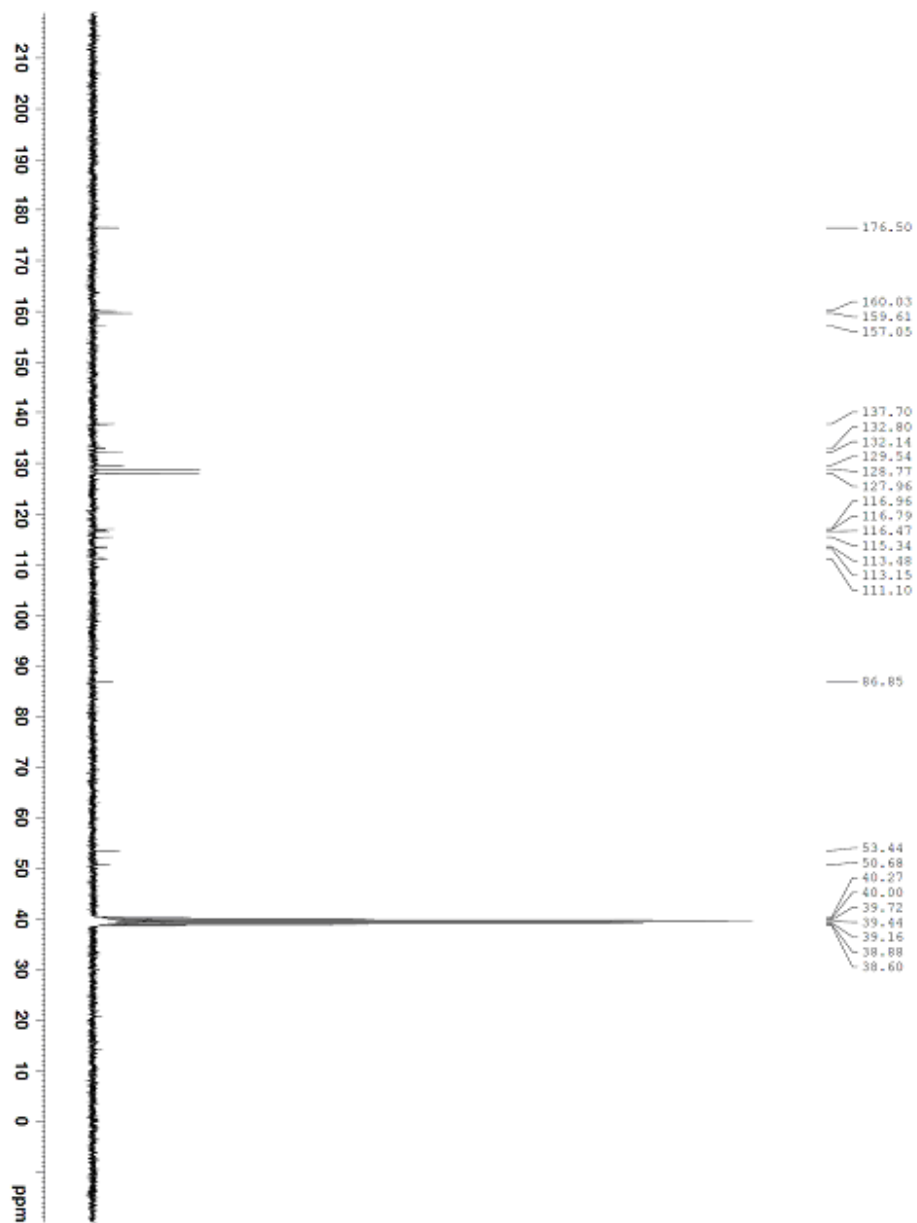



(S)-2'-amino-7-fluoro-2-oxo-6'-phenylspiro[indoline-3,4'-pyran]-3',5'-dicarbonitrile (**Q4c**)

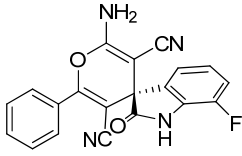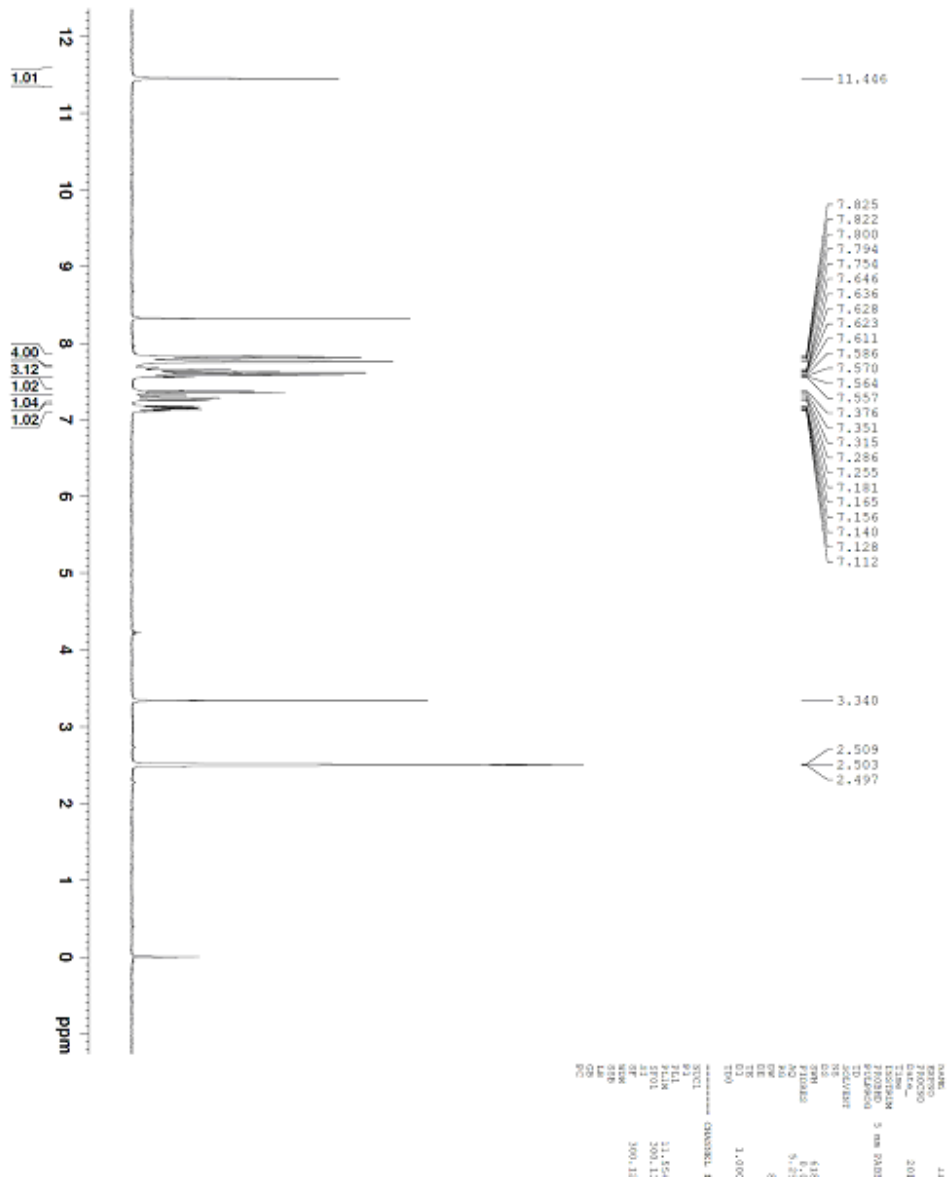

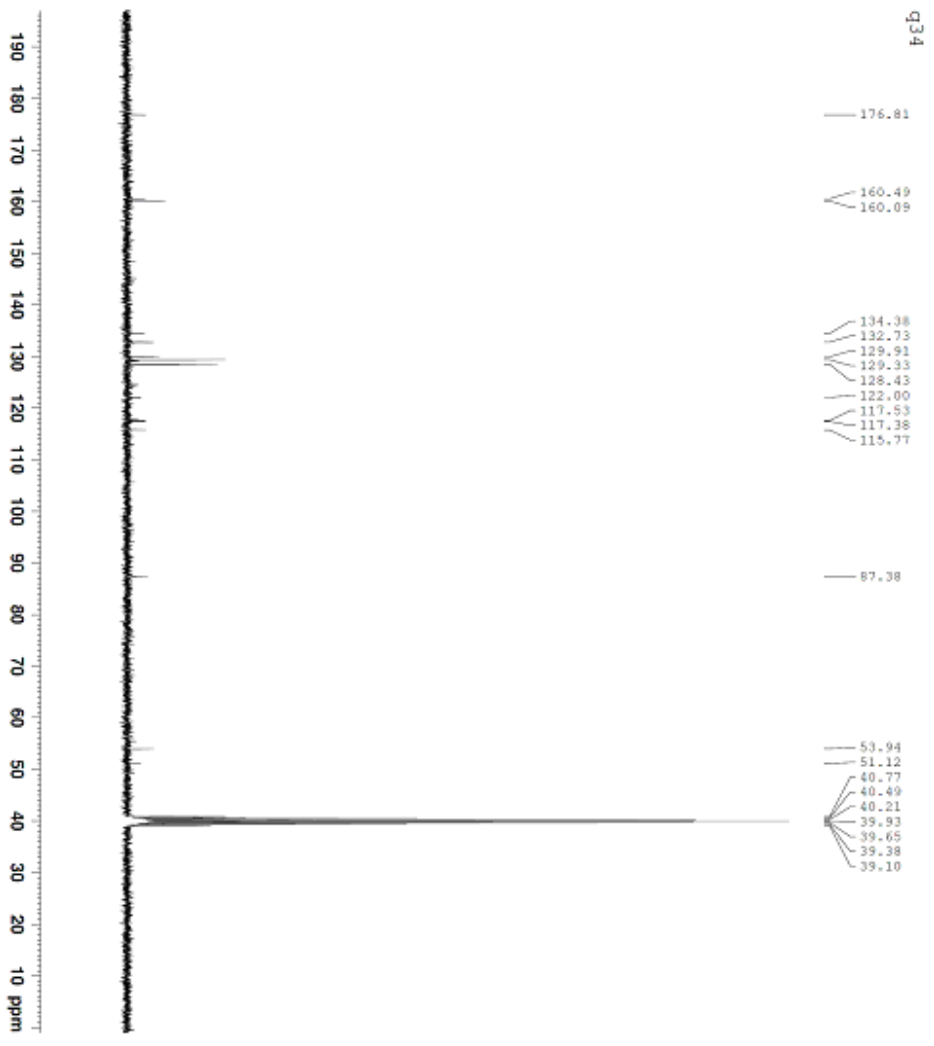

```

NAME          29900
PROCNO       1
DATE_        20120520
INSTRUM      spect
PROBHD       5 mm SSBBO EB-
PULPROG      zgpg30
TD           65536
SOLVENT      DMSO
D1           2.00
DELTA        4
NUC1          13
NUC2          13
F2           125.76146 MHz
AQ           1.8172818 sec
RG          277
AQ           6.50 umsec
DE           1.00
TE           300.2 K
FID          0.31001000 sec
SI          1
===== CHANNEL f1 =====
NUC1         13C
P1           1.50 umsec
PL1          0.00 dB
PR1          20.0000000 W
SFO1         125.76146 MHz
===== CHANNEL f2 =====
NAME         VAL111
PULSEPRG     zgpg30
NUC1         13C
P1           09.00 umsec
PL1          1.00 dB
PR1          17.00 dB
SFO1         125.76146 MHz
===== CHANNEL f3 =====
NAME         VAL112
PULSEPRG     zgpg30
NUC1         13C
P1           02.2000000 sec
PL1          180.0000000 dB
SFO1         125.4077460 MHz
===== CHANNEL f4 =====
NAME         VAL113
PULSEPRG     zgpg30
NUC1         13C
P1           1.00 sec
PL1          1.00 dB
SFO1         1.40

```

(S)-2'-amino-5-methoxy-2-oxo-6'-phenylspiro[indoline-3,4'-pyran]-3',5'-dicyanitrile (**Q4d**)

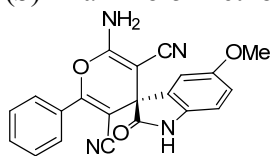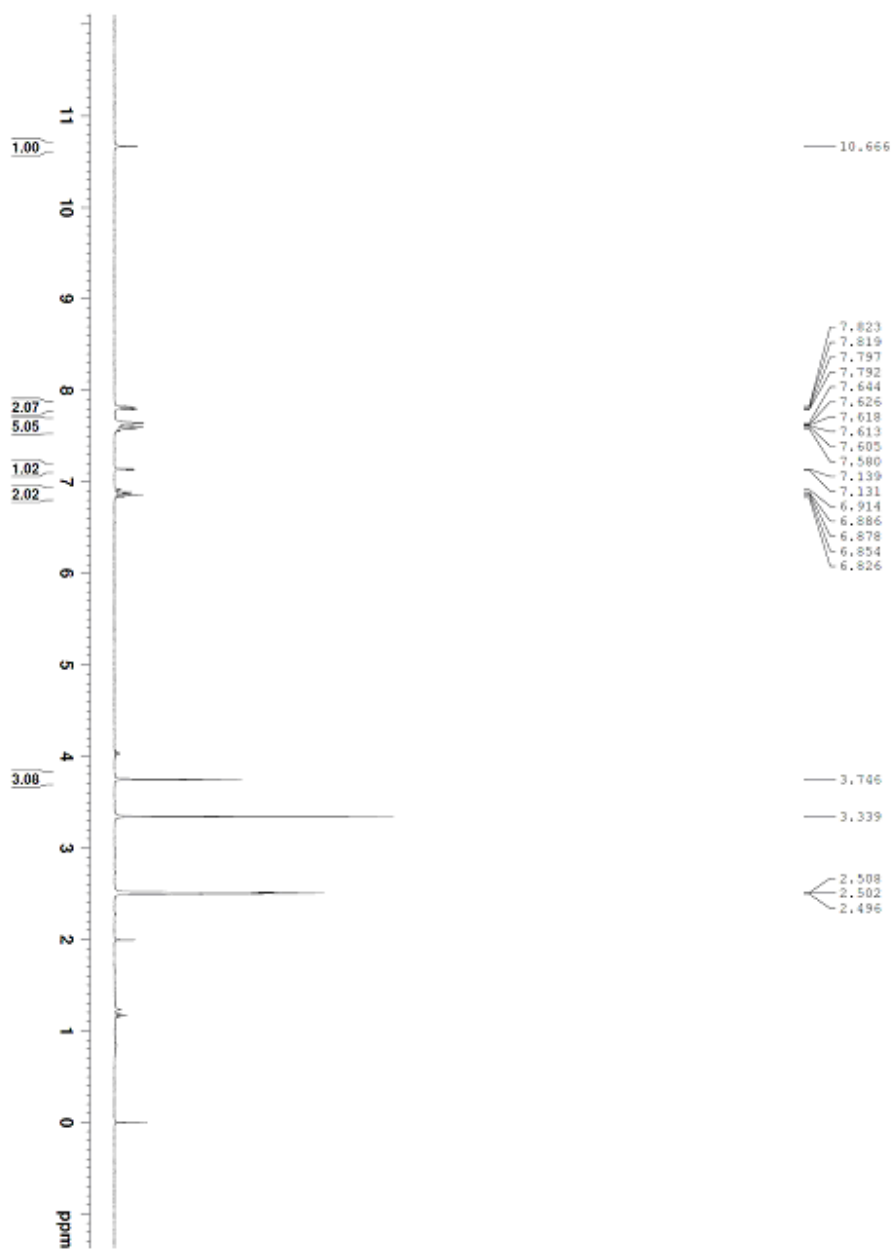

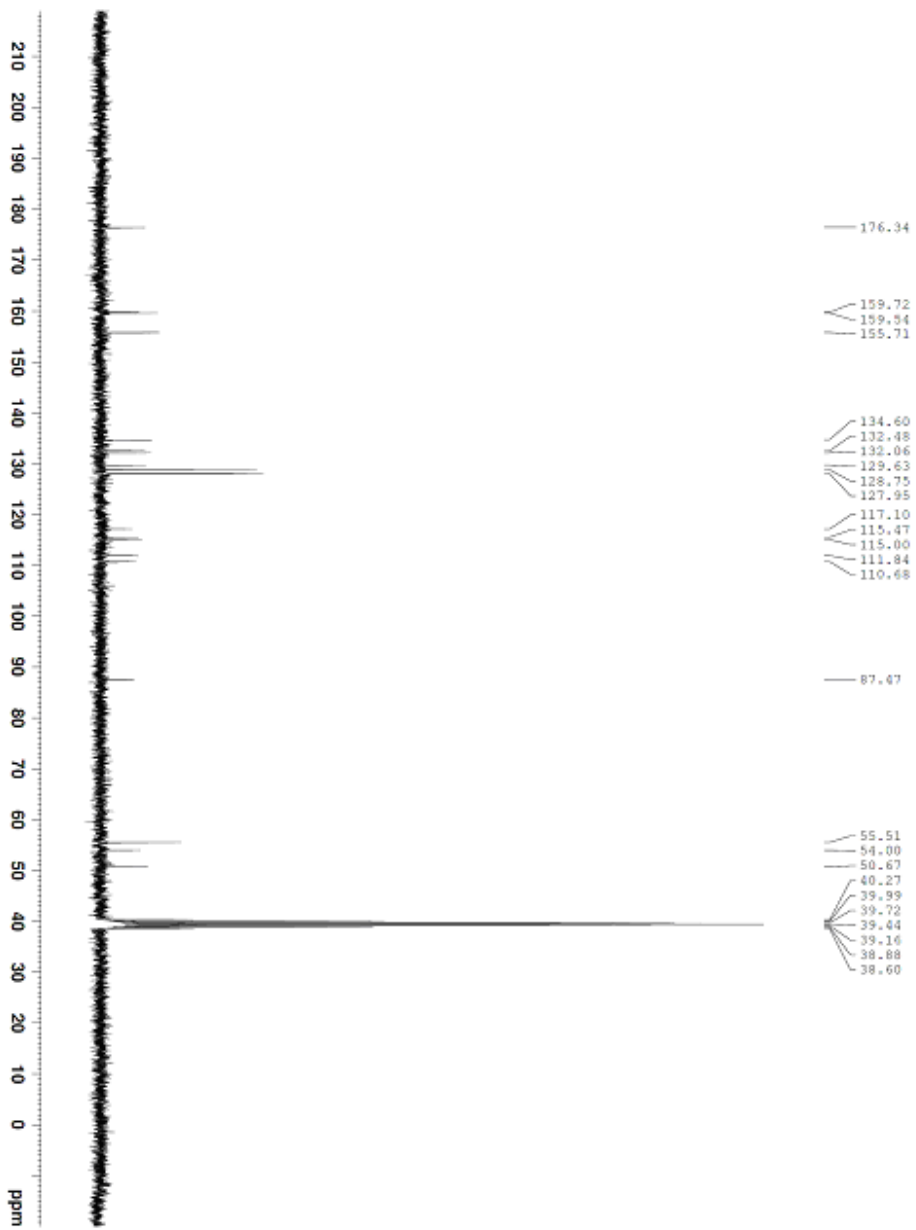

(S)-2'-amino-1-methyl-2-oxo-6'-phenylspiro[indoline-3,4'-pyran]-3',5'-dicarbonitrile (**Q4e**)

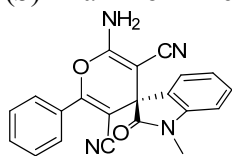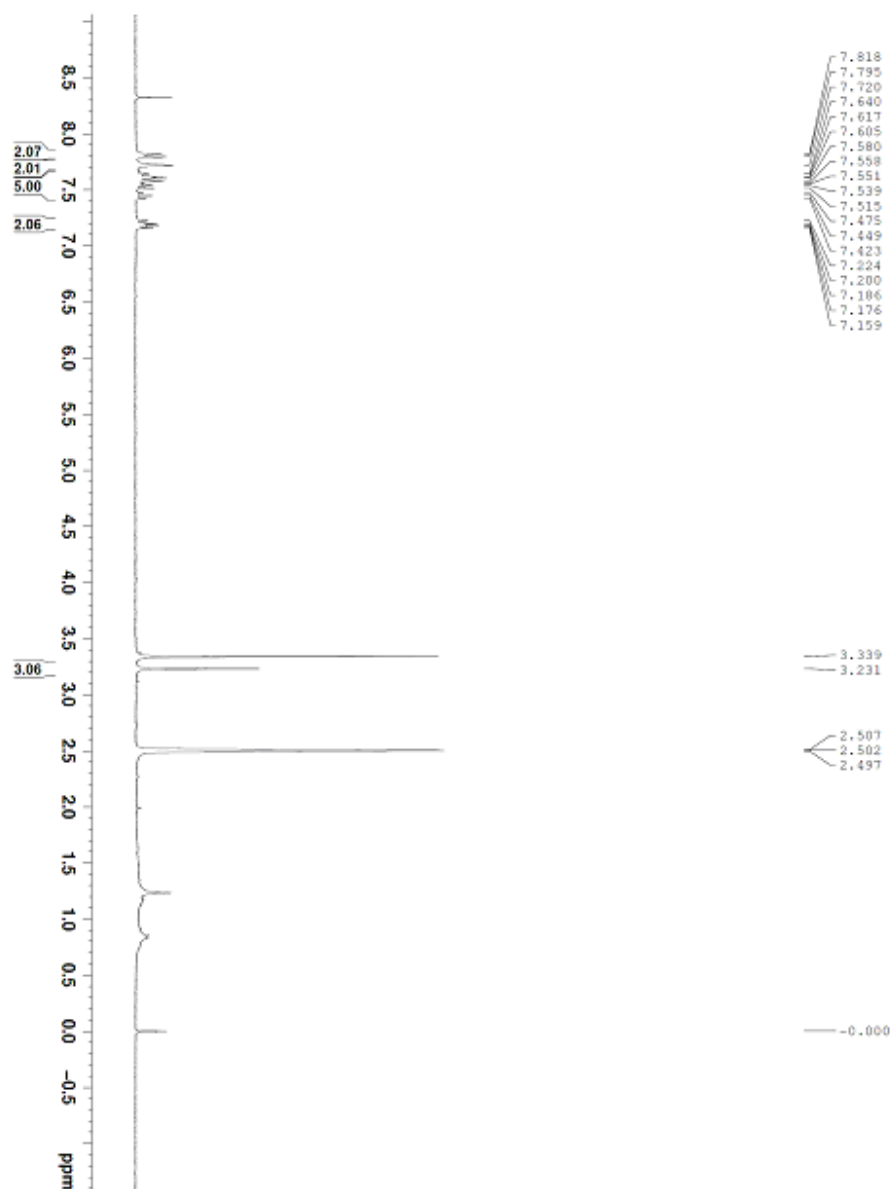

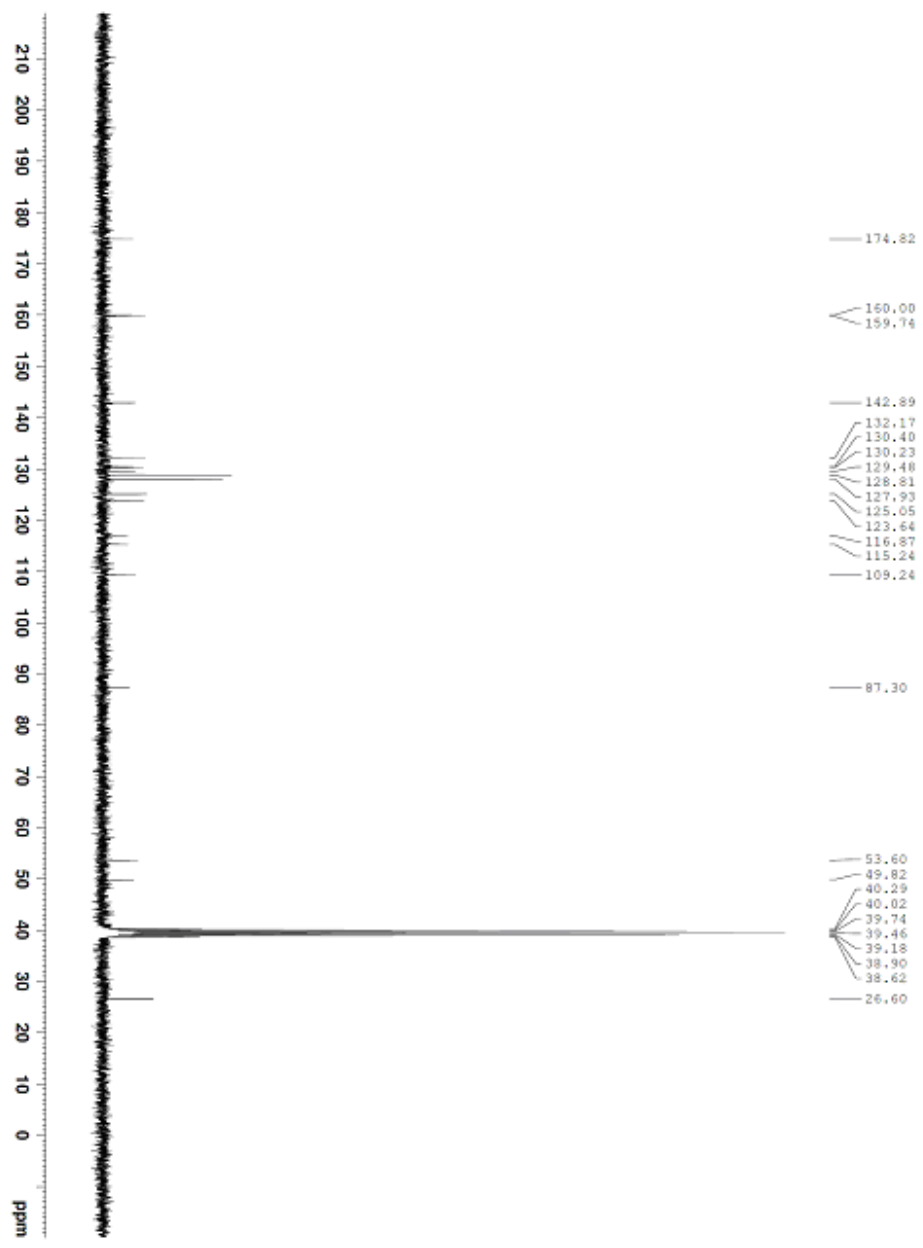

(S)-1-allyl-2'-amino-2-oxo-6'-phenylspiro[indoline-3,4'-pyran]-3,5'-dicarbonitrile (**Q4f**)

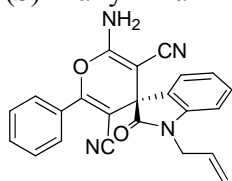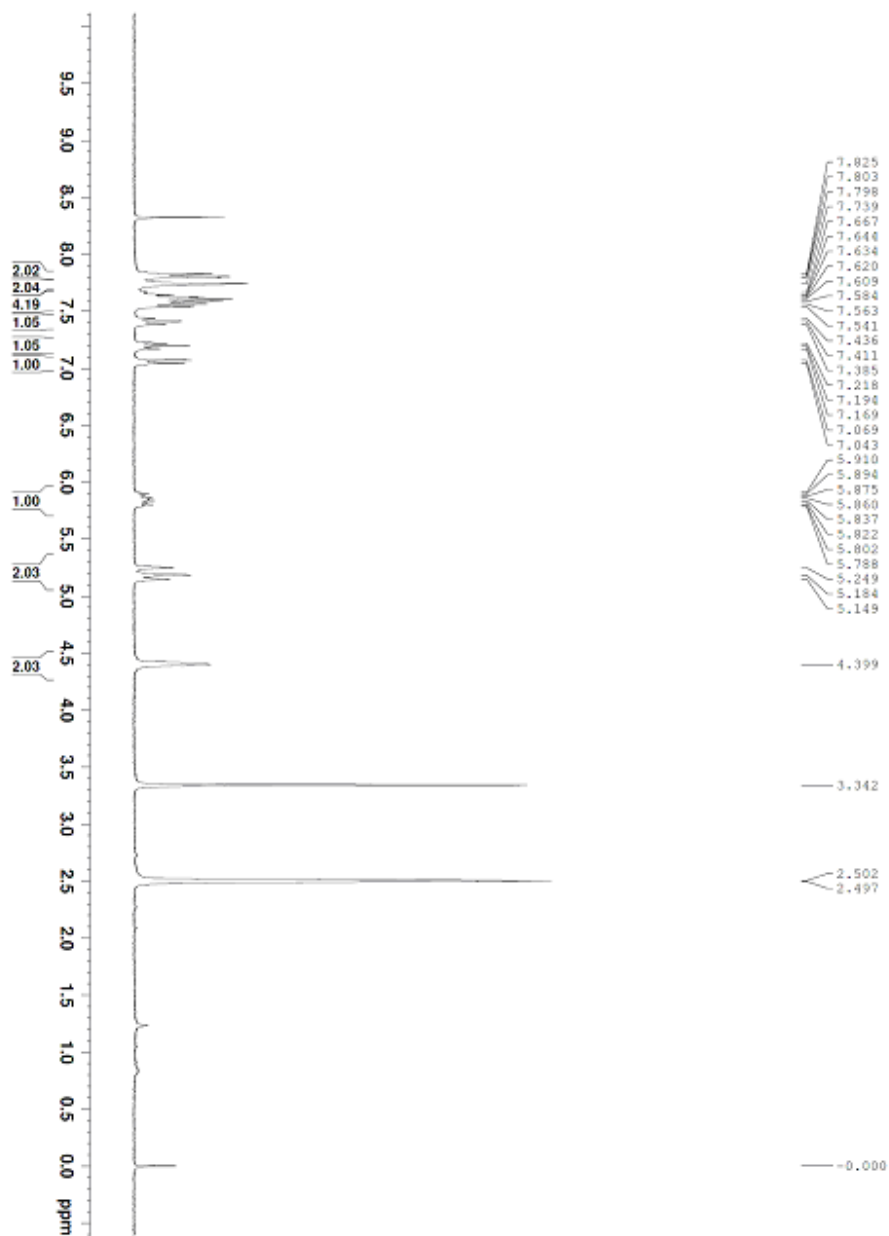

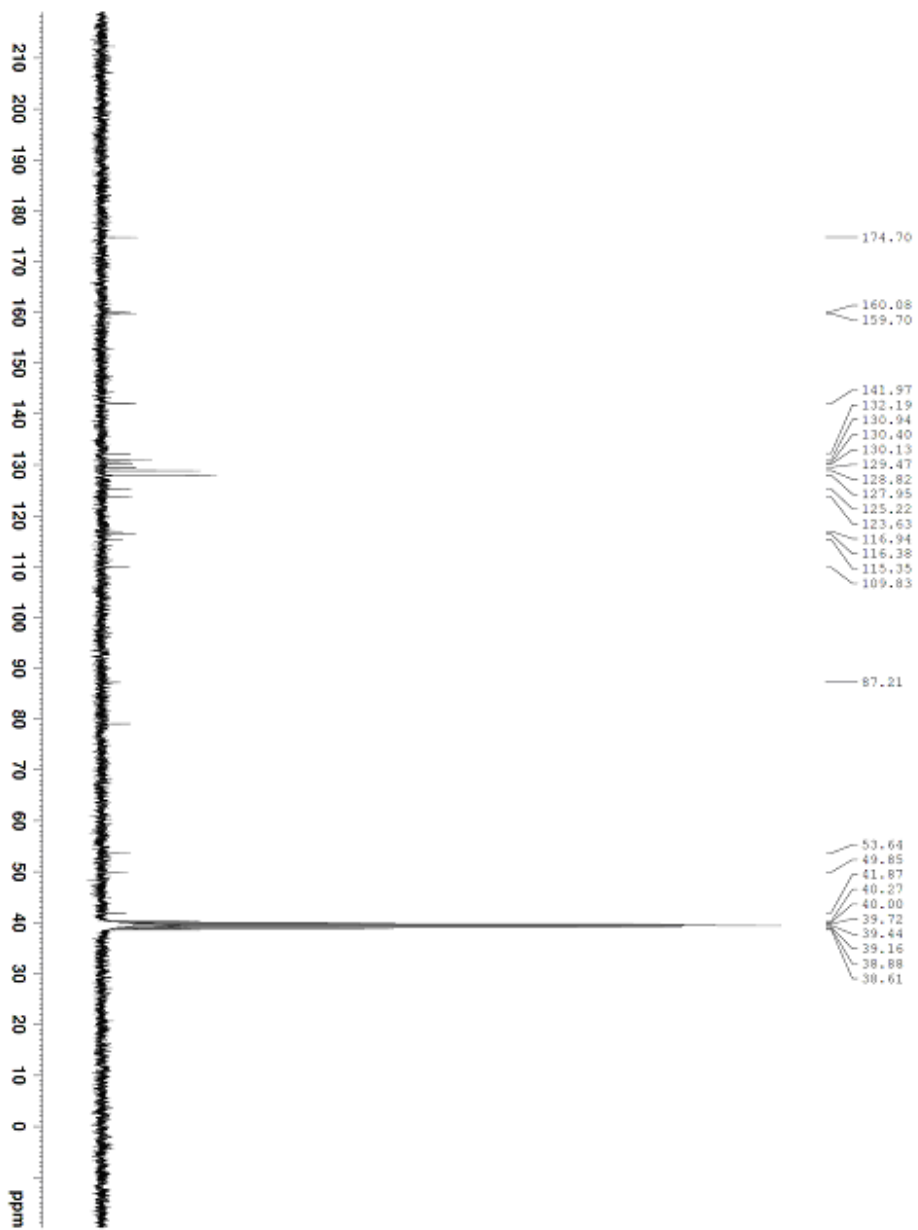



(*S*)-2'-amino-2-oxo-1,6'-diphenylspiro[indoline-3,4'-pyran]-3',5'-dicarbonitrile (**Q4g**)

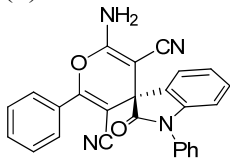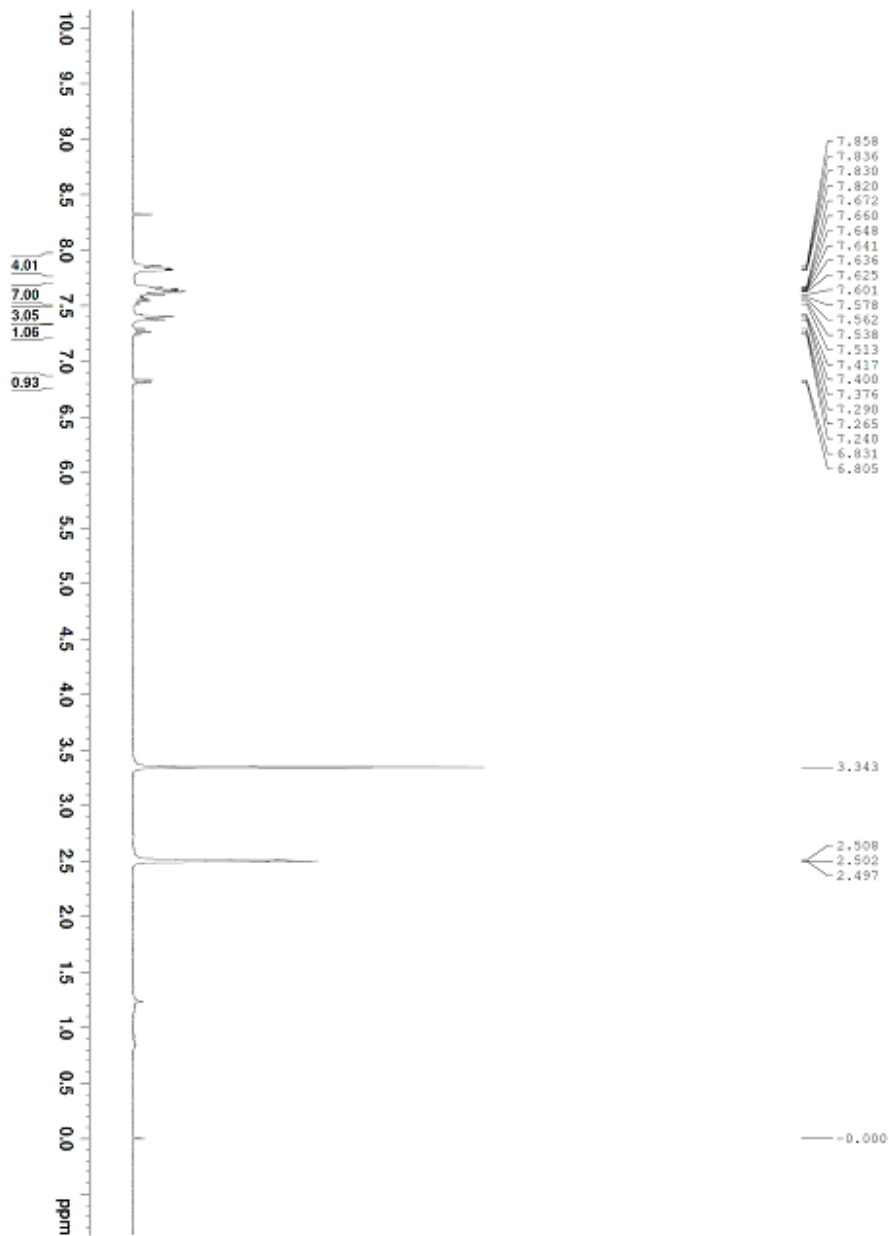

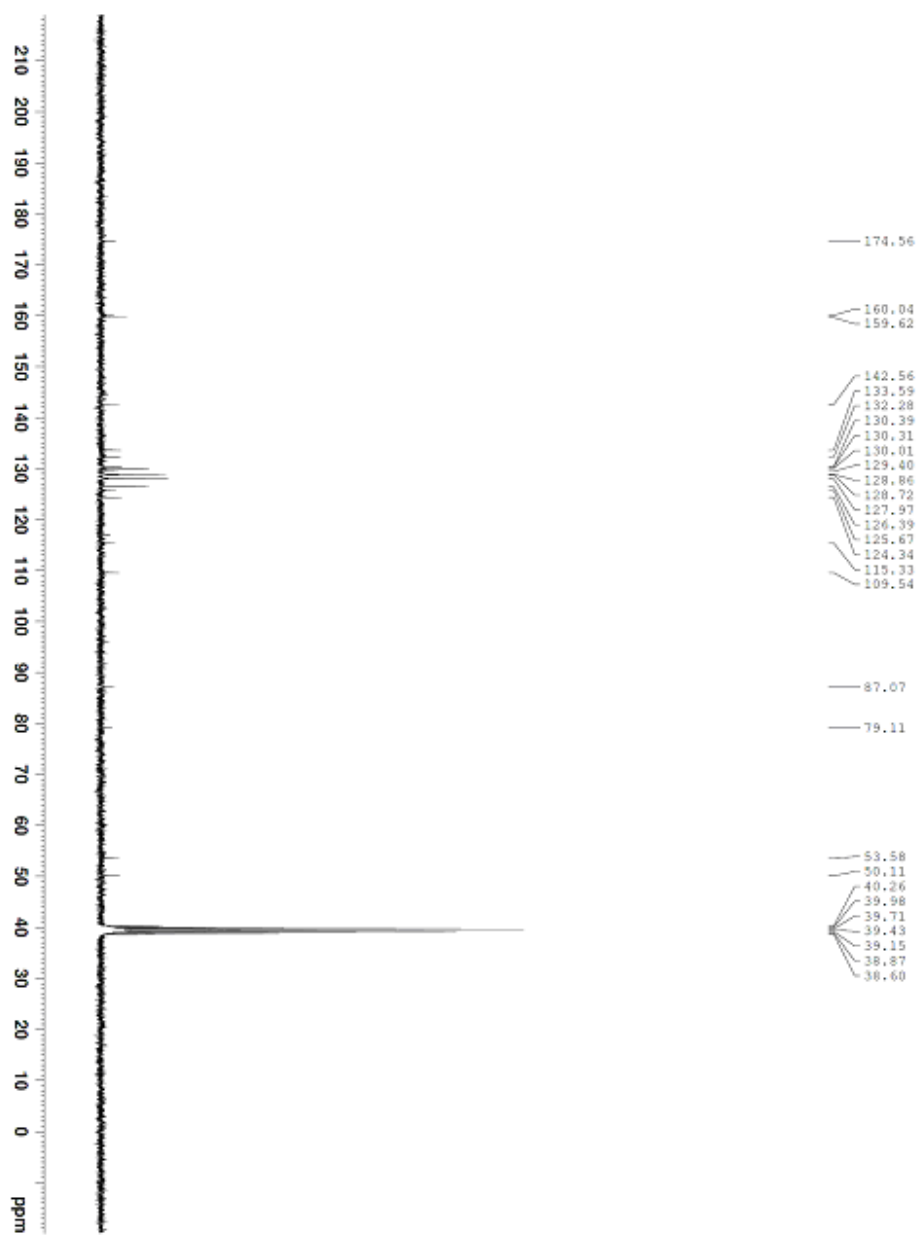

(S)-2'-amino-1-benzyl-2-oxo-6'-phenylspiro[indoline-3,4'-pyran]-3',5'-dicarbonitrile (**Q4h**)

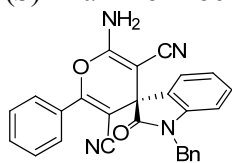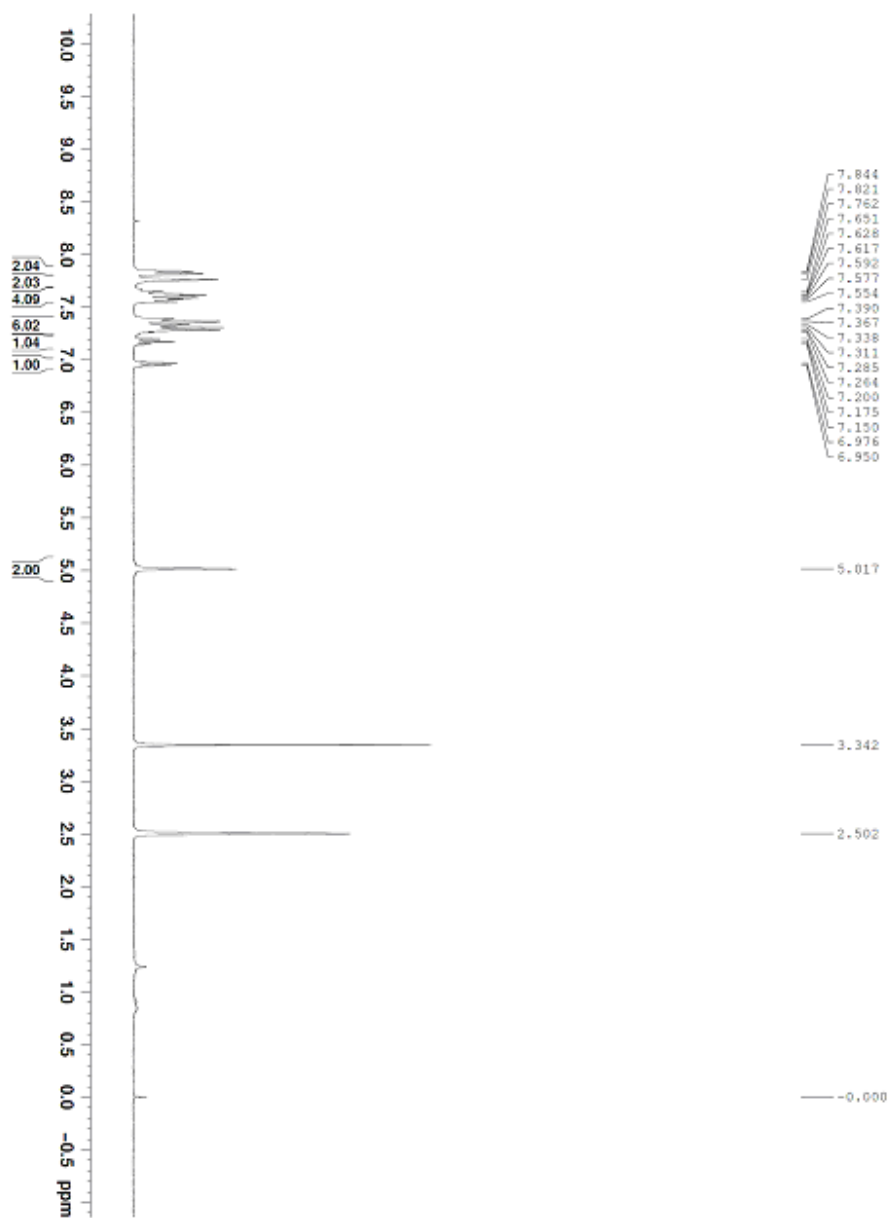

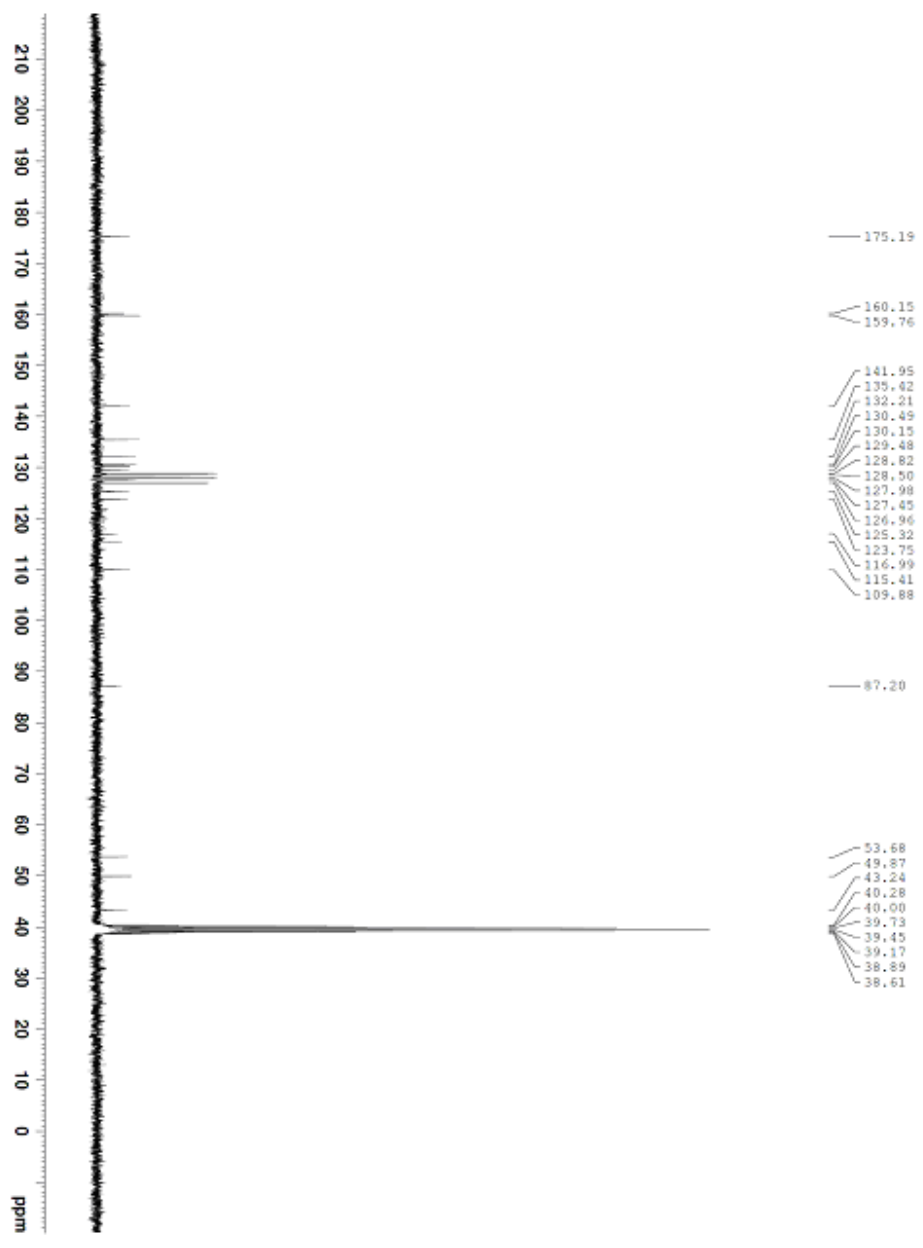

(S)-1-acetyl-2'-amino-2-oxo-6'-phenylspiro[indoline-3,4'-pyran]-3',5'-dicyanitrile (**Q4i**)

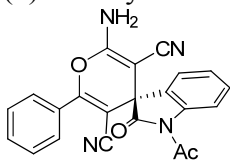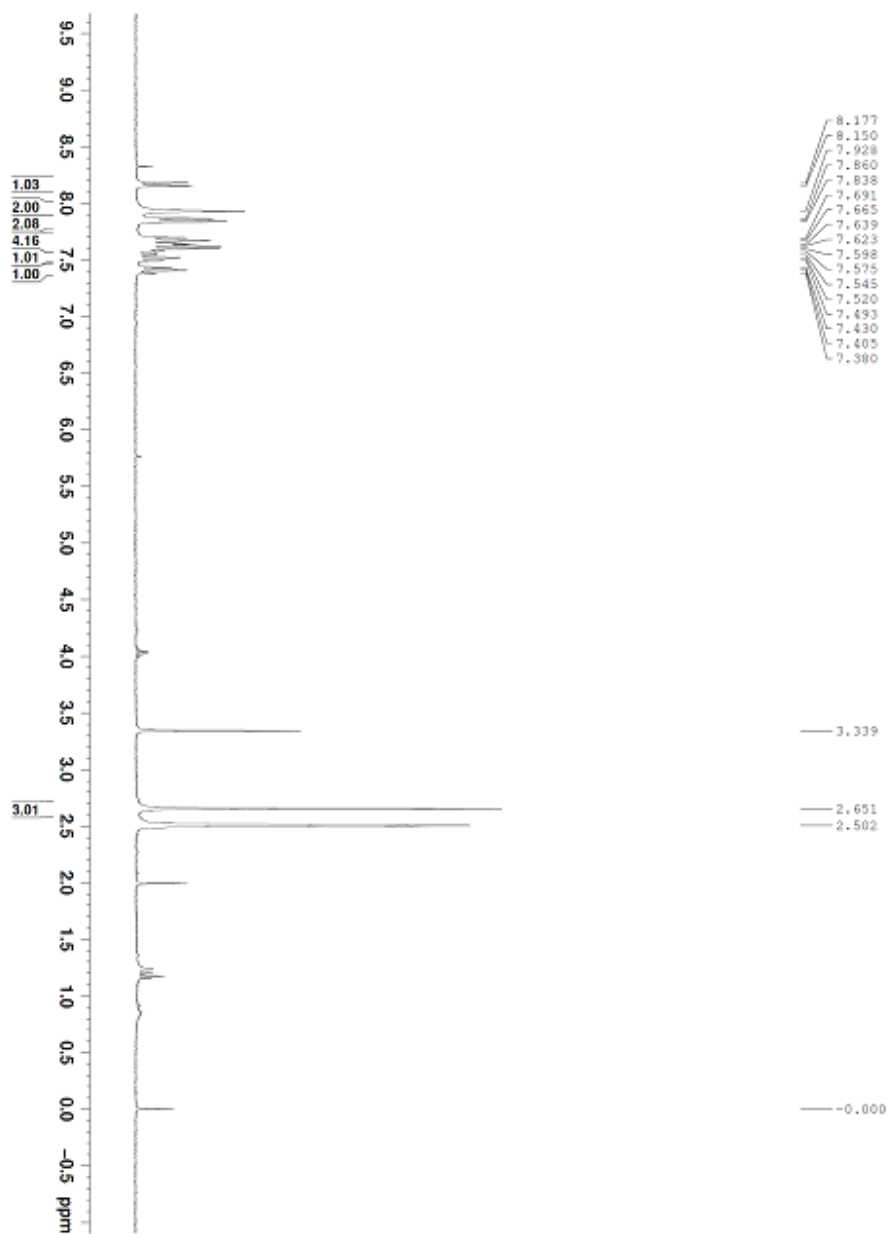

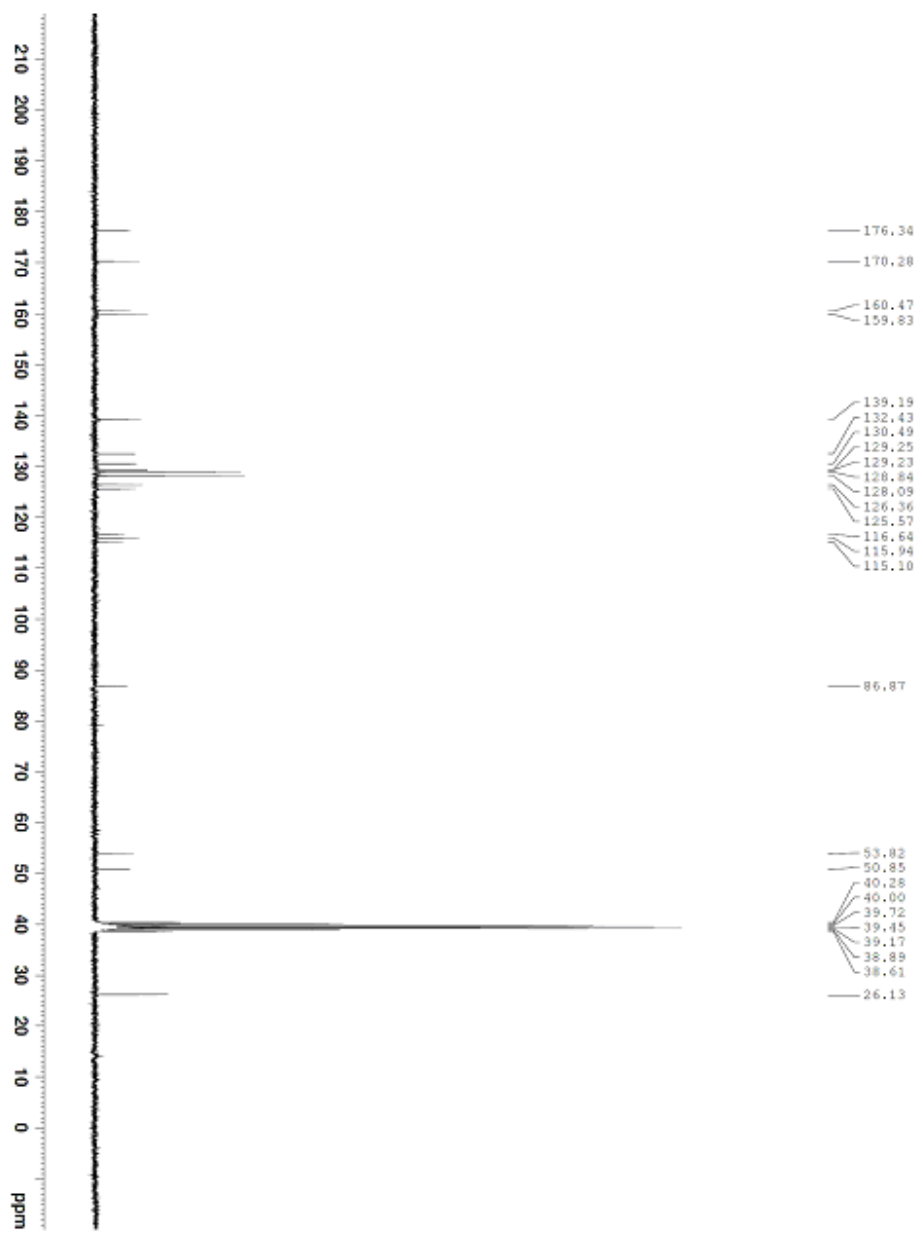

(S)-1-allyl-2'-amino-5-chloro-2-oxo-6'-phenylspiro[indoline-3,4'-pyran]-3',5'-dicarbonitrile (**Q4k**)

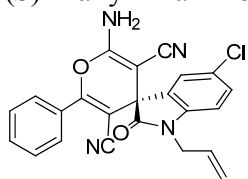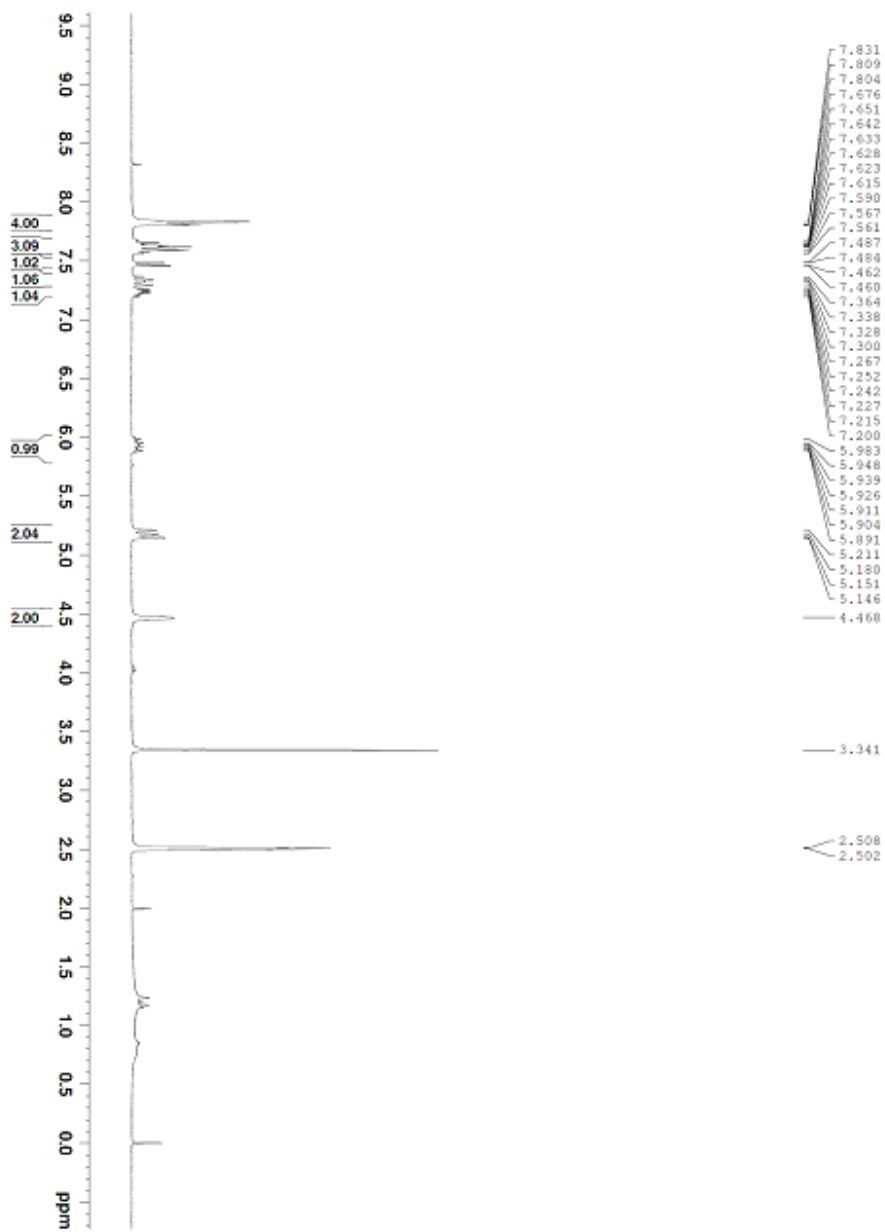

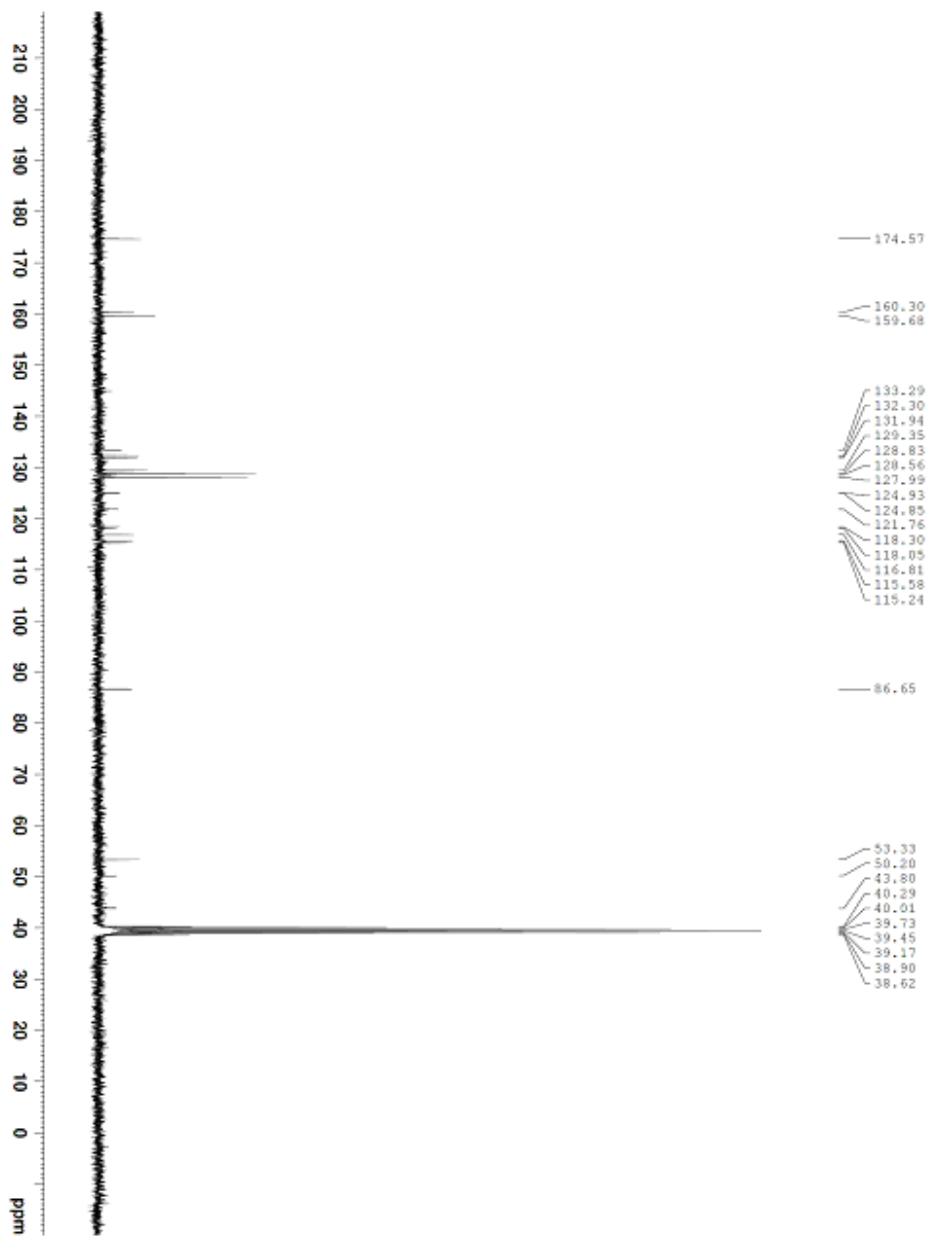



(S)-1-allyl-2'-amino-7-chloro-2-oxo-6'-phenylspiro[indoline-3,4'-pyran]-3',5'-dicarbonitrile (**Q41**)

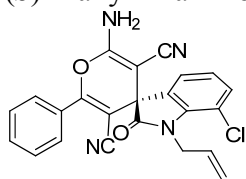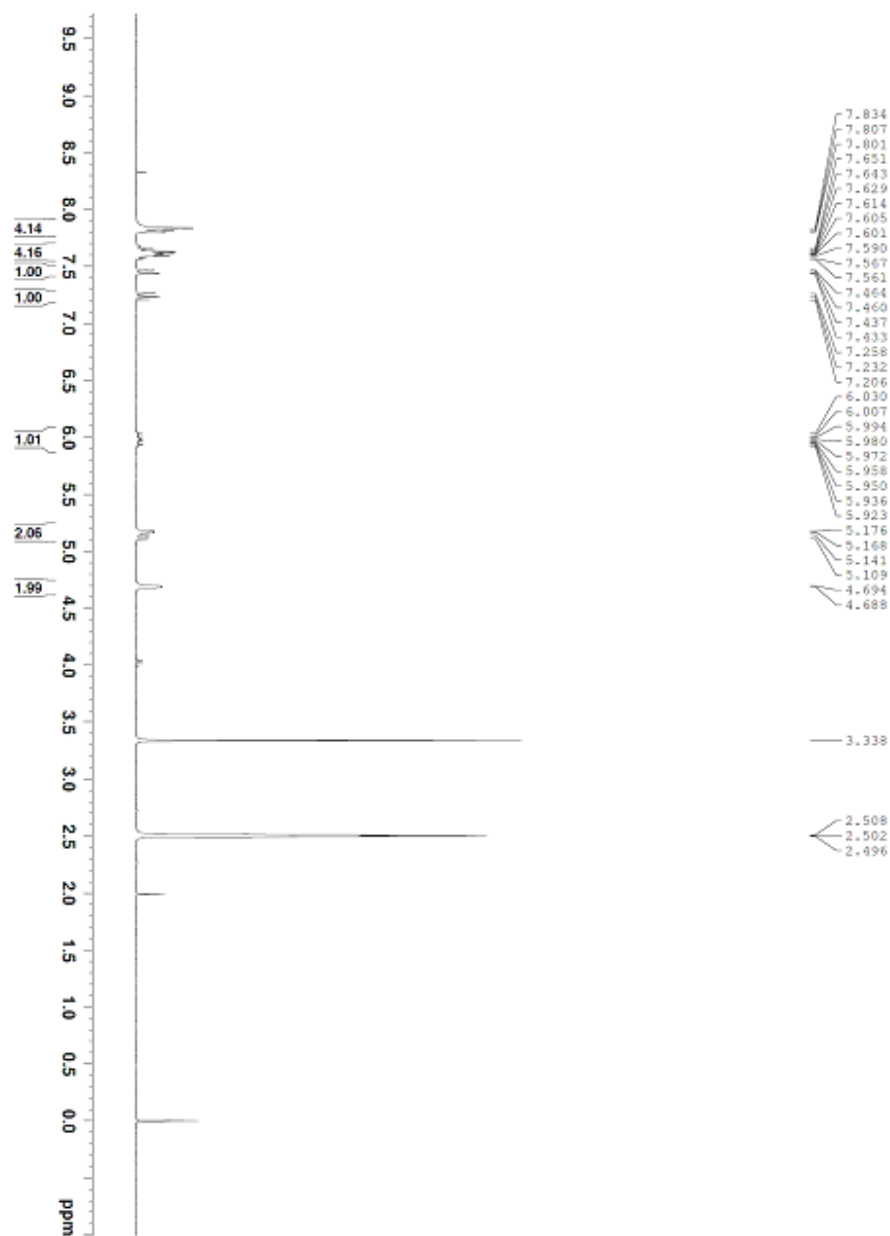

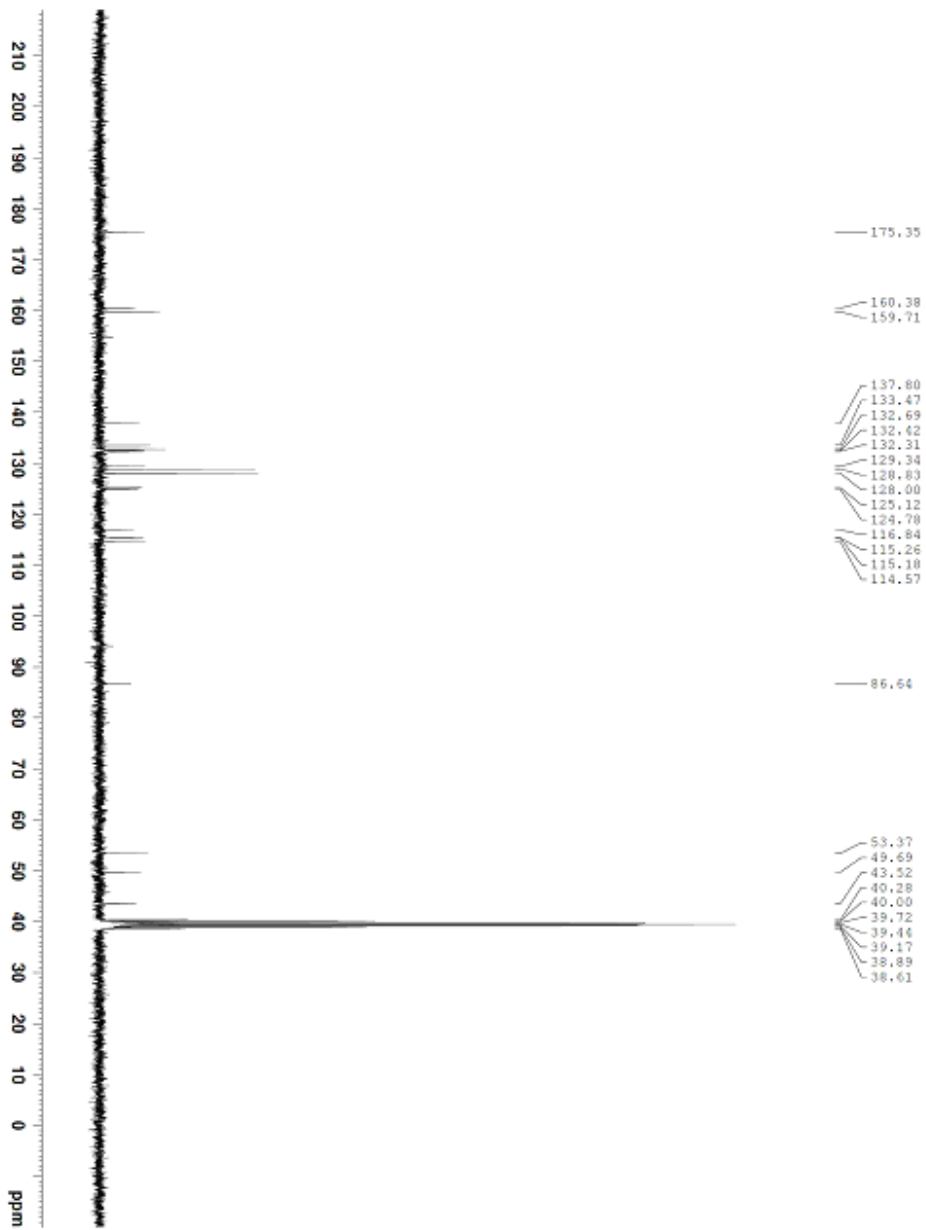

(S)-1-allyl-2'-amino-5-chloro-7-methyl-2-oxo-6'-phenylspiro[indoline-3,4'-pyran]-3',5'-dicarbonitrile (**Q4m**)

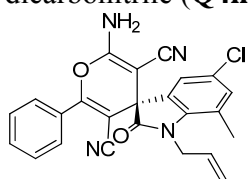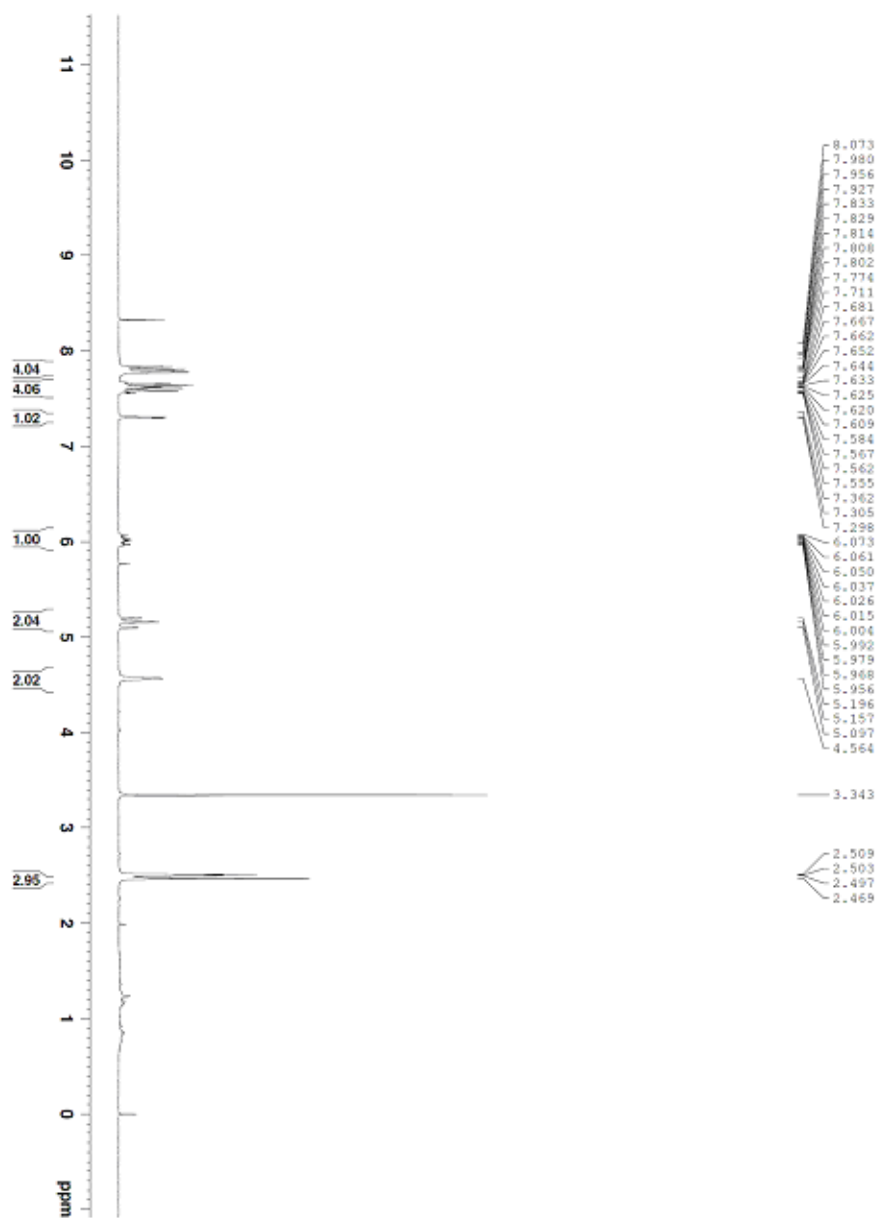

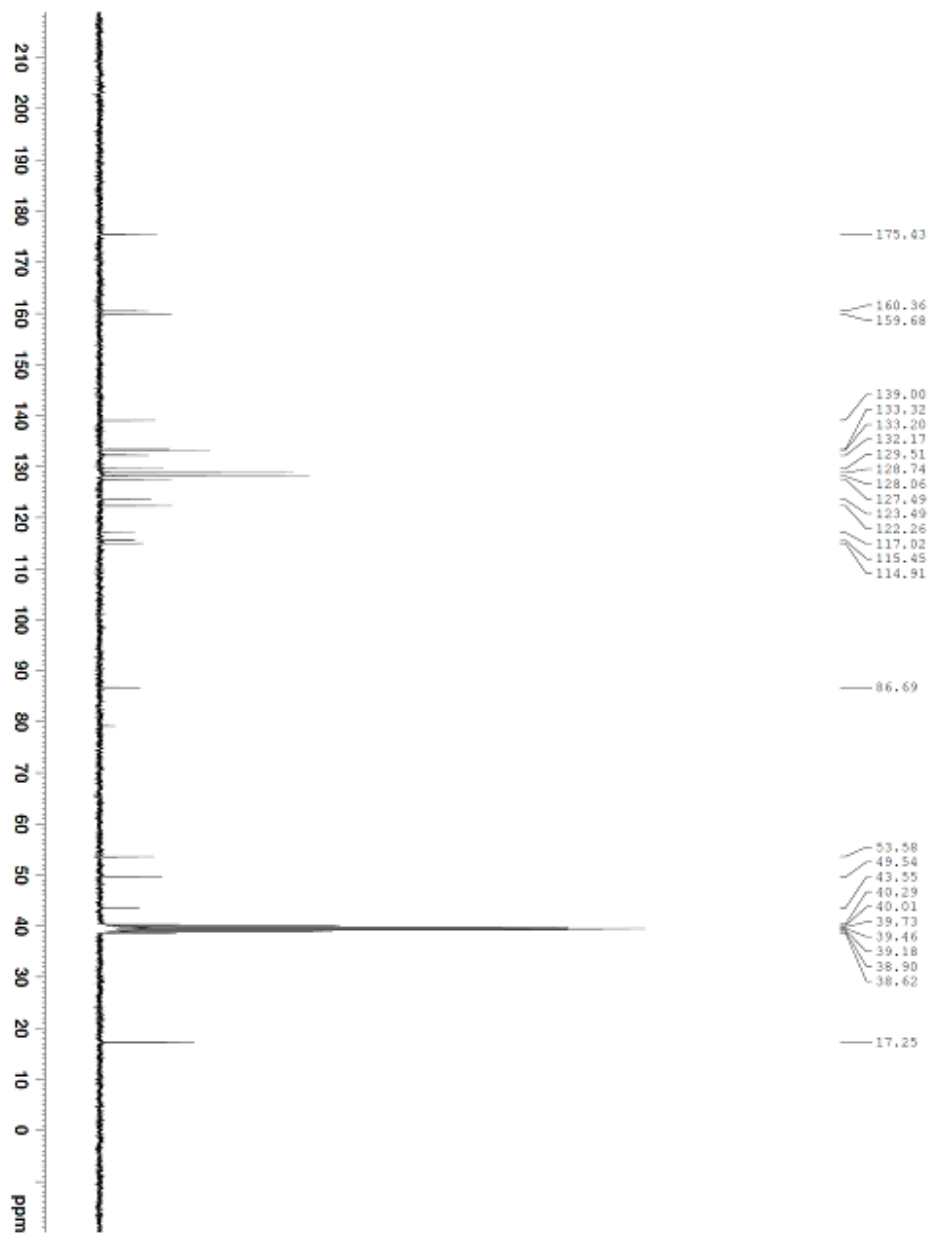

(*S*)-1-allyl-2'-amino-5-bromo-2-oxo-6'-phenylspiro[indoline-3,4'-pyran]-3',5'-dicarbonitrile (**Q4n**)

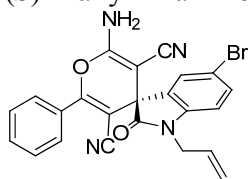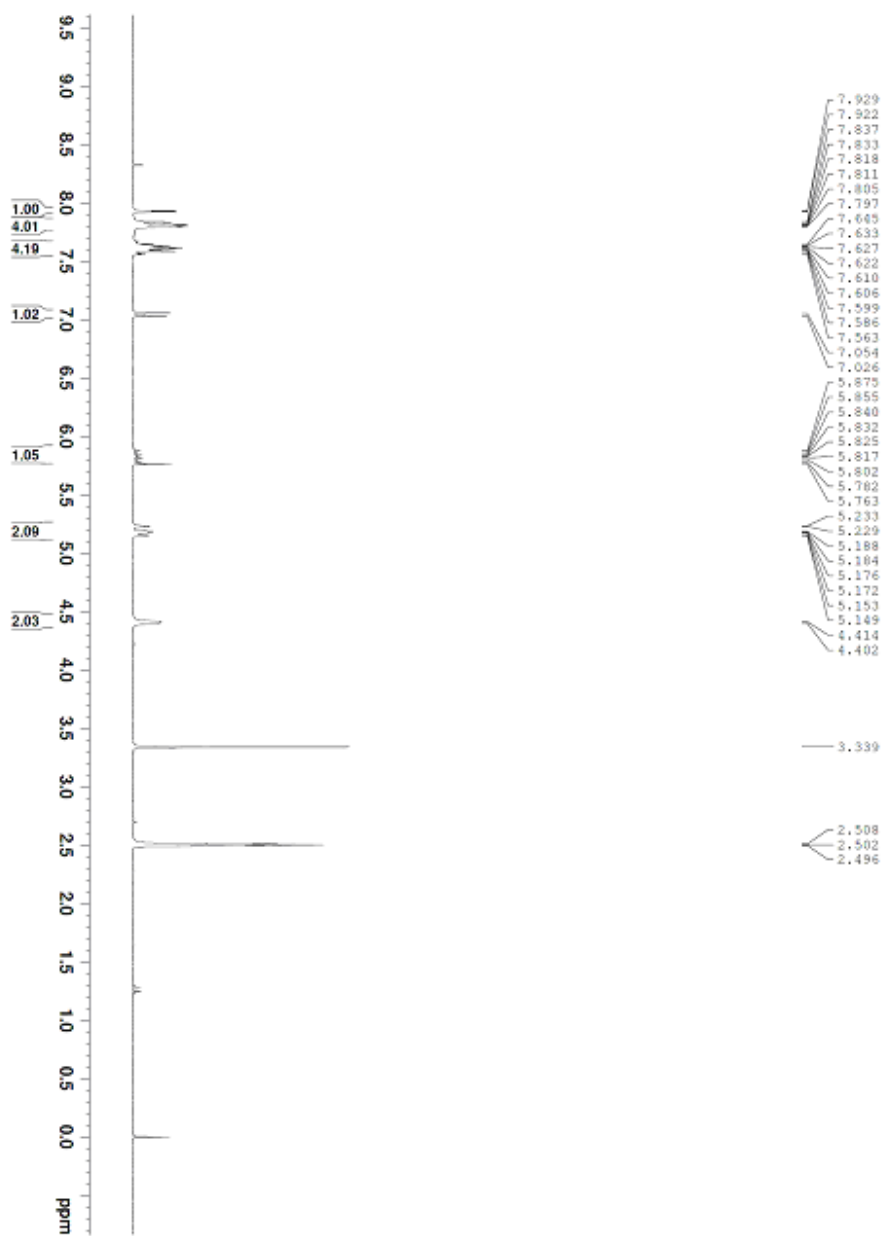

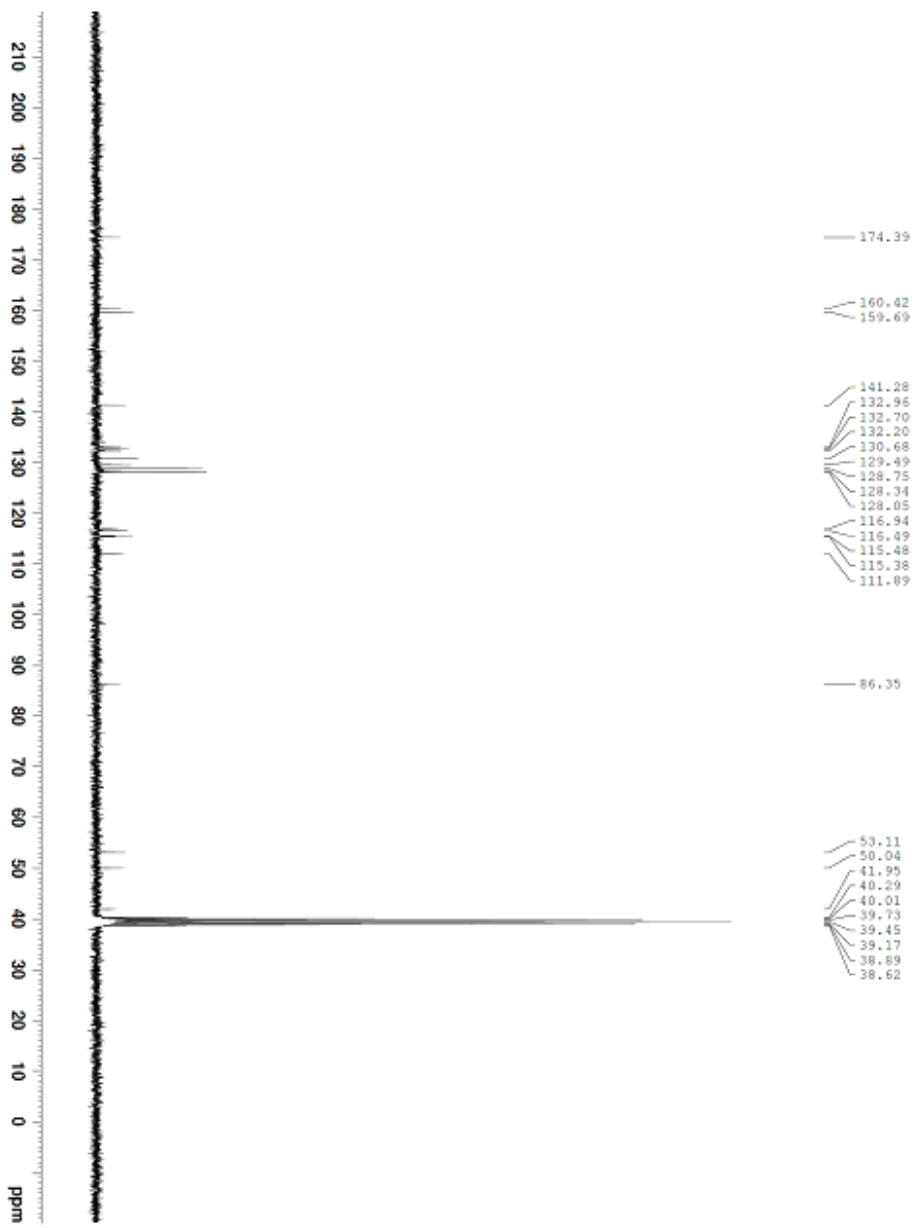

(S)-1-allyl-2'-amino-5-methyl-2-oxo-6'-phenylspiro[indoline-3,4'-pyran]-3',5'-dicarbonitrile (Q4o)

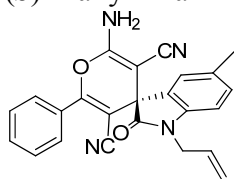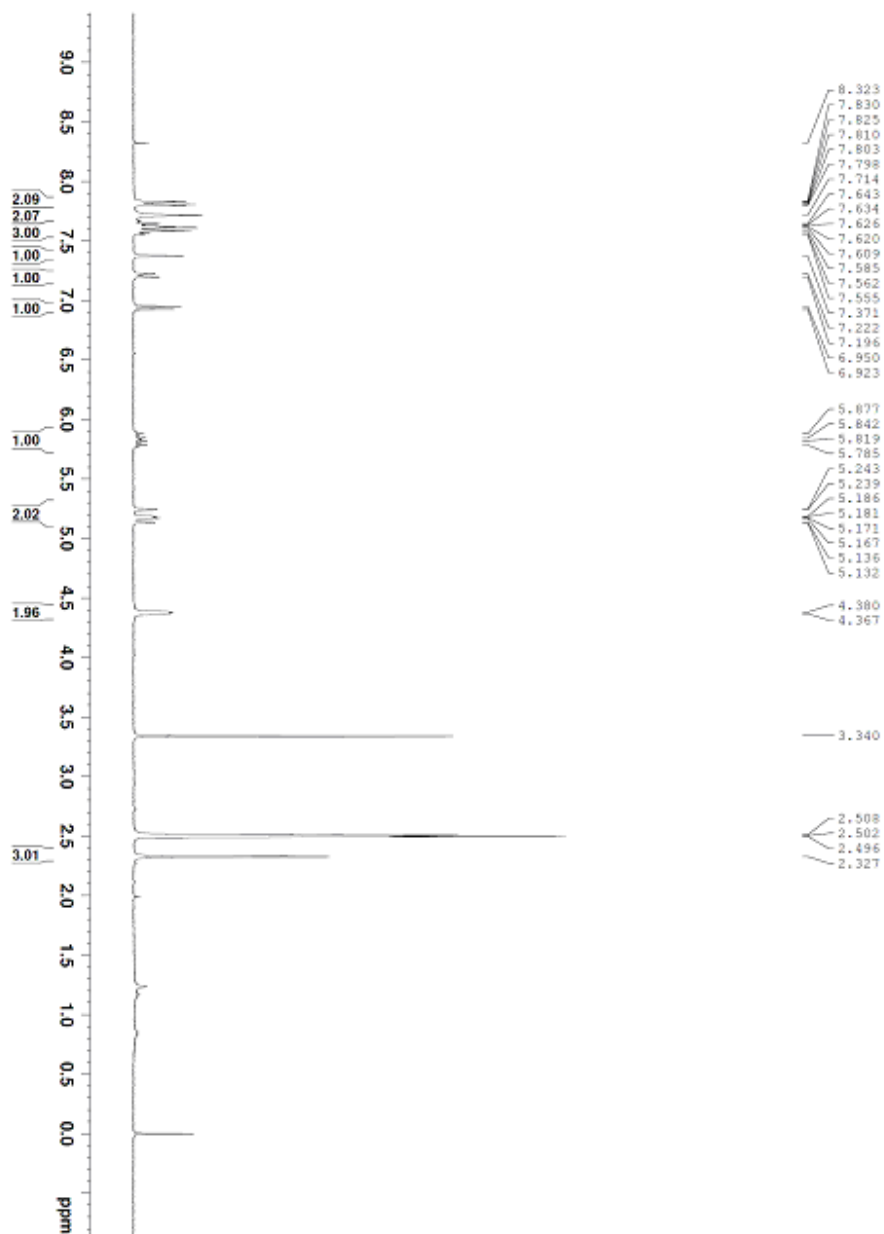

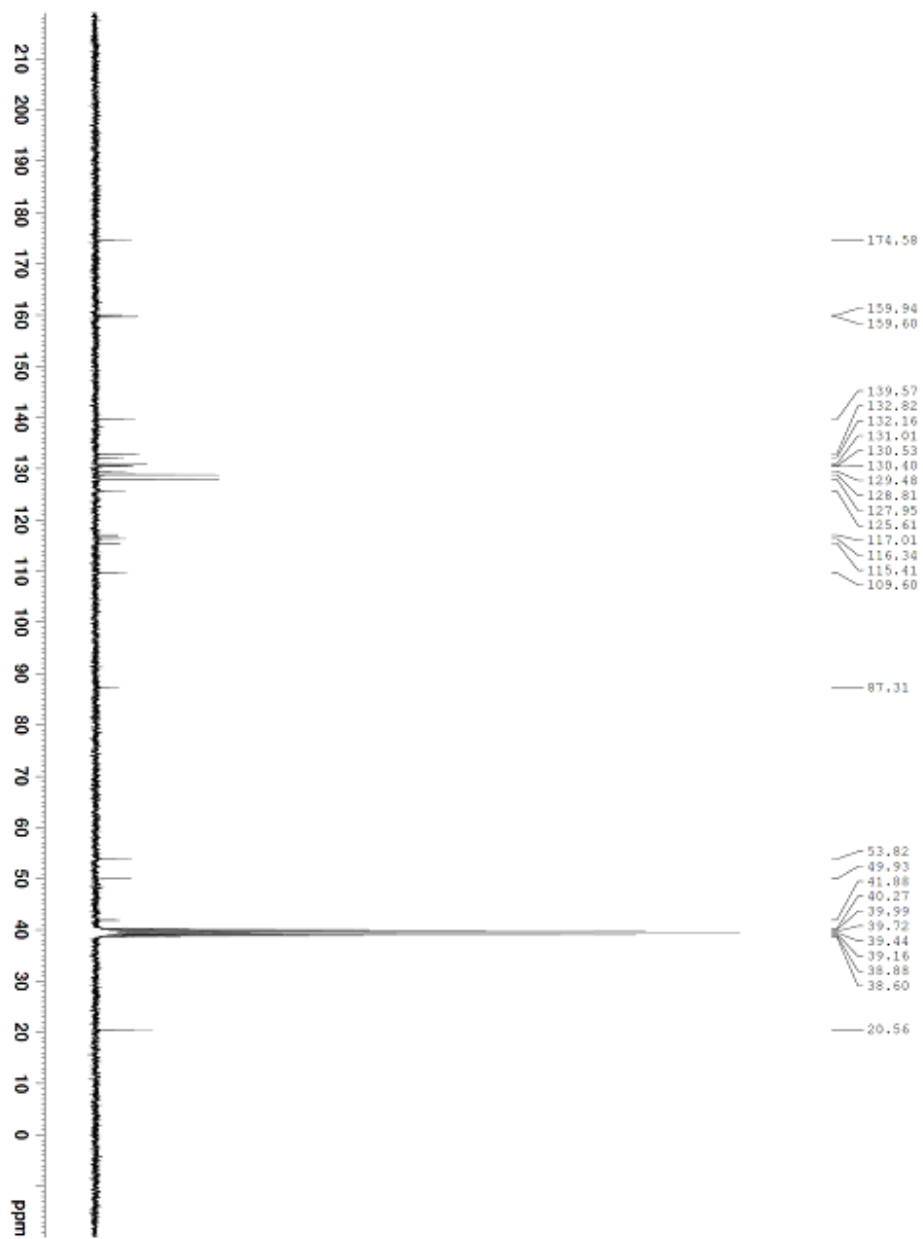



(S)-1-allyl-2'-amino-5-methoxy-2-oxo-6'-phenylspiro[indoline-3,4'-pyran]-3',5'-dicyanitrile  
(Q4p)

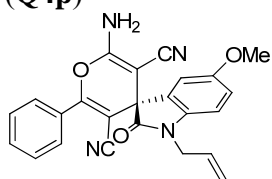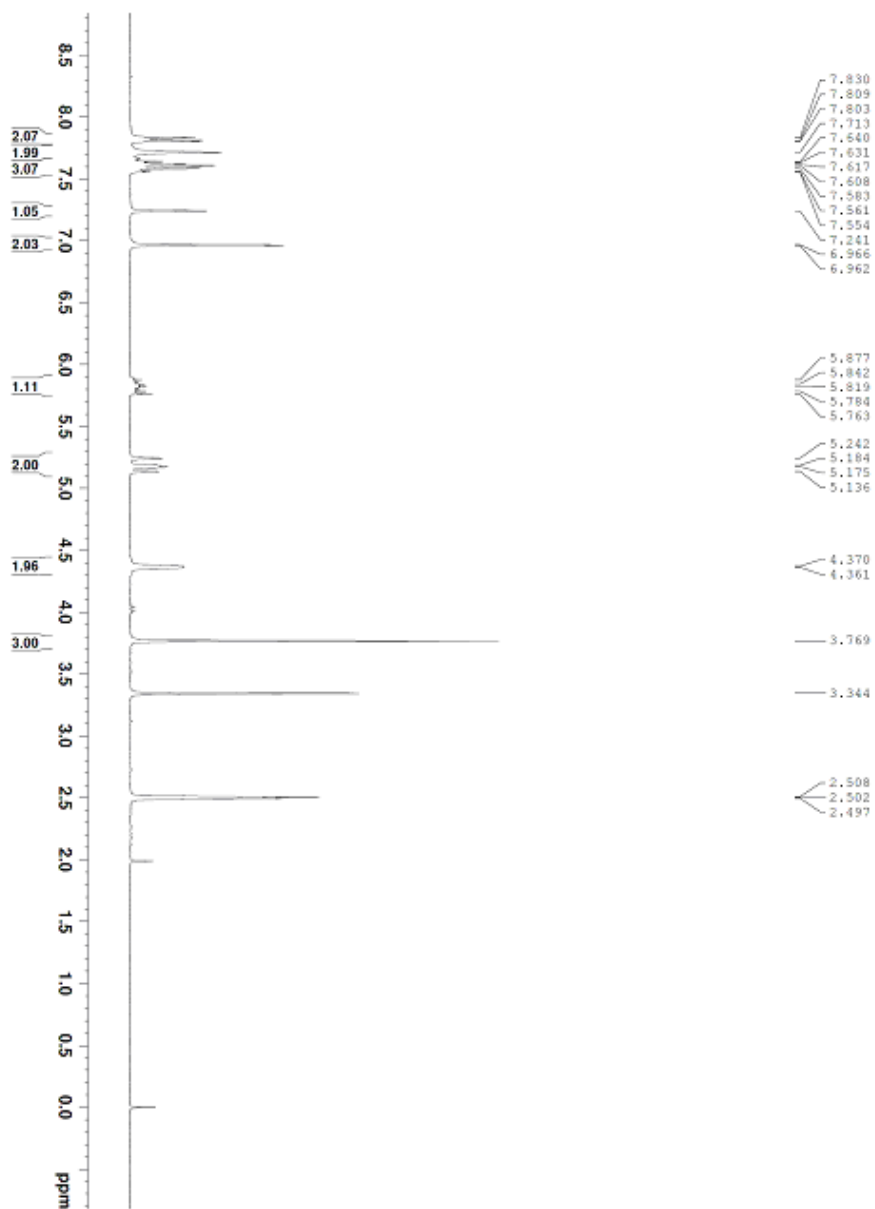

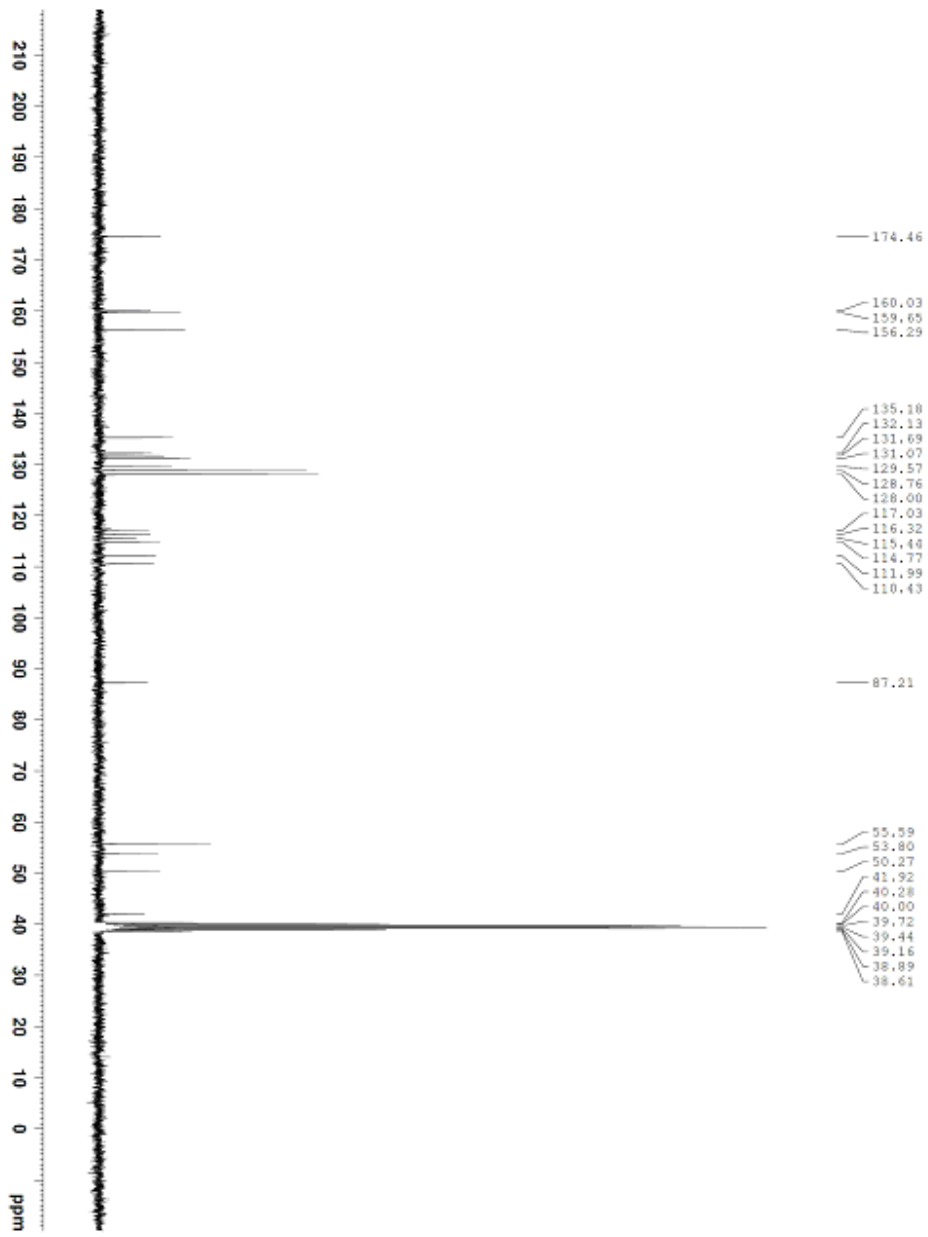

(S)-2'-amino-6'-(3-chlorophenyl)-2-oxospiro[indoline-3,4'-pyran]-3',5'-dicarbonitrile (Q4q)

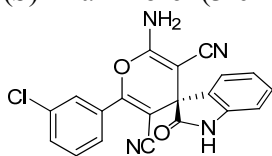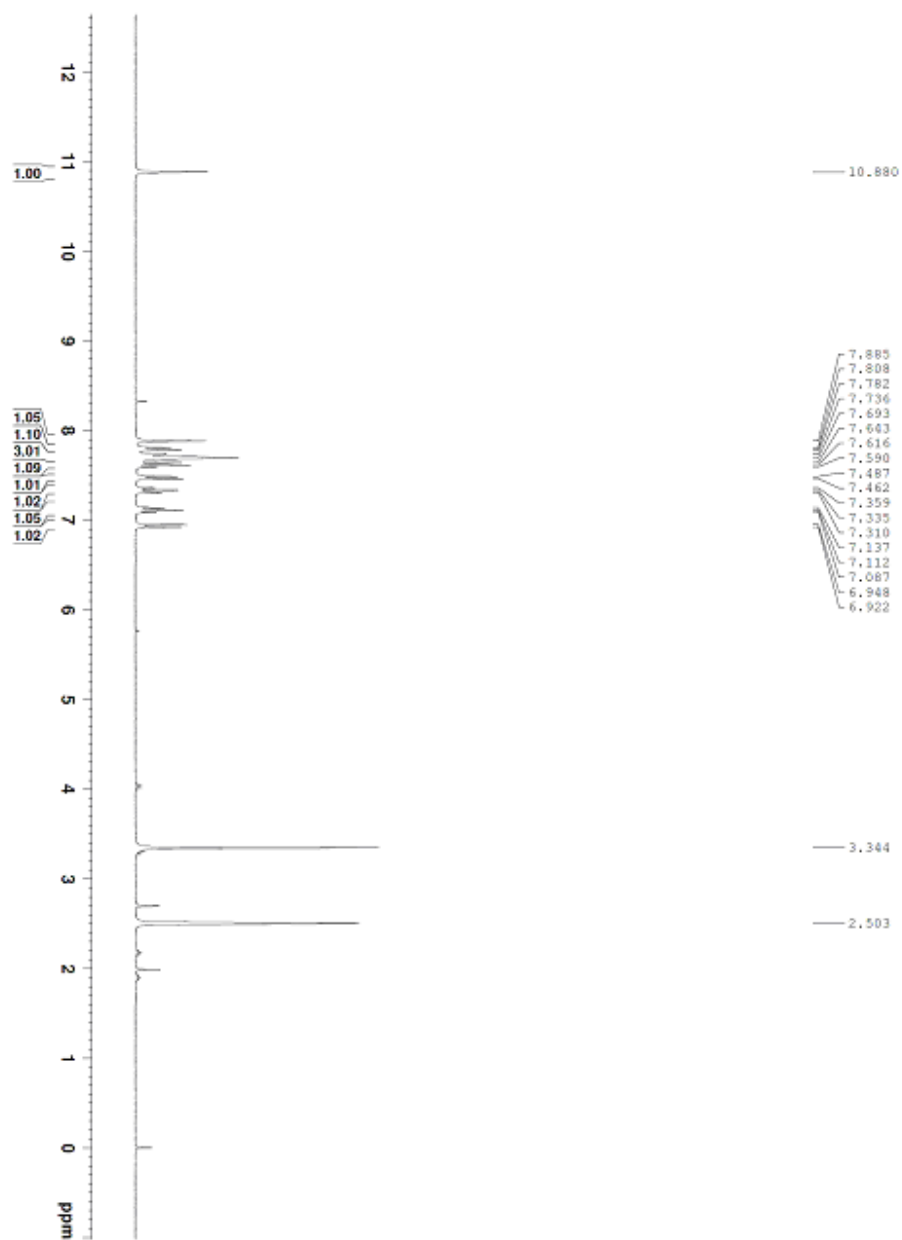

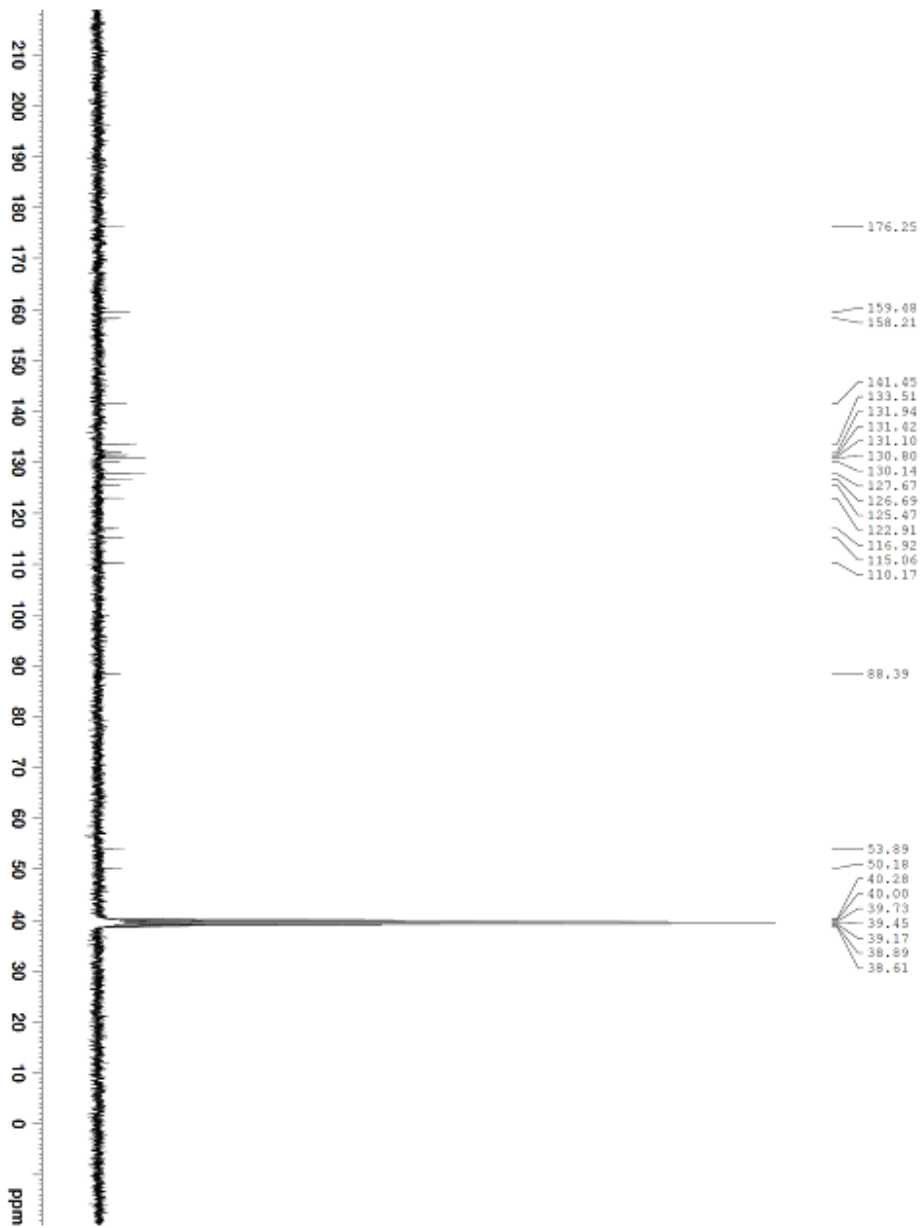

(S)-2'-amino-6'-(4-chlorophenyl)-2-oxospiro[indoline-3,4'-pyran]-3',5'-dicarbonitrile (**Q4r**)

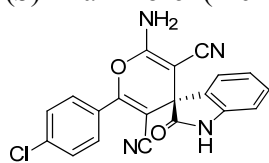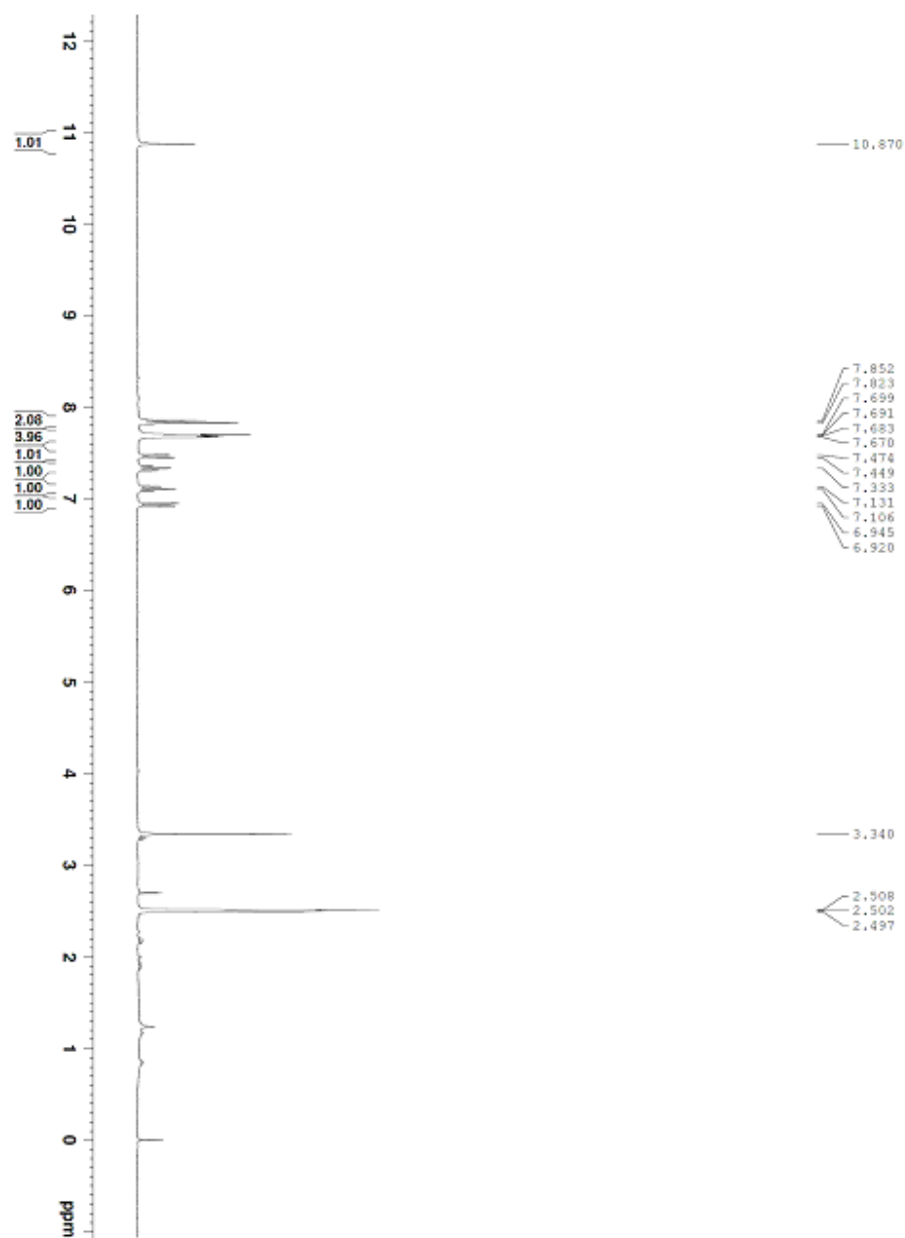

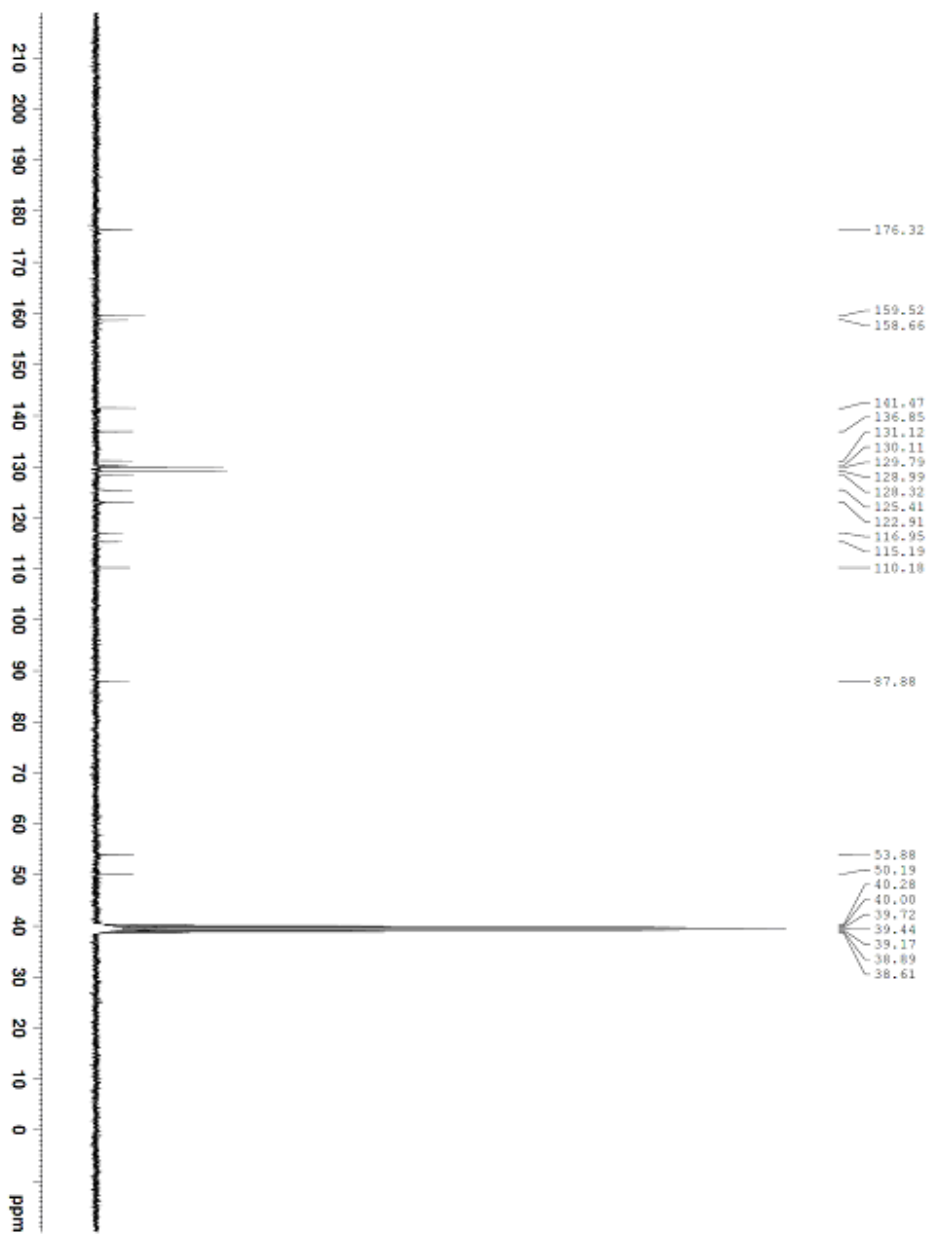

(S)-2'-amino-2-oxo-6'-m-tolylspiro[indoline-3,4'-pyran]-3',5'-dicyanitrile (**Q4s**)

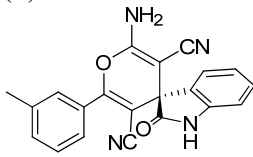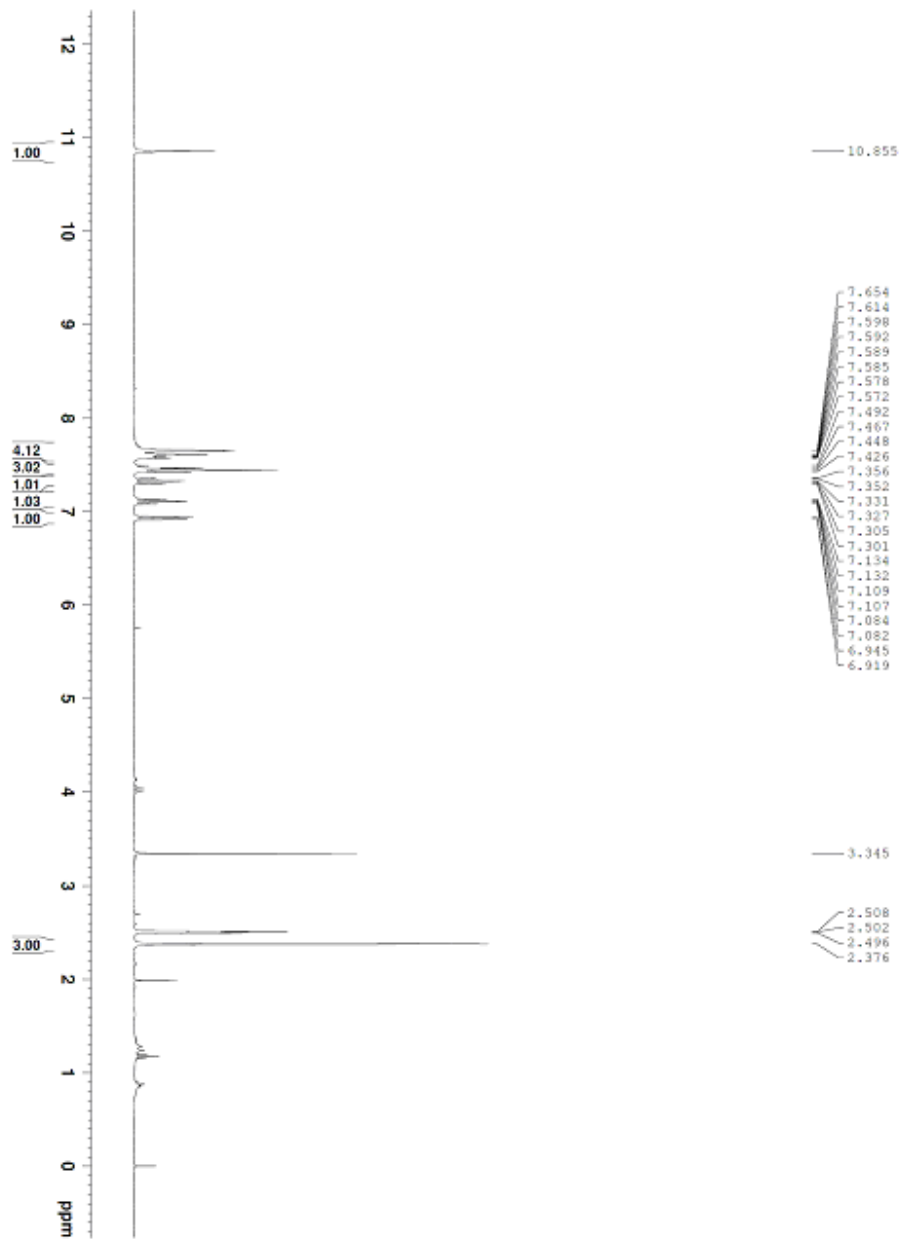

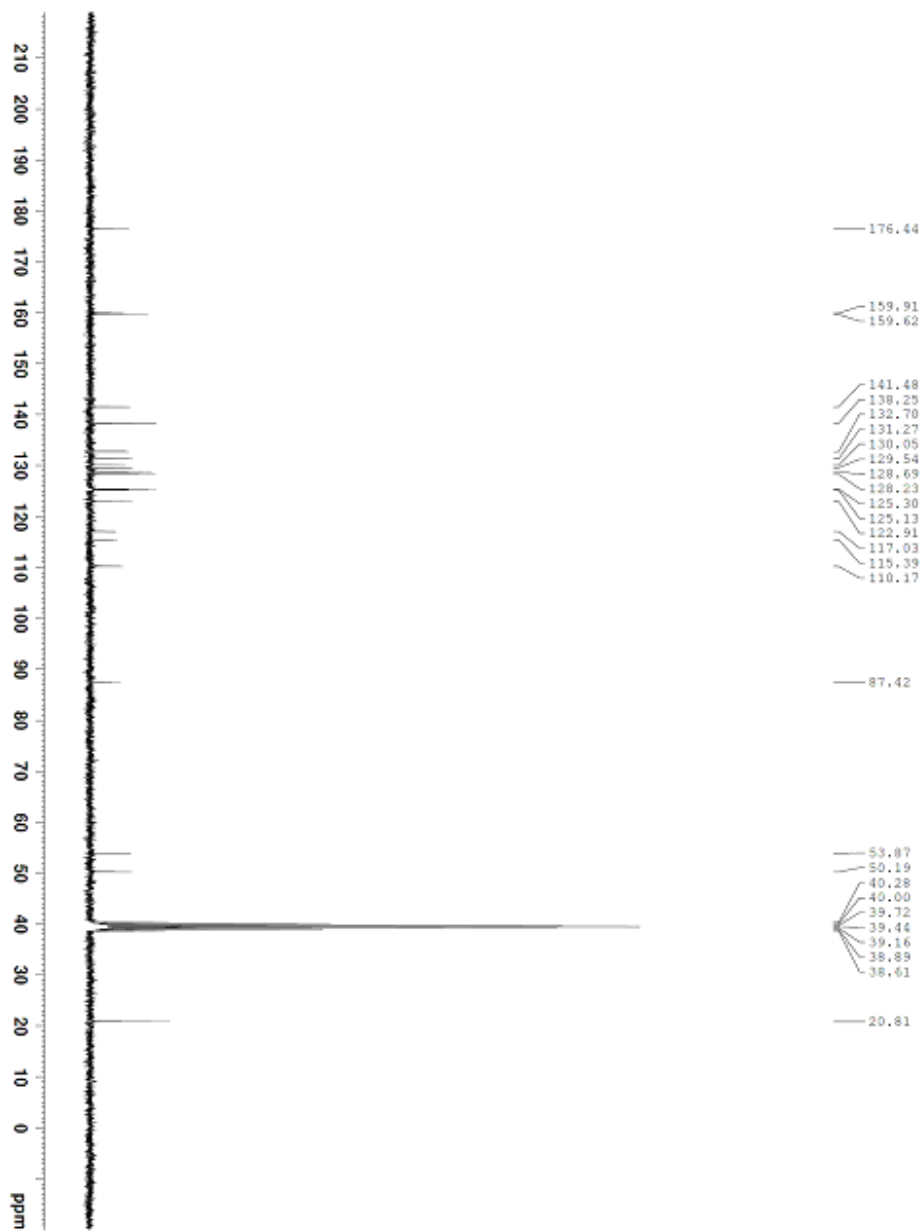



(S)-2'-amino-2-oxo-6'-p-tolylspiro[indoline-3,4'-pyran]-3,5'-dicarbonitrile (**Q4t**)

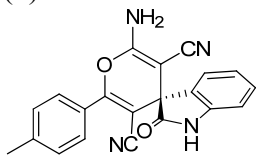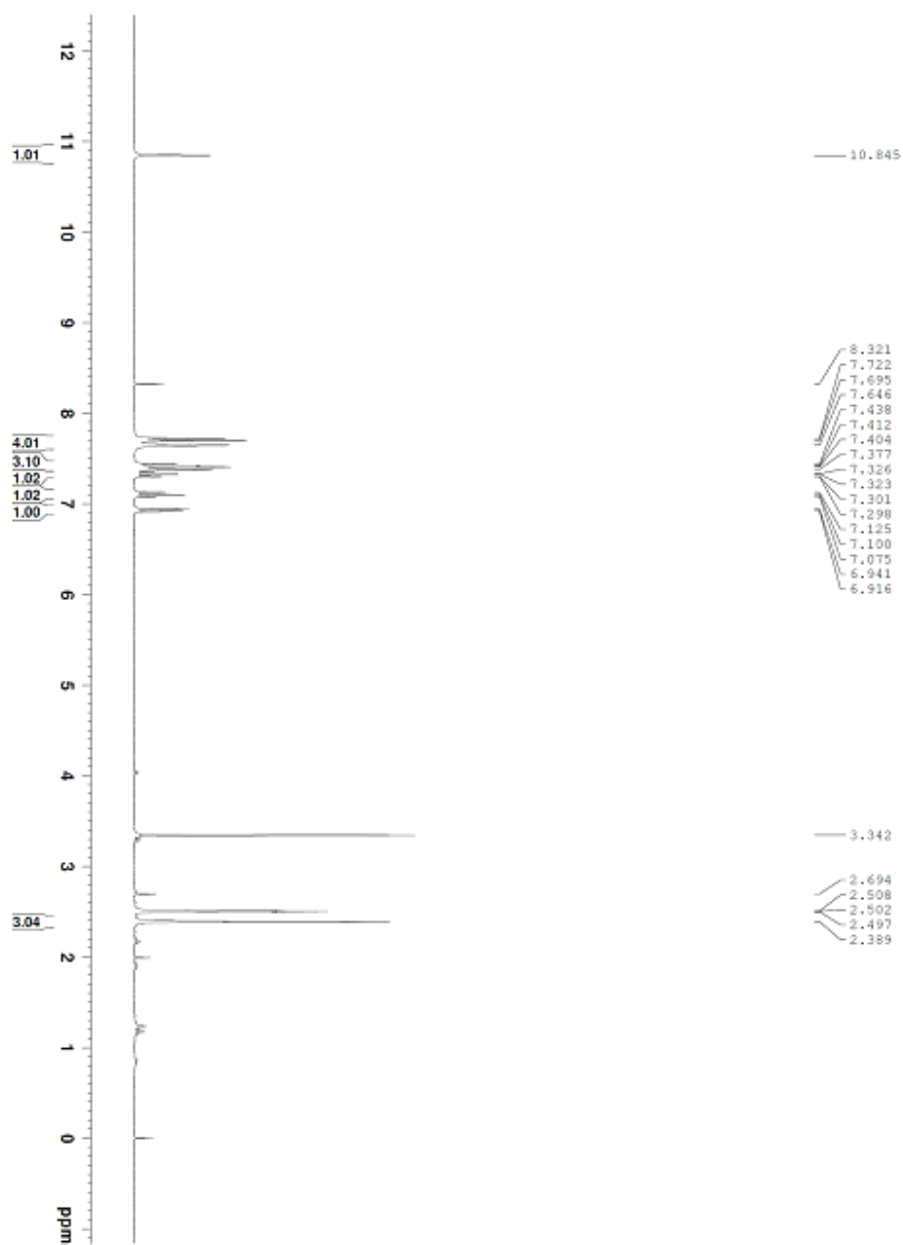

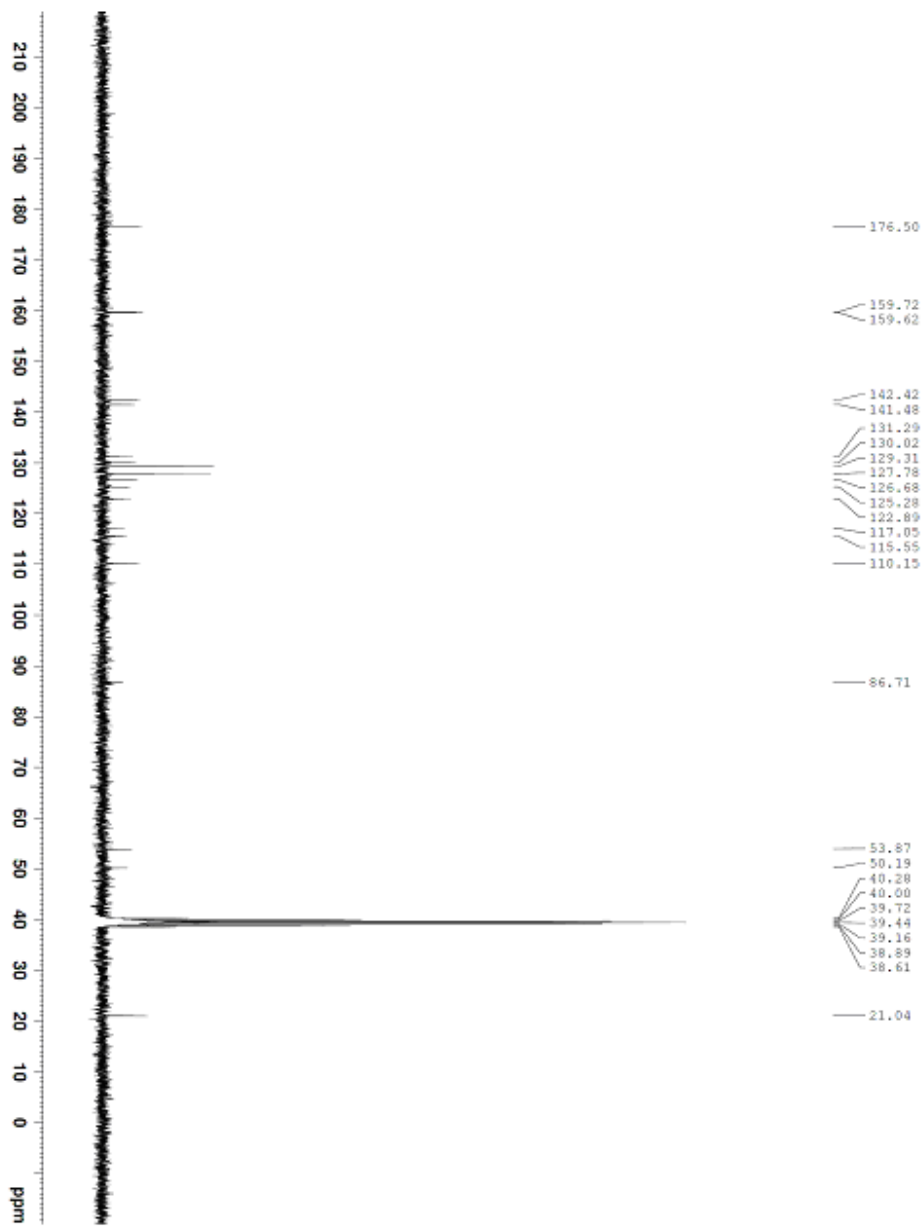

Supplement: srep13699-s1.pdf [file srep13699-s1.pdf]
